# Supplementary material for: Novel O -linked sialoglycan structures in human urinary glycoproteins
Source: Royal Society of Chemistry journal article supplement (doi:10.1039/c9mo00160c), 2020-01-29
Supplement: c9mo00160c1.xlsx [file c9mo00160c1.xlsx]

## Sheet: Legend
Supplement 2.
to the article "Novel O-linked Sialoglycan Structures in Human Urinary Glycoproteins" written by A. Pap, E. Tasnadi, K.F. Medzihradszky & Z. Darula
1. GF-Hunter Output. Searching for additional glycoforms.
The 'seed' peptides were identified from a database search with Protein Prospector as described in the Experimental section.
HCD peaklists in .mgf format and the list of all unique sequences were the input.
The program calculated the Y0 and Y1 values (charge states +1,+2 and +3) and searched for these masses in each HCD spectrum.
Both fragments had to be present in the same charge state, among the 30 most abundant fragment ions, with a mass tolerance of 10 ppm.
Glycan compositions were assigned from the mass differences between the measured MH+ and the mass of the unmodified sequence, with a mass tolerance of 10 ppm.
2. Confirmed glycan compositions
The glycan compositions listed there have been manually validated using HCD and EThcD spectra.
The glycan compositions have been assigned from HCD spectra. EThcD spectra were used to decipher the glycan structure and the site of modification.
Compositions that are printed in red with a lighter red background are sodium adducts.
In the Comment column the word "fragment" indicates that those glycans are the products of larger, intact glycans that underwent in-source fragmentation.
Some glycan compositions were reported in our earlier paper. These compositions were indicated using "ref. 16" in the Reported in column.
3. Glycoforms of AVAVTLQSH
This table was generated form the GF-Hunter OUTPUT.
It lists only the tentatively assigned glycan compositions belonging to the peptide AVAVTLQSH.
These tentative assignments were made by the software if the mass difference between the measured MH+ and the mass of the unmodified sequence corresponds to glycan composition with a mass tolerance of 10 ppm.
4. Glycan Distribution (AVAVTLQSH)
Visual representation of the distribution of glycans found on AVAVTLQSH.
The chart uses the Glycoforms of AVAVTLQSH's data.

## Sheet: GF_Hunter OUTPUT
PEPTIDE	FILE	SCANS	RETENTION_TIME(MINUTES)	PRECURSOR	CHARGE	MH+	SUGAR_MASS	SUGAR_ID	SUGAR_NAME
GTRDPPPSPAR	180417_05	4610	18.25	827.361	3	2480.07	1329.47	23110000	HexNAc2Hex3FucNeuAc
GTRDPPPSPAR	180417_05	4769	18.75	827.362	3	2480.07	1329.47	23110000	HexNAc2Hex3FucNeuAc
GTRDPPPSPAR	180417_05	4873	19	821.691	3	2463.06	1312.46	22020000	HexNAc2Hex2NeuAc2
GTRDPPPSPAR	180417_05	4992	19.27	827.361	3	2480.07	1329.47	23110000	HexNAc2Hex3FucNeuAc
GTRDPPPSPAR	180417_05	5101	19.53	821.689	3	2463.05	1312.46	22020000	HexNAc2Hex2NeuAc2
GEGKVATTVISK	180417_05	5165	19.67	1028.78	3	3084.33	1894.65	22040000	HexNAc2Hex2NeuAc4
VATTVISK	180417_05	5813	20.92	808.021	3	2422.05	1603.55	22030000	HexNAc2Hex2NeuAc3
VATTVISK	180417_05	6164	21.6	710.989	3	2130.95	1312.46	22020000	HexNAc2Hex2NeuAc2
VATTVISK	180417_05	6198	21.67	718.316	3	2152.93	1334.44	22020010	HexNAc2Hex2NeuAc2Na
SALQPSPTHSSSNTQR	180417_05	6397	22.03	1004.1	3	3010.28	1312.46	22020000	HexNAc2Hex2NeuAc2
VATTVISK	180417_05	6460	22.15	710.989	3	2130.95	1312.45	22020000	HexNAc2Hex2NeuAc2
ATAPTAQAPR	180417_05	6707	22.63	766	3	2295.98	1312.46	22020000	HexNAc2Hex2NeuAc2
ATAPTAQAPR	180417_05	6780	22.75	773.328	3	2317.97	1334.44	22020010	HexNAc2Hex2NeuAc2Na
ATAPTAQAPR	180417_05	6827	22.85	921.394	3	2762.17	1778.64	-1	<not-identified>
ATAPTAQAPR	180417_05	6988	23.15	765.999	3	2295.98	1312.46	22020000	HexNAc2Hex2NeuAc2
RGPATPGPSYR	180417_05	6991	23.15	691.293	4	2762.15	1603.55	22030000	HexNAc2Hex2NeuAc3
SDSTVQSGGSHTALGDR	180417_05	7070	23.3	1190.48	3	3569.41	1894.65	22040000	HexNAc2Hex2NeuAc4
SDSTVQSGGSHTALGDR	180417_05	7124	23.4	1040.41	4	4158.61	2483.85	-1	<not-identified>
SDSTVQSGGSHTALGDR	180417_05	7190	23.53	898.603	4	3591.39	1916.62	-1	<not-identified>
SDSTVQSGGSHTALGDR	180417_05	7294	23.75	1093.44	3	3278.31	1603.54	22030000	HexNAc2Hex2NeuAc3
LQATLDHTGHTSSK	180417_05	7409	23.95	848.356	4	3390.4	1894.65	22040000	HexNAc2Hex2NeuAc4
LQATLDHTGHTSSK	180417_05	7544	24.2	775.583	4	3099.31	1603.56	22030000	HexNAc2Hex2NeuAc3
VTLSPKDC(Carbamidomethyl)QVFR	180417_05	7550	24.2	823.709	3	2469.11	1019.36	-1	<not-identified>
LQATLDHTGHTSSK	180417_05	7582	24.27	1033.77	3	3099.31	1603.56	22030000	HexNAc2Hex2NeuAc3
LQATLDHTGHTSSK	180417_05	7672	24.43	702.806	4	2808.2	1312.45	22020000	HexNAc2Hex2NeuAc2
VATTVISK	180417_05	7700	24.48	857.381	3	2570.13	1751.63	44010000	HexNAc4Hex4NeuAc
LQATLDHTGHTSSK	180417_05	7717	24.52	936.744	3	2808.22	1312.47	22020000	HexNAc2Hex2NeuAc2
LQATLDHTGHTSSK	180417_05	7722	24.52	848.353	4	3390.39	1894.64	22040000	HexNAc2Hex2NeuAc4
LQATLDHTGHTSSK	180417_05	7760	24.6	1130.47	3	3389.38	1893.63	-1	<not-identified>
LQATLDHTGHTSSK	180417_05	7831	24.73	775.582	4	3099.3	1603.55	22030000	HexNAc2Hex2NeuAc3
LQATLDHTGHTSSK	180417_05	7942	24.95	1033.43	3	3098.27	1602.52	-1	<not-identified>
LQATLDHTGHTSSK	180417_05	7979	25.02	1033.43	3	3098.27	1602.52	-1	<not-identified>
LQATLDHTGHTSSK	180417_05	8036	25.12	702.807	4	2808.21	1312.46	22020000	HexNAc2Hex2NeuAc2
LQATLDHTGHTSSK	180417_05	8180	25.38	775.319	4	3098.25	1602.5	-1	<not-identified>
RGPATPGPSYR	180417_05	8314	25.63	618.521	4	2471.06	1312.46	22020000	HexNAc2Hex2NeuAc2
VATTVISK	180417_05	8479	25.93	1065.44	3	3194.3	2375.8	-1	<not-identified>
VATTVISK	180417_05	8562	26.08	710.989	3	2130.95	1312.46	22020000	HexNAc2Hex2NeuAc2
RGPATPGPSYR	180417_05	8581	26.12	824.358	3	2471.06	1312.46	22020000	HexNAc2Hex2NeuAc2
VATTVISK	180417_05	8636	26.23	718.319	3	2152.94	1334.44	22020010	HexNAc2Hex2NeuAc2Na
VATTVISK	180417_05	8728	26.4	920.724	3	2760.16	1941.66	-1	<not-identified>
VATTVISK	180417_05	8883	26.72	1065.42	3	3194.24	2375.74	-1	<not-identified>
SQIANSGSAGLINPAATVNDESGR	180417_05	9138	27.2	1129.47	4	4514.85	2185.72	-1	<not-identified>
AVAVTLQSH	180417_05	9395	27.68	766.008	3	2296.01	1370.5	32110000	HexNAc3Hex2FucNeuAc
VATTVISK	180417_05	9678	28.2	589.279	3	1765.82	947.325	11020000	HexNAcHexNeuAc2
VATTVISK	180417_05	9698	28.25	738.324	3	2212.96	1394.46	-1	<not-identified>
AVAVTLQSH	180417_05	9815	28.45	1135.93	4	4540.72	3615.21	-1	<not-identified>
REDQTSPAPGLR	180417_05	9853	28.53	564.608	3	1691.81	365.132	11000000	HexNAcHex
AVAVTLQSH	180417_05	9948	28.72	1087.11	3	3259.33	2333.82	44030000	HexNAc4Hex4NeuAc3
AVAVTLQSH	180417_05	10328	29.43	1221.53	4	4883.1	3957.59	-1	<not-identified>
AVAVTLQSH	180417_05	10744	30.37	795.346	3	2384.02	1458.51	22120000	HexNAc2Hex2FucNeuAc2
GQQGQGPWGTGGTPHGPR	180417_05	10932	30.78	1223.84	3	3669.49	1894.66	22040000	HexNAc2Hex2NeuAc4
AVAVTLQSH	180417_05	11087	31.13	746.661	3	2237.97	1312.46	22020000	HexNAc2Hex2NeuAc2
AVAVTLQSH	180417_05	11195	31.35	1128.1	3	3382.28	2456.77	-1	<not-identified>
AVAVTLQSH	180417_05	11205	31.37	1120.78	3	3360.32	2434.81	-1	<not-identified>
AVAVTLQSH	180417_05	11234	31.43	1120.78	3	3360.32	2434.81	-1	<not-identified>
AVAVTLQSH	180417_05	11304	31.6	1263.82	3	3789.46	2863.95	-1	<not-identified>
AVAVTLQSH	180417_05	11324	31.63	760.665	3	2279.98	1354.47	22021000	HexNAc2Hex2NeuAcNeuAcAc
AVAVTLQSH	180417_05	11340	31.68	809.349	3	2426.03	1500.52	22121000	HexNAc2Hex2FucNeuAcNeuAcAc
LQATLDHTGHTSSK	180417_05	11415	31.85	1204.89	3	3612.66	2116.91	-1	<not-identified>
AVAVTLQSH	180417_05	11428	31.87	624.949	3	1872.83	947.323	11020000	HexNAcHexNeuAc2
SVSHSAQPPAHQPPMISTK	180417_05	11477	31.98	992.928	4	3968.69	1968.69	33030000	HexNAc3Hex3NeuAc3
AVAVTLQSH	180417_05	11510	32.05	1424.28	3	4270.83	3345.32	-1	<not-identified>
AVAVTLQSH	180417_05	11516	32.05	1120.12	3	3358.34	2432.83	-1	<not-identified>
SVSHSAQPPAHQPPMISTK	180417_05	11541	32.12	993.425	4	3970.68	1970.68	-1	<not-identified>
AVAVTLQSH	180417_05	11565	32.17	1424.63	3	4271.88	3346.37	-1	<not-identified>
HLC(Carbamidomethyl)HTPEPTC(Carbamidomethyl)PPHEFK	180417_05	11597	32.23	1101.13	3	3301.36	1314.47	-1	<not-identified>
SVSHSAQPPAHQPPMISTK	180417_05	11611	32.27	828.87	4	3312.46	1312.45	22020000	HexNAc2Hex2NeuAc2
HLC(Carbamidomethyl)HTPEPTC(Carbamidomethyl)PPHEFK	180417_05	11645	32.33	825.846	4	3300.36	1313.47	22210000	HexNAc2Hex2Fuc2NeuAc
SVSHSAQPPAHQPPMISTK	180417_05	11656	32.37	1104.82	3	3312.44	1312.44	22020000	HexNAc2Hex2NeuAc2
SVSHSAQPPAHQPPMISTK	180417_05	11665	32.38	901.646	4	3603.56	1603.56	22030000	HexNAc2Hex2NeuAc3
SVSHSAQPPAHQPPMISTK	180417_05	11670	32.38	875.039	3	2623.1	623.1	-1	<not-identified>
AVAVTLQSH	180417_05	11675	32.4	624.949	3	1872.83	947.323	11020000	HexNAcHexNeuAc2
HLC(Carbamidomethyl)HTPEPTC(Carbamidomethyl)PPHEFK	180417_05	11743	32.57	825.593	4	3299.35	1312.46	22020000	HexNAc2Hex2NeuAc2
TQFSDSTVQSGGSHTALGDR	180417_05	11811	32.7	987.406	4	3946.6	1895.66	-1	<not-identified>
VGPVRPTGQDWNHTPQK	180417_05	11857	32.78	891.141	4	3561.54	1644.57	-1	<not-identified>
SVSHSAQPPAHQPPMISTK	180417_05	11861	32.8	828.871	4	3312.46	1312.46	22020000	HexNAc2Hex2NeuAc2
AVAVTLQSH	180417_05	11894	32.88	1212.77	3	3636.29	2710.78	-1	<not-identified>
SVSHSAQPPAHQPPMISTK	180417_05	11912	32.92	901.645	4	3603.56	1603.56	22030000	HexNAc2Hex2NeuAc3
TQFSDSTVQSGGSHTALGDR	180417_05	11925	32.93	987.155	4	3945.6	1894.66	22040000	HexNAc2Hex2NeuAc4
AVAVTLQSH	180417_05	11933	32.95	760.664	3	2279.98	1354.47	22021000	HexNAc2Hex2NeuAcNeuAcAc
AVAVTLQSH	180417_05	11942	32.97	1160.46	3	3479.38	2553.87	-1	<not-identified>
SVSHSAQPPAHQPPMISTK	180417_05	11948	32.98	1104.83	3	3312.47	1312.47	22020000	HexNAc2Hex2NeuAc2
DALPDNENKKPTAIPK	180417_05	11966	33.02	675.32	4	2698.26	947.324	11020000	HexNAcHexNeuAc2
AVAVTLQSH	180417_05	11971	33.02	809.347	3	2426.03	1500.52	22121000	HexNAc2Hex2FucNeuAcNeuAcAc
TQFSDSTVQSGGSHTALGDR	180417_05	11976	33.03	987.402	4	3946.59	1895.64	-1	<not-identified>
AVAVTLQSH	180417_05	12028	33.13	767.991	3	2301.96	1376.45	22021010	HexNAc2Hex2NeuAcNeuAcAcNa
ESTPPPHVMR	180417_05	12028	33.13	767.991	3	2301.96	1151.39	-1	<not-identified>
VGPVRPTGQDWNHTPQK	180417_05	12350	33.75	818.369	4	3270.46	1353.48	-1	<not-identified>
EGLLKPQTPSYNHHTR	180417_05	12398	33.85	769.682	3	2307.03	429.068	-1	<not-identified>
VGPVRPTGQDWNHTPQK	180417_05	12457	33.97	1090.82	3	3270.46	1353.49	-1	<not-identified>
VGPVRPTGQDWNHTPQK	180417_05	12466	34	953.661	4	3811.62	1894.65	22040000	HexNAc2Hex2NeuAc4
AVAVTLQSH	180417_05	12481	34.02	823.354	3	2468.05	1542.54	22122000	HexNAc2Hex2FucNeuAcAc2
VGPVRPTGQDWNHTPQK	180417_05	12487	34.03	953.663	4	3811.63	1894.66	22040000	HexNAc2Hex2NeuAc4
AVAVTLQSH	180417_05	12500	34.05	1067.41	3	3200.22	2274.71	-1	<not-identified>
VGPVRPTGQDWNHTPQK	180417_05	12635	34.3	818.369	4	3270.46	1353.48	-1	<not-identified>
EGLLKPQTPSYNHHTR	180417_05	12678	34.38	755.529	5	3773.62	1895.66	-1	<not-identified>
EGLLKPQTPSYNHHTR	180417_05	12726	34.47	755.329	5	3772.62	1894.65	22040000	HexNAc2Hex2NeuAc4
HLVTTVPKDPEAAE	180417_05	12736	34.48	940.055	3	2818.15	1311.37	-1	<not-identified>
EGLLKPQTPSYNHHTR	180417_05	12740	34.5	871.383	4	3482.51	1604.55	-1	<not-identified>
EGLLKPQTPSYNHHTR	180417_05	12759	34.53	871.133	4	3481.51	1603.55	22030000	HexNAc2Hex2NeuAc3
VGPVRPTGQDWNHTPQK	180417_05	12803	34.62	881.39	4	3522.54	1605.56	-1	<not-identified>
AVAVTLQSH	180417_05	12816	34.63	735.985	3	2205.94	1280.43	11031000	HexNAcHexNeuAc2NeuAcAc
VGPVRPTGQDWNHTPQK	180417_05	12844	34.7	880.887	4	3520.53	1603.55	22030000	HexNAc2Hex2NeuAc3
EGLLKPQTPSYNHHTR	180417_05	12890	34.78	943.909	4	3772.61	1894.65	22040000	HexNAc2Hex2NeuAc4
EGLLKPQTPSYNHHTR	180417_05	12944	34.88	990.689	4	3959.73	2081.77	-1	<not-identified>
EGLLKPQTPSYNHHTR	180417_05	13010	35.02	755.328	5	3772.61	1894.65	22040000	HexNAc2Hex2NeuAc4
HLVTTVPKDPEAAE	180417_05	13048	35.08	818.705	3	2454.1	947.32	11020000	HexNAcHexNeuAc2
AVAVTLQSH	180417_05	13104	35.18	774.669	3	2321.99	1396.48	22022000	HexNAc2Hex2NeuAcAc2
EGLLKPQTPSYNHHTR	180417_05	13108	35.2	871.133	4	3481.51	1603.55	22030000	HexNAc2Hex2NeuAc3
VGPVRPTGQDWNHTPQK	180417_05	13142	35.27	881.139	4	3521.53	1604.56	-1	<not-identified>
EGLLKPQTPSYNHHTR	180417_05	13187	35.35	943.909	4	3772.61	1894.65	22040000	HexNAc2Hex2NeuAc4
EGLLKPQTPSYNHHTR	180417_05	13193	35.37	871.385	4	3482.52	1604.56	-1	<not-identified>
EGLLKPQTPSYNHHTR	180417_05	13293	35.55	755.527	5	3773.61	1895.64	-1	<not-identified>
GPLPVQPTADTTTHVTPR	180417_05	13298	35.57	964.922	4	3856.67	1968.67	33030000	HexNAc3Hex3NeuAc3
EGLLKPQTPSYNHHTR	180417_05	13437	35.83	944.159	4	3773.61	1895.65	-1	<not-identified>
VEDLHVGATVAPSSR	180417_05	13453	35.87	732.015	3	2194.03	656.232	11010000	HexNAcHexNeuAc
VWGQGQSPRPENSLER	180417_05	13503	35.97	1057.14	3	3169.4	1329.49	-1	<not-identified>
NKYPDAVATWLNPDPSQK	180417_05	13610	36.18	1070.81	3	3210.41	1166.39	-1	<not-identified>
VWGQGQSPRPENSLER	180417_05	13610	36.18	1070.81	3	3210.41	1370.5	32110000	HexNAc3Hex2FucNeuAc
GPLPVQPTADTTTHVTPR	180417_05	13620	36.2	873.357	3	2618.06	730.065	-1	<not-identified>
GPLPVQPTADTTTHVTPR	180417_05	13634	36.22	965.081	3	2893.23	1005.24	-1	<not-identified>
GPLPVQPTADTTTHVTPR	180417_05	13766	36.47	1067.49	3	3200.44	1312.45	22020000	HexNAc2Hex2NeuAc2
EGLLKPQTPSYNHHTR	180417_05	13792	36.52	944.158	4	3773.61	1895.65	-1	<not-identified>
GPLPVQPTADTTTHVTPR	180417_05	13800	36.53	800.016	3	2398.03	510.04	-1	<not-identified>
AVAVTLQSH	180417_05	13811	36.57	1125.48	3	3374.43	2448.92	-1	<not-identified>
AVAVTLQSH	180417_05	13881	36.7	749.988	3	2247.95	1322.44	11032000	HexNAcHexNeuAcNeuAcAc2
AVAVTLQSH	180417_05	13948	36.85	957.385	4	3826.52	2901.01	-1	<not-identified>
GPLPVQPTADTTTHVTPR	180417_05	14035	37.02	1067.49	3	3200.44	1312.45	22020000	HexNAc2Hex2NeuAc2
DKEC(Carbamidomethyl)TEC(Carbamidomethyl)DPLPNPSLTAR	180417_05	14053	37.05	886.387	3	2657.15	554.199	-1	<not-identified>
GPLPVQPTADTTTHVTPR	180417_05	14071	37.08	1165.19	3	3493.57	1605.57	-1	<not-identified>
DKEC(Carbamidomethyl)TEC(Carbamidomethyl)DPLPNPSLTAR	180417_05	14072	37.1	818.363	3	2453.07	350.126	-1	<not-identified>
GPLPVQPTADTTTHVTPR	180417_05	14120	37.18	1067.82	3	3201.45	1313.46	-1	<not-identified>
GPLPVQPTADTTTHVTPR	180417_05	14121	37.18	1164.52	3	3491.53	1603.54	22030000	HexNAc2Hex2NeuAc3
LESPSPGTSWTTR	180417_05	14135	37.22	1105.12	3	3313.35	1894.66	22040000	HexNAc2Hex2NeuAc4
GPLPVQPTADTTTHVTPR	180417_05	14210	37.37	1164.85	3	3492.55	1604.56	-1	<not-identified>
AVAVTLQSH	180417_05	14396	37.77	980.079	3	2938.22	2012.71	-1	<not-identified>
IATTSSSVLLSPSAVESR	180417_05	14531	38.07	1477.63	3	4430.87	2625.91	-1	<not-identified>
LESPSPGTSWTTR	180417_05	14594	38.2	1008.09	3	3022.25	1603.56	22030000	HexNAc2Hex2NeuAc3
AVAVTLQSH	180417_05	14703	38.4	1235.54	4	4939.13	4013.62	-1	<not-identified>
LESPSPGTSWTTR	180417_05	14728	38.45	1008.42	3	3023.24	1604.54	-1	<not-identified>
LESPSPGTSWTTR	180417_05	14751	38.5	1008.08	3	3022.21	1603.52	-1	<not-identified>
DKEC(Carbamidomethyl)TEC(Carbamidomethyl)DPLPNPSLTAR	180417_05	14764	38.53	817.698	3	2451.08	348.132	-1	<not-identified>
AVAVTLQSH	180417_05	14817	38.63	823.354	3	2468.05	1542.54	22122000	HexNAc2Hex2FucNeuAcAc2
LESPSPGTSWTTR	180417_05	14821	38.65	911.055	3	2731.15	1312.46	22020000	HexNAc2Hex2NeuAc2
AVAVTLQSH	180417_05	14903	38.82	816.676	3	2448.01	1522.5	22121010	HexNAc2Hex2FucNeuAcNeuAcAcNa
HLC(Carbamidomethyl)HTPEPTC(Carbamidomethyl)PPHEFK	180417_05	14937	38.88	847.031	3	2539.08	552.183	-1	<not-identified>
VWGQGQSPRPENSLER	180417_05	14939	38.88	1026.07	3	3076.2	1236.29	-1	<not-identified>
VWGQGQSPRPENSLER	180417_05	14988	38.98	929.749	3	2787.23	947.323	11020000	HexNAcHexNeuAc2
HLC(Carbamidomethyl)HTPEPTC(Carbamidomethyl)PPHEFK	180417_05	15042	39.08	847.363	3	2540.07	553.179	-1	<not-identified>
AVAVTLQSH	180417_05	15076	39.15	1140.99	4	4560.96	3635.45	-1	<not-identified>
SVSHSAQPPAHQPPMISTK	180417_05	15093	39.18	974.165	4	3893.64	1893.63	-1	<not-identified>
AVAVTLQSH	180417_05	15134	39.27	774.667	3	2321.99	1396.48	22022000	HexNAc2Hex2NeuAcAc2
AVAVTLQSH	180417_05	15148	39.3	760.665	3	2279.98	1354.47	22021000	HexNAc2Hex2NeuAcNeuAcAc
VWGQGQSPRPENSLER	180417_05	15174	39.35	1027.45	4	4106.79	2266.88	-1	<not-identified>
VWGQGQSPRPENSLER	180417_05	15202	39.4	930.083	3	2788.24	948.326	-1	<not-identified>
AVAVTLQSH	180417_05	15228	39.45	823.354	3	2468.05	1542.54	22122000	HexNAc2Hex2FucNeuAcAc2
AVAVTLQSH	180417_05	15260	39.52	914.376	4	3654.48	2728.97	-1	<not-identified>
AVAVTLQSH	180417_05	15326	39.65	830.682	3	2490.03	1564.52	-1	<not-identified>
AVAVTLQSH	180417_05	15343	39.68	914.386	4	3654.52	2729.01	-1	<not-identified>
VWGQGQSPRPENSLER	180417_05	15365	39.73	930.416	3	2789.23	949.323	-1	<not-identified>
SVSHSAQPPAHQPPMISTK	180417_05	15382	39.77	1079.8	3	3237.4	1237.39	-1	<not-identified>
VEDLHVGATVAPSSR	180417_05	15391	39.78	1022.78	3	3066.33	1528.53	-1	<not-identified>
AVAVTLQSH	180417_05	15406	39.82	774.668	3	2321.99	1396.48	22022000	HexNAc2Hex2NeuAcAc2
AVAVTLQSH	180417_05	15423	39.85	760.665	3	2279.98	1354.47	22021000	HexNAc2Hex2NeuAcNeuAcAc
AVAVTLQSH	180417_05	15486	39.98	823.354	3	2468.05	1542.54	22122000	HexNAc2Hex2FucNeuAcAc2
AVAVTLQSH	180417_05	15527	40.05	638.953	3	1914.84	989.334	11021000	HexNAcHexNeuAcNeuAcAc
AVAVTLQSH	180417_05	15724	40.43	812.36	3	2435.07	1509.56	-1	<not-identified>
AVAVTLQSH	180417_05	15777	40.55	774.668	3	2321.99	1396.48	22022000	HexNAc2Hex2NeuAcAc2
AVAVTLQSH	180417_05	15806	40.62	1124.45	3	3371.35	2445.84	-1	<not-identified>
AVAVTLQSH	180417_05	15811	40.62	957.37	3	2870.09	1944.58	-1	<not-identified>
AHEVSEISVRTVYPPEE	180417_05	15863	40.72	1196.72	4	4783.86	2841.91	-1	<not-identified>
AVAVTLQSH	180417_05	15866	40.72	1124.47	3	3371.4	2445.89	-1	<not-identified>
AVAVTLQSH	180417_05	15872	40.73	781.995	3	2343.97	1418.46	22022010	HexNAc2Hex2NeuAcAc2Na
SVSHSAQPPAHQPPMISTK	180417_05	15934	40.85	1050.47	3	3149.39	1149.39	-1	<not-identified>
IATTSSSVLLSPSAVESR	180417_05	16011	41	1258.56	3	3773.66	1968.7	33030000	HexNAc3Hex3NeuAc3
AVAVTLQSH	180417_05	16034	41.05	1103.98	4	4412.88	3487.37	-1	<not-identified>
AVAVTLQSH	180417_05	16048	41.07	1103.47	4	4410.87	3485.36	-1	<not-identified>
AVAVTLQSH	180417_05	16053	41.08	774.668	3	2321.99	1396.48	22022000	HexNAc2Hex2NeuAcAc2
SVSHSAQPPAHQPPMISTK	180417_05	16084	41.13	901.638	4	3603.53	1603.53	-1	<not-identified>
GSQVLESTPPPHVMR	180417_05	16107	41.18	901.39	4	3602.54	1967.7	-1	<not-identified>
AHEVSEISVRTVYPPEEETGER	180417_05	16143	41.25	1102.7	4	4407.77	1893.56	-1	<not-identified>
AVAVTLQSH	180417_05	16217	41.4	1183.01	4	4729.03	3803.52	-1	<not-identified>
AHEVSEISVRTVYPPEEETGER	180417_05	16223	41.4	1103.22	4	4409.86	1895.65	-1	<not-identified>
WTHSYL	180417_05	16496	41.93	1010.15	3	3028.44	2222.06	-1	<not-identified>
DLSDALPDNENKKPTAIPK	180417_05	16511	41.97	1004.74	3	3012.2	946.123	-1	<not-identified>
WTHSYL	180417_05	16531	42	706.951	3	2118.84	1312.46	22020000	HexNAc2Hex2NeuAc2
AHEVSEISVRTVYPPEEETGER	180417_05	16536	42.02	1102.98	4	4408.88	1894.67	-1	<not-identified>
WTHSYL	180417_05	16566	42.08	707.285	3	2119.84	1313.46	-1	<not-identified>
AVAVTLQSH	180417_05	16567	42.08	1160.79	3	3480.34	2554.83	-1	<not-identified>
DKEC(Carbamidomethyl)TEC(Carbamidomethyl)DPLPNPSLTAR	180417_05	16599	42.15	1041.42	3	3122.23	1019.29	-1	<not-identified>
AVAVTLQSH	180417_05	16608	42.17	749.989	3	2247.95	1322.44	11032000	HexNAcHexNeuAcNeuAcAc2
DLSDALPDNENKKPTAIPK	180417_05	16658	42.27	1005.14	3	3013.39	947.314	11020000	HexNAcHexNeuAc2
AHEVSEISVRTVYPPEEETGER	180417_05	16705	42.35	882.977	5	4410.86	1896.65	-1	<not-identified>
SDHSKPTAETVAPDNTAIPSLR	180417_05	16745	42.43	1051.46	4	4202.81	1895.65	-1	<not-identified>
WTHSYL	180417_05	16751	42.43	753.826	4	3012.28	2205.9	-1	<not-identified>
SDHSKPTAETVAPDNTAIPSLR	180417_05	16760	42.47	1052.16	4	4205.63	1898.47	-1	<not-identified>
AVAVTLQSH	180417_05	16763	42.47	754.605	4	3015.4	2089.89	-1	<not-identified>
SDALPDNENKKPTAIPK	180417_05	16763	42.47	754.605	4	3015.4	1177.43	-1	<not-identified>
AHEVSEISVRTVYPPEE	180417_05	16791	42.52	960.163	4	3837.63	1895.67	-1	<not-identified>
AHEVSEISVRTVYPPEEETGER	180417_05	16799	42.53	1102.97	4	4408.87	1894.66	22040000	HexNAc2Hex2NeuAc4
GNFLTGLGHR	180417_05	16841	42.63	1108.47	4	4430.85	3359.28	-1	<not-identified>
AHEVSEISVRTVYPPEEETGER	180417_05	16851	42.65	882.78	5	4409.87	1895.66	-1	<not-identified>
AVAVTLQSH	180417_05	16875	42.7	749.989	3	2247.95	1322.44	11032000	HexNAcHexNeuAcNeuAcAc2
GNFLTGLGHR	180417_05	16914	42.77	738.331	3	2212.98	1141.41	-1	<not-identified>
AHEVSEISVRTVYPPEE	180417_05	16958	42.87	960.159	4	3837.62	1895.66	-1	<not-identified>
RDFTAAFPR	180417_05	16967	42.88	798.679	3	2394.02	1313.47	22210000	HexNAc2Hex2Fuc2NeuAc
SLTVSLGPVSK	180417_05	17013	42.97	807.034	3	2419.09	1331.45	-1	<not-identified>
AHEVSEISVRTVYPPEE	180417_05	17018	42.98	1279.54	3	3836.61	1894.65	22040000	HexNAc2Hex2NeuAc4
AHEVSEISVRTVYPPEEETGER	180417_05	17029	43	883.178	5	4411.86	1897.65	-1	<not-identified>
AHEVSEISVRTVYPPEEETGER	180417_05	17036	43.02	1470.63	3	4409.89	1895.67	-1	<not-identified>
DHSKPTAETVAPDNTAIPSLR	180417_05	17037	43.02	1029.45	4	4114.78	1894.65	22040000	HexNAc2Hex2NeuAc4
AHEVSEISVRTVYPPEE	180417_05	17075	43.08	959.905	4	3836.6	1894.64	22040000	HexNAc2Hex2NeuAc4
PRTLPPLPPGPTPAQQPGR	180417_05	17105	43.15	968.949	4	3872.77	1895.67	-1	<not-identified>
AQDGGPVGTELFR	180417_05	17106	43.15	892.696	3	2676.07	1329.4	-1	<not-identified>
DFTAAFPR	180417_05	17106	43.15	892.696	3	2676.07	1751.62	44010000	HexNAc4Hex4NeuAc
PRTLPPLPPGPTPAQQPGR	180417_05	17117	43.17	969.4	4	3874.58	1897.48	-1	<not-identified>
SDALPDNENKKPTAIPK	180417_05	17133	43.2	928.771	3	2784.3	946.332	-1	<not-identified>
AHEVSEISVRTVYPPEE	180417_05	17161	43.25	1279.56	3	3836.66	1894.7	-1	<not-identified>
AHEVSEISVRTVYPPEEETGER	180417_05	17165	43.25	1102.98	4	4408.88	1894.67	-1	<not-identified>
PRTLPPLPPGPTPAQQPGR	180417_05	17192	43.3	968.691	4	3871.74	1894.64	22040000	HexNAc2Hex2NeuAc4
AHEVSEISVRTVYPPEE	180417_05	17272	43.45	1032.68	4	4127.7	2185.74	-1	<not-identified>
ALSPQQVTRLPSGY	180417_05	17284	43.47	1065.48	3	3194.42	1677.61	-1	<not-identified>
LSDHSKPTAETVAPDNTAIPSLR	180417_05	17360	43.62	1079.98	4	4316.9	1896.66	-1	<not-identified>
ALSPQQVTRLPSGY	180417_05	17361	43.62	1162.51	3	3485.51	1968.7	33030000	HexNAc3Hex3NeuAc3
AHEVSEISVRTVYPPEE	180417_05	17372	43.63	959.907	4	3836.6	1894.65	22040000	HexNAc2Hex2NeuAc4
AHEVSEISVRTVYPPEE	180417_05	17387	43.65	1279.54	3	3836.62	1894.66	22040000	HexNAc2Hex2NeuAc4
AQDGGPVGTELFR	180417_05	17422	43.73	906.395	3	2717.17	1370.5	32110000	HexNAc3Hex2FucNeuAc
SDALPDNENKKPTAIPK	180417_05	17429	43.73	928.771	3	2784.3	946.331	-1	<not-identified>
DFTAAFPR	180417_05	17477	43.85	770.99	3	2310.96	1386.5	33010000	HexNAc3Hex3NeuAc
PRTLPPLPPGPTPAQQPGR	180417_05	17484	43.87	968.698	4	3871.77	1894.67	-1	<not-identified>
AHEVSEISVRTVYPP	180417_05	17493	43.88	1194.51	3	3581.53	1897.66	-1	<not-identified>
M(Acetyl)DAVSQVPMEVVLPK	180417_05	17493	43.88	1194.51	3	3581.53	1896.66	-1	<not-identified>
ALSPQQVTRLPSGY	180417_05	17510	43.92	1040.79	3	3120.36	1603.55	22030000	HexNAc2Hex2NeuAc3
AHEVSEISVRTVYPP	180417_05	17531	43.97	1193.52	3	3578.54	1894.67	-1	<not-identified>
M(Acetyl)DAVSQVPMEVVLPK	180417_05	17531	43.97	1193.52	3	3578.54	1893.68	-1	<not-identified>
WTHSYL	180417_05	17536	43.97	1010.15	4	4037.6	3231.21	-1	<not-identified>
DFTAAFPR	180417_05	17548	44	973.647	5	4864.21	3939.75	-1	<not-identified>
AHEVSEISVRTVYPP	180417_05	17588	44.07	895.634	4	3579.51	1895.64	-1	<not-identified>
M(Acetyl)DAVSQVPMEVVLPK	180417_05	17588	44.07	895.634	4	3579.51	1894.65	22040000	HexNAc2Hex2NeuAc4
AHEVSEISVRTVYPPEE	180417_05	17596	44.08	1031.67	4	4123.66	2181.7	-1	<not-identified>
AHEVSEISVRTVYPP	180417_05	17603	44.1	895.384	4	3578.51	1894.64	22040000	HexNAc2Hex2NeuAc4
M(Acetyl)DAVSQVPMEVVLPK	180417_05	17603	44.1	895.384	4	3578.51	1893.65	-1	<not-identified>
AHEVSEISVRTVYPPEE	180417_05	17640	44.17	959.907	4	3836.61	1894.65	22040000	HexNAc2Hex2NeuAc4
AHEVSEISVRTVYPPEE	180417_05	17682	44.25	1279.54	3	3836.62	1894.66	22040000	HexNAc2Hex2NeuAc4
DFTAAFPR	180417_05	17698	44.28	989.735	3	2967.19	2042.73	44020000	HexNAc4Hex4NeuAc2
AHEVSEISVRTVYPPEE	180417_05	17727	44.33	1279.87	3	3837.6	1895.64	-1	<not-identified>
DFTAAFPR	180417_05	17746	44.37	770.989	3	2310.95	1386.5	33010000	HexNAc3Hex3NeuAc
AHEVSEISVRTVYPP	180417_05	17810	44.5	1193.52	3	3578.53	1894.66	22040000	HexNAc2Hex2NeuAc4
M(Acetyl)DAVSQVPMEVVLPK	180417_05	17810	44.5	1193.52	3	3578.53	1893.67	-1	<not-identified>
ALSPQQVTRLPSGY	180417_05	17826	44.53	1040.8	3	3120.37	1603.56	22030000	HexNAc2Hex2NeuAc3
AHEVSEISVRTVYPP	180417_05	17832	44.53	1291.54	3	3872.6	2188.73	-1	<not-identified>
M(Acetyl)DAVSQVPMEVVLPK	180417_05	17832	44.53	1291.54	3	3872.6	2187.74	-1	<not-identified>
ALSPQQVTRLPSGY	180417_05	17857	44.58	943.762	3	2829.27	1312.46	22020000	HexNAc2Hex2NeuAc2
ALSPQQVTRLPSGY	180417_05	17881	44.63	1040.5	3	3119.49	1602.68	-1	<not-identified>
AHEVSEISVRTVYPP	180417_05	17904	44.68	895.386	4	3578.52	1894.65	22040000	HexNAc2Hex2NeuAc4
DKEC(Carbamidomethyl)TEC(Carbamidomethyl)DPLPNPSLTAR	180417_05	17976	44.82	919.133	4	3673.51	1570.56	-1	<not-identified>
DFTAAFPR	180417_05	17983	44.83	989.732	3	2967.18	2042.72	44020000	HexNAc4Hex4NeuAc2
DKEC(Carbamidomethyl)TEC(Carbamidomethyl)DPLPNPSLTAR	180417_05	17997	44.85	919.377	4	3674.49	1571.54	-1	<not-identified>
DFTAAFPR	180417_05	18044	44.95	973.416	3	2918.23	1993.78	-1	<not-identified>
ATAPTAQAPR	180417_05	18085	45.03	765.996	3	2295.97	1312.45	22020000	HexNAc2Hex2NeuAc2
ATAPTAQAPR	180417_05	18169	45.23	766.331	3	2296.98	1313.45	-1	<not-identified>
ATAPTAQAPR	180417_05	18190	45.27	863.365	3	2588.08	1604.55	-1	<not-identified>
DFTAAFPR	180417_05	18200	45.3	868.021	3	2602.05	1677.59	33020000	HexNAc3Hex3NeuAc2
ATAPTAQAPR	180417_05	18203	45.3	863.026	3	2587.06	1603.54	22030000	HexNAc2Hex2NeuAc3
AVAVTLQSH	180417_05	18352	45.57	1240.53	3	3719.59	2794.08	-1	<not-identified>
ALSPQQVTRLPSGY	180417_05	18354	45.58	943.761	3	2829.27	1312.46	22020000	HexNAc2Hex2NeuAc2
DFTAAFPR	180417_05	18472	45.82	868.021	3	2602.05	1677.59	33020000	HexNAc3Hex3NeuAc2
LLSDHSKPTAETVAPDNTAIPSLR	180417_05	18550	45.97	1035.23	4	4137.88	1604.56	-1	<not-identified>
LLSDHSKPTAETVAPDNTAIPSLR	180417_05	18574	46.02	1035.48	4	4138.91	1605.58	-1	<not-identified>
LLSDHSKPTAETVAPDNTAIPSLR	180417_05	18746	46.35	1477	3	4428.98	1895.65	-1	<not-identified>
LLSDHSKPTAETVAPDNTAIPSLR	180417_05	18759	46.37	886.602	5	4428.98	1895.65	-1	<not-identified>
LLSDHSKPTAETVAPDNTAIPSLR	180417_05	18818	46.5	886.399	5	4427.97	1894.64	22040000	HexNAc2Hex2NeuAc4
PRTLPPLPPGPTPAQQPGR	180417_05	18824	46.5	979.194	4	3913.76	1936.65	-1	<not-identified>
WTHSYL	180417_05	18853	46.57	1042.74	3	3126.21	2319.83	-1	<not-identified>
FVGGAENTAHPR	180417_05	19182	47.2	1067.43	4	4266.7	3011.08	-1	<not-identified>
PRTLPPLPPGPTPAQQPGR	180417_05	19280	47.42	979.197	4	3913.77	1936.66	-1	<not-identified>
SLTVSLGPVSKTEGFPK	180417_05	19339	47.52	944.18	4	3773.7	2026.73	43120000	HexNAc4Hex3FucNeuAc2
SLTVSLGPVSKTEGFPK	180417_05	19356	47.55	944.431	4	3774.7	2027.74	-1	<not-identified>
SLTVSLGPVSKTEGFPK	180417_05	19408	47.65	954.687	4	3815.72	2068.76	-1	<not-identified>
SLTVSLGPVSKTEGFPK	180417_05	19417	47.67	1272.25	3	3814.73	2067.77	-1	<not-identified>
SLTVSLGPVSKTEGFPK	180417_05	19430	47.7	1002.45	4	4006.77	2259.8	-1	<not-identified>
PRTLPPLPPGPTPAQQPGR	180417_05	19455	47.75	989.95	4	3956.78	1979.68	-1	<not-identified>
DFTAAFPR	180417_05	19642	48.12	624.6	3	1871.79	947.328	11020000	HexNAcHexNeuAc2
DFTAAFPR	180417_05	19689	48.22	894.084	3	2680.24	1755.78	-1	<not-identified>
SDALPDNENKKPTAIPK	180417_05	19732	48.3	1147.51	3	3440.5	1602.54	-1	<not-identified>
KAPPPSGASQTIK	180417_05	19785	48.38	865.064	3	2593.18	1311.46	-1	<not-identified>
LSEPGLIC(Carbamidomethyl)PDSTPPPHLR	180417_05	19799	48.42	825.624	4	3299.48	1313.46	22210000	HexNAc2Hex2Fuc2NeuAc
LSEPGLIC(Carbamidomethyl)PDSTPPPHLR	180417_05	19877	48.57	1100.16	3	3298.46	1312.45	22020000	HexNAc2Hex2NeuAc2
SDALPDNENKKPTAIPK	180417_05	19916	48.63	1244.54	3	3731.6	1893.64	-1	<not-identified>
SDALPDNENKKPTAIPK	180417_05	19963	48.73	1244.87	3	3732.61	1894.64	22040000	HexNAc2Hex2NeuAc4
SLTLGIEPVSPTSLR	180417_05	20139	49.08	1030.94	4	4120.73	2550.84	-1	<not-identified>
SLTLGIEPVSPTSLR	180417_05	20149	49.1	1030.95	4	4120.77	2550.89	33050000	HexNAc3Hex3NeuAc5
SLTLGIEPVSPTSLR	180417_05	20160	49.13	1031.2	4	4121.76	2551.88	-1	<not-identified>
GQQGQGPWGTGGTPHGPR	180417_05	20169	49.15	1314.56	3	3941.66	2166.82	-1	<not-identified>
SLTVSLGPVSKTEGFPK	180417_05	20187	49.18	939.927	4	3756.69	2009.72	-1	<not-identified>
SLTVSLGPVSKTEGFPK	180417_05	20229	49.27	1252.9	3	3756.67	2009.71	-1	<not-identified>
LSEPGLIC(Carbamidomethyl)PDSTPPPHLR	180417_05	20261	49.32	978.452	3	2933.34	947.33	11020000	HexNAcHexNeuAc2
LEGLLESPSPGTSWTTR	180417_05	20438	49.68	1461.27	3	4381.79	2550.87	33050000	HexNAc3Hex3NeuAc5
PRTLPPLPPGPTPAQQPGR	180417_05	20590	50	989.949	4	3956.77	1979.67	-1	<not-identified>
LEGLLESPSPGTSWTTR	180417_05	20676	50.18	1461.6	3	4382.79	2551.87	-1	<not-identified>
PRTLPPLPPGPTPAQQPGR	180417_05	20705	50.23	989.7	4	3955.78	1978.67	-1	<not-identified>
AQDGGPVGTELF	180417_05	20714	50.25	854.361	3	2561.07	1370.5	32110000	HexNAc3Hex2FucNeuAc
SLTLGIEPVSPTSLR	180417_05	20732	50.28	958.423	4	3830.67	2260.79	-1	<not-identified>
SLTVSLGPVSKTEGFPK	180417_05	20735	50.3	1336.25	3	4006.73	2259.77	33040000	HexNAc3Hex3NeuAc4
SLTVSLGPVSKTEGFPK	180417_05	20760	50.35	1002.44	4	4006.75	2259.78	33040000	HexNAc3Hex3NeuAc4
SLTVSLGPVSKTEGFPK	180417_05	20768	50.37	930.171	4	3717.66	1970.7	-1	<not-identified>
SLTLGIEPVSPTSLR	180417_05	20881	50.6	1180.2	3	3538.58	1968.69	33030000	HexNAc3Hex3NeuAc3
LEGLLESPSPGTSWTTR	180417_05	20886	50.6	1364.57	3	4091.71	2260.79	-1	<not-identified>
SLTVSLGPVSKTEGFPK	180417_05	20890	50.62	929.668	4	3715.65	1968.69	33030000	HexNAc3Hex3NeuAc3
SLTLGIEPVSPTSLR	180417_05	20917	50.67	885.398	4	3538.57	1968.69	33030000	HexNAc3Hex3NeuAc3
SLTVSLGPVSKTEGFPK	180417_05	20949	50.73	1131.53	3	3392.57	1645.6	-1	<not-identified>
LEGLLESPSPGTSWTTR	180417_05	20970	50.78	1023.43	4	4090.7	2259.77	33040000	HexNAc3Hex3NeuAc4
PRTLPPLPPGPTPAQQPGR	180417_05	20999	50.83	989.95	4	3956.78	1979.67	-1	<not-identified>
LEGLLESPSPGTSWTTR	180417_05	21028	50.9	1267.55	3	3800.64	1969.72	33220000	HexNAc3Hex3Fuc2NeuAc2
LEGLLESPSPGTSWTTR	180417_05	21036	50.92	1364.24	3	4090.71	2259.78	33040000	HexNAc3Hex3NeuAc4
LEGLLESPSPGTSWTTR	180417_05	21075	51	1023.68	4	4091.68	2260.76	-1	<not-identified>
LEGLLESPSPGTSWTTR	180417_05	21196	51.23	950.907	4	3800.61	1969.68	-1	<not-identified>
LEGLLESPSPGTSWTTR	180417_05	21215	51.27	1267.21	3	3799.62	1968.7	33030000	HexNAc3Hex3NeuAc3
LEGLLESPSPGTSWTTR	180417_05	21343	51.52	950.658	4	3799.61	1968.69	33030000	HexNAc3Hex3NeuAc3
SLTVSLGPVSKTEGFPK	180417_05	21369	51.57	1214.24	3	3640.71	1893.75	-1	<not-identified>
SLTVSLGPVSKTEGFPK	180417_05	21403	51.63	1214.89	3	3642.65	1895.69	-1	<not-identified>
SLTVSLGPVSKTEGFPK	180417_05	21407	51.63	1117.51	3	3350.52	1603.55	22030000	HexNAc2Hex2NeuAc3
DGGFDLSDALPDNENKKPTAIPK	180417_05	21412	51.65	1012.2	4	4045.77	1603.56	22030000	HexNAc2Hex2NeuAc3
LLSDHSKPTAETVAPDNTAIPSL	180417_05	21496	51.82	1424.63	3	4271.87	1894.64	22040000	HexNAc2Hex2NeuAc4
LEGLLESPSPGTSWTTR	180417_05	21531	51.88	1267.21	3	3799.62	1968.69	33030000	HexNAc3Hex3NeuAc3
DGGFDLSDALPDNENKKPTAIPK	180417_05	21908	52.63	1084.97	4	4336.86	1894.65	22040000	HexNAc2Hex2NeuAc4
LEGLLESPSPGTSWTTR	180417_05	22034	52.88	1364.57	3	4091.7	2260.78	-1	<not-identified>
SLTVSLGPVSKTEGFPK	180417_05	22053	52.93	994.938	4	3976.73	2229.77	-1	<not-identified>
LEGLLESPSPGTSWTTR	180417_05	22222	53.27	1023.68	4	4091.71	2260.78	-1	<not-identified>
NKYPDAVATWLNPDPSQK	180417_05	23362	55.48	1338.57	3	4013.68	1969.67	-1	<not-identified>
DVSTPPTVLPDNFPR	180417_05	23460	55.68	1184.5	3	3551.48	1896.64	-1	<not-identified>
LEGLLESPSPGTSWTTR	180417_05	23689	56.15	1242.53	3	3725.58	1894.66	22040000	HexNAc2Hex2NeuAc4
LEGLLESPSPGTSWTTR	180417_05	23693	56.15	1048.47	3	3143.39	1312.47	22020000	HexNAc2Hex2NeuAc2
DVSTPPTVLPDNFPR	180417_05	23731	56.23	888.381	4	3550.5	1895.66	-1	<not-identified>
LEGLLESPSPGTSWTTR	180417_05	23737	56.25	1145.49	3	3434.47	1603.55	22030000	HexNAc2Hex2NeuAc3
LEGLLESPSPGTSWTTR	180417_05	23813	56.38	932.401	4	3726.58	1895.66	-1	<not-identified>
LEGLLESPSPGTSWTTR	180417_05	23950	56.68	1048.47	3	3143.39	1312.46	22020000	HexNAc2Hex2NeuAc2
LEGLLESPSPGTSWTTR	180417_05	24028	56.83	1145.5	3	3434.48	1603.56	22030000	HexNAc2Hex2NeuAc3
LEGLLESPSPGTSWTTR	180417_05	24049	56.87	1242.52	3	3725.56	1894.63	22040000	HexNAc2Hex2NeuAc4
LEGLLESPSPGTSWTTR	180417_05	24064	56.9	1243.5	3	3728.5	1897.57	-1	<not-identified>
LEGLLESPSPGTSWTTR	180417_05	24097	56.97	1242.54	3	3725.61	1894.69	-1	<not-identified>
DVSTPPTVLPDNFPR	180417_05	24313	57.4	989.772	3	2967.3	1312.46	22020000	HexNAc2Hex2NeuAc2
DVSTPPTVLPDNFPR	180417_05	24580	57.92	989.773	3	2967.31	1312.46	22020000	HexNAc2Hex2NeuAc2
LEGLLESPSPGTSWTTR	180417_05	24753	58.27	1145.51	3	3434.51	1603.59	-1	<not-identified>
LEGLLESPSPGTSWTTR	180417_05	24792	58.35	1145.5	3	3434.47	1603.55	22030000	HexNAc2Hex2NeuAc3
NKYPDAVATWLNPDPSQK	180417_05	25014	58.8	912.897	4	3648.57	1604.55	-1	<not-identified>
NKYPDAVATWLNPDPSQK	180417_05	25029	58.83	912.648	4	3647.57	1603.56	22030000	HexNAc2Hex2NeuAc3
NKYPDAVATWLNPDPSQK	180417_05	25135	59.05	1216.53	3	3647.57	1603.56	22030000	HexNAc2Hex2NeuAc3
NKYPDAVATWLNPDPSQK	180417_05	25301	59.38	912.646	4	3647.56	1603.55	22030000	HexNAc2Hex2NeuAc3
NKYPDAVATWLNPDPSQK	180417_05	25322	59.43	986.383	3	2957.13	913.12	-1	<not-identified>
NKYPDAVATWLNPDPSQK	180417_05	25368	59.52	912.898	4	3648.57	1604.56	-1	<not-identified>
NKYPDAVATWLNPDPSQK	180417_05	25394	59.58	1216.54	3	3647.59	1603.58	-1	<not-identified>
VAADAVPGSEAPGPRPEADTTR	180417_05	26129	61.17	1025.94	4	4100.72	1936.66	-1	<not-identified>
VAADAVPGSEAPGPRPEADTTR	180417_05	26215	61.35	1025.68	4	4099.72	1935.65	-1	<not-identified>
VAADAVPGSEAPGPRPEADTTR	180417_05	26279	61.48	1367.58	3	4100.72	1936.66	-1	<not-identified>
VSWSGEPVGSISWSIR	180417_05	26578	62.12	988.106	3	2962.3	1215.42	-1	<not-identified>
VSWSGEPVGSISWSIR	180417_05	26828	62.65	988.106	3	2962.3	1215.42	-1	<not-identified>
NILSTSLPDAAWIPPTREVPR	180417_05	28300	65.95	1076.24	4	4301.94	1968.68	33030000	HexNAc3Hex3NeuAc3
NILSTSLPDAAWIPPTREVPR	180417_05	28305	65.97	1076.49	4	4302.93	1969.66	-1	<not-identified>
VWGQGQSPRPE	180417_05	28308	65.98	1319.19	3	3955.56	2714.96	-1	<not-identified>
VWGQGQSPRPE	180417_05	28458	66.32	1211.49	3	3632.45	2391.84	54120000	HexNAc5Hex4FucNeuAc2
VWGQGQSPRPE	180417_05	28526	66.47	1211.16	3	3631.47	2390.86	-1	<not-identified>
WTHSYL	180417_05	29223	67.95	1004.39	3	3011.17	2204.79	-1	<not-identified>
KIEETTMTTQTPAPIQAPSAILPLPGQSVER	180417_05	29281	68.08	1245.84	4	4980.36	1675.61	-1	<not-identified>
KIEETTMTTQTPAPIQAPSAILPLPGQSVER	180417_05	29568	68.72	1246.1	4	4981.38	1676.63	-1	<not-identified>
IILPSISPFGPNKTESPGDFAPVR	180417_05	30294	70.27	1036.49	4	4142.92	1603.57	22030000	HexNAc2Hex2NeuAc3
IILPSISPFGPNKTESPGDFAPVR	180417_05	30314	70.32	1109.26	4	4434.01	1894.65	22040000	HexNAc2Hex2NeuAc4
IILPSISPFGPNKTESPGDFAPVR	180417_05	30346	70.38	1036.74	4	4143.92	1604.57	-1	<not-identified>
IGEIKEETTVSPPHTSMAPAQDEER	180417_05	30560	70.85	1548.65	3	4643.95	1891.64	-1	<not-identified>
KIEETTMTTQTPAPIQAPSAILPLPGQSVER	180417_05	31131	72.13	1227.34	4	4906.34	1601.59	-1	<not-identified>
KIEETTMTTQTPAPIQAPSAILPLPGQSVER	180417_05	31380	72.72	1227.34	4	4906.33	1601.58	-1	<not-identified>
KIEETTMTTQTPAPIQAPSAILPLPGQSVER	180417_05	31437	72.85	1227.59	4	4907.35	1602.61	-1	<not-identified>
SVAQATSSSGEAPDSITWKPY	180417_05	32332	75	1039.91	4	4156.62	1974.59	-1	<not-identified>
SVAQATSSSGEAPDSITWKPY	180417_05	32350	75.03	1039.41	4	4154.63	1972.6	-1	<not-identified>
SVAQATSSSGEAPDSITWKPY	180417_05	32360	75.07	1385.55	3	4154.62	1972.59	-1	<not-identified>
SVAQATSSSGEAPDSITWKPY	180417_05	32366	75.08	1039.66	4	4155.62	1973.59	-1	<not-identified>
SVAQATSSSGEAPDSITWKPY	180417_05	32409	75.17	1391.55	3	4172.62	1990.59	-1	<not-identified>
LIILPSISPFGPNKTESPGDFAPVR	180417_05	32459	75.32	1065.01	4	4257.03	1604.59	-1	<not-identified>
LIILPSISPFGPNKTESPGDFAPVR	180417_05	32468	75.33	1419.68	3	4257.03	1604.59	-1	<not-identified>
LIILPSISPFGPNKTESPGDFAPVR	180417_05	32476	75.37	1419.66	3	4256.98	1604.54	-1	<not-identified>
LIILPSISPFGPNKTESPGDFAPVR	180417_05	32480	75.37	1419.33	3	4255.97	1603.53	-1	<not-identified>
SVAQATSSSGEAPDSITWKPY	180417_05	32487	75.38	1391.22	3	4171.64	1989.61	-1	<not-identified>
LIILPSISPFGPNKTESPGDFAPVR	180417_05	32499	75.42	1137.53	4	4547.11	1894.67	-1	<not-identified>
LIILPSISPFGPNKTESPGDFAPVR	180417_05	32507	75.43	1064.76	4	4256.02	1603.58	-1	<not-identified>
LIILPSISPFGPNKTESPGDFAPVR	180417_05	32528	75.48	1065.26	4	4258.01	1605.57	-1	<not-identified>
SVAQATSSSGEAPDSITWKPY	180417_05	32564	75.57	1385.54	3	4154.61	1972.58	-1	<not-identified>
LIILPSISPFGPNKTESPGDFAPVR	180417_05	32572	75.58	1419.34	3	4256.02	1603.58	-1	<not-identified>
SVAQATSSSGEAPDSITWKPY	180417_05	32579	75.6	1039.41	4	4154.62	1972.59	-1	<not-identified>
LIILPSISPFGPNKTESPGDFAPVR	180417_05	32611	75.68	1517.04	3	4549.09	1896.65	-1	<not-identified>
SVAQATSSSGEAPDSITWKPY	180417_05	32616	75.68	1391.55	3	4172.63	1990.6	-1	<not-identified>
LIILPSISPFGPNKTESPGDFAPVR	180417_05	32630	75.72	1065	4	4256.99	1604.55	-1	<not-identified>
LIILPSISPFGPNKTESPGDFAPVR	180417_05	32714	75.92	1137.53	4	4547.1	1894.66	22040000	HexNAc2Hex2NeuAc4
SVAQATSSSGEAPDSITWKPY	180417_05	32788	76.1	1039.41	4	4154.61	1972.58	-1	<not-identified>
SVAQATSSSGEAPDSITWKPY	180417_05	32827	76.2	1391.54	3	4172.61	1990.58	-1	<not-identified>
SVAQATSSSGEAPDSITWKPY	180417_05	32979	76.58	1385.54	3	4154.61	1972.58	-1	<not-identified>
SLTVSLGPVSKTEGFPK	180417_05	33970	79.28	1530.65	3	4589.95	2842.98	-1	<not-identified>
SLTVSLGPVSKTEGFPK	180417_05	34075	79.58	1152.5	4	4606.97	2860.01	-1	<not-identified>
SLTVSLGPVSKTEGFPK	180417_05	34243	80.05	1147.99	4	4588.95	2841.99	33060000	HexNAc3Hex3NeuAc6
SLTVSLGPVSKTEGFPK	180417_05	35044	82.32	1530.33	3	4588.96	2842	-1	<not-identified>
SLTVSLGPVSKTEGFPK	180417_05	35109	82.53	1536	3	4605.99	2859.03	-1	<not-identified>
VATTVISK	180417_06	5716	21.97	1065.43	2	2129.85	1311.35	-1	<not-identified>
VATTVISK	180417_06	5722	21.98	1065.98	2	2130.96	1312.46	22020000	HexNAc2Hex2NeuAc2
VATTVISK	180417_06	5760	22.1	839.406	2	1677.81	859.307	21010000	HexNAc2HexNeuAc
VATTVISK	180417_06	5768	22.12	920.434	2	1839.86	1021.36	22010000	HexNAc2Hex2NeuAc
VATTVISK	180417_06	5894	22.52	1065.98	2	2130.96	1312.46	22020000	HexNAc2Hex2NeuAc2
ATAPTAQAPR	180417_06	6125	23.25	1148.5	2	2295.99	1312.47	22020000	HexNAc2Hex2NeuAc2
ATAPTAQAPR	180417_06	6134	23.27	984.387	2	1967.77	984.239	-1	<not-identified>
SDSTVQSGGSHTALGDR	180417_06	6134	23.27	984.387	2	1967.77	292.998	-1	<not-identified>
ATAPTAQAPR	180417_06	6137	23.28	921.384	2	1841.76	858.233	-1	<not-identified>
ATAPTAQAPR	180417_06	6160	23.35	821.347	2	1641.69	658.16	-1	<not-identified>
SDSTVQSGGSHTALGDR	180417_06	6334	23.85	1039.4	2	2077.78	403.015	-1	<not-identified>
LQATLDHTGHTSSK	180417_06	6795	25.18	702.806	2	1404.6	-91.1459	-1	<not-identified>
VATTVISK	180417_06	6948	25.67	1139.45	2	2277.89	1459.39	-1	<not-identified>
LQATLDHTGHTSSK	180417_06	6970	25.73	848.607	2	1696.21	200.457	-1	<not-identified>
VATTVISK	180417_06	7027	25.9	839.405	2	1677.8	859.305	21010000	HexNAc2HexNeuAc
VATTVISK	180417_06	7235	26.48	737.868	2	1474.73	656.231	11010000	HexNAcHexNeuAc
VATTVISK	180417_06	7239	26.5	1065.98	2	2130.96	1312.46	22020000	HexNAc2Hex2NeuAc2
VATTVISK	180417_06	7290	26.63	920.432	2	1839.86	1021.36	22010000	HexNAc2Hex2NeuAc
VATTVISK	180417_06	7328	26.75	839.407	2	1677.81	859.309	21010000	HexNAc2HexNeuAc
VATTVISK	180417_06	7416	27	737.867	2	1474.73	656.229	11010000	HexNAcHexNeuAc
VATTVISK	180417_06	7421	27.02	1065.98	2	2130.95	1312.46	22020000	HexNAc2Hex2NeuAc2
VATTVISK	180417_06	7490	27.23	1066.42	2	2131.84	1313.34	-1	<not-identified>
VATTVISK	180417_06	7588	27.52	737.868	2	1474.73	656.23	11010000	HexNAcHexNeuAc
AVAVTLQSH	180417_06	7852	28.25	1148.51	2	2296	1370.49	32110000	HexNAc3Hex2FucNeuAc
AVAVTLQSH	180417_06	7888	28.35	1149.01	2	2297.01	1371.5	-1	<not-identified>
SQIANSGSAGLINPAATVNDESGR	180417_06	7922	28.43	1056.7	2	2112.39	-216.749	-1	<not-identified>
VATTVISK	180417_06	7953	28.53	883.417	2	1765.83	947.329	11020000	HexNAcHexNeuAc2
VATTVISK	180417_06	8012	28.7	884.845	2	1768.68	950.184	-1	<not-identified>
VATTVISK	180417_06	8020	28.72	737.867	2	1474.73	656.229	11010000	HexNAcHexNeuAc
AVAVTLQSH	180417_06	8358	29.72	815.787	2	1630.57	705.058	-1	<not-identified>
AVAVTLQSH	180417_06	8391	29.82	892.889	2	1784.77	859.261	-1	<not-identified>
AVAVTLQSH	180417_06	8424	29.92	1448.12	2	2895.24	1969.73	-1	<not-identified>
REDQTSPAPGLR	180417_06	8434	29.95	846.409	2	1691.81	365.135	11000000	HexNAcHex
AVAVTLQSH	180417_06	8439	29.97	1448.11	2	2895.21	1969.7	33220000	HexNAc3Hex3Fuc2NeuAc2
AVAVTLQSH	180417_06	8499	30.18	1449.11	2	2897.21	1971.7	-1	<not-identified>
AVAVTLQSH	180417_06	8626	30.57	1192.52	2	2384.04	1458.53	22120000	HexNAc2Hex2FucNeuAc2
REDQTSPAPGLR	180417_06	8687	30.75	765.382	2	1529.76	203.081	10000000	HexNAc
AVAVTLQSH	180417_06	8695	30.78	1302.06	2	2603.1	1677.59	33020000	HexNAc3Hex3NeuAc2
AVAVTLQSH	180417_06	8757	30.98	1075.48	2	2149.96	1224.45	32010000	HexNAc3Hex2NeuAc
LETPAPQVPAR	180417_06	8772	31.03	1063.5	2	2125.98	947.331	11020000	HexNAcHexNeuAc2
AVAVTLQSH	180417_06	8788	31.08	1192.52	2	2384.03	1458.52	22120000	HexNAc2Hex2FucNeuAc2
AVAVTLQSH	180417_06	8793	31.08	994.453	2	1987.9	1062.39	31010000	HexNAc3HexNeuAc
AVAVTLQSH	180417_06	8807	31.13	1213.53	2	2426.04	1500.53	22121000	HexNAc2Hex2FucNeuAcNeuAcAc
AVAVTLQSH	180417_06	8816	31.15	892.914	2	1784.82	859.311	21010000	HexNAc2HexNeuAc
RLETPAPQVPAR	180417_06	8844	31.23	761.831	2	1522.65	187.9	-1	<not-identified>
REDQTSPAPGLR	180417_06	8863	31.28	765.384	2	1529.76	203.085	-1	<not-identified>
RLETPAPQVPAR	180417_06	8892	31.37	761.368	2	1521.73	186.974	-1	<not-identified>
AVAVTLQSH	180417_06	8899	31.38	1119.49	2	2237.97	1312.46	22020000	HexNAc2Hex2NeuAc2
AVAVTLQSH	180417_06	9012	31.73	1213.05	2	2425.1	1499.59	-1	<not-identified>
AVAVTLQSH	180417_06	9060	31.87	1140.49	2	2279.97	1354.46	22021000	HexNAc2Hex2NeuAcNeuAcAc
AVAVTLQSH	180417_06	9068	31.88	1119.49	2	2237.97	1312.46	22020000	HexNAc2Hex2NeuAc2
AVAVTLQSH	180417_06	9097	31.98	1213.52	2	2426.04	1500.53	22121000	HexNAc2Hex2FucNeuAcNeuAcAc
AVAVTLQSH	180417_06	9149	32.13	936.923	2	1872.84	947.328	11020000	HexNAcHexNeuAc2
HLC(Carbamidomethyl)HTPEPTC(Carbamidomethyl)PPHEFK	180417_06	9155	32.15	898.867	2	1796.73	-190.168	-1	<not-identified>
AVAVTLQSH	180417_06	9220	32.33	791.373	2	1581.74	656.228	11010000	HexNAcHexNeuAc
AVAVTLQSH	180417_06	9244	32.4	1140.5	2	2279.99	1354.47	22021000	HexNAc2Hex2NeuAcNeuAcAc
AVAVTLQSH	180417_06	9253	32.42	1030.99	2	2060.97	1135.46	-1	<not-identified>
AVAVTLQSH	180417_06	9259	32.43	947.908	2	1894.81	969.298	11020010	HexNAcHexNeuAc2Na
AVAVTLQSH	180417_06	9272	32.48	710.34	2	1419.67	494.163	-1	<not-identified>
AVAVTLQSH	180417_06	9285	32.52	1030.49	2	2059.97	1134.46	-1	<not-identified>
AVAVTLQSH	180417_06	9288	32.52	1213.52	2	2426.04	1500.53	22121000	HexNAc2Hex2FucNeuAcNeuAcAc
AVAVTLQSH	180417_06	9335	32.65	936.921	2	1872.84	947.325	11020000	HexNAcHexNeuAc2
AVAVTLQSH	180417_06	9477	33.03	1082.46	2	2163.92	1238.41	11030000	HexNAcHexNeuAc3
AVAVTLQSH	180417_06	9530	33.18	936.921	2	1872.84	947.325	11020000	HexNAcHexNeuAc2
VWGQGQSPRPE	180417_06	9544	33.22	1094.46	2	2187.92	947.315	11020000	HexNAcHexNeuAc2
AVAVTLQSH	180417_06	9589	33.35	1140.49	2	2279.98	1354.47	22021000	HexNAc2Hex2NeuAcNeuAcAc
AVAVTLQSH	180417_06	9716	33.7	913.918	2	1826.83	901.318	21011000	HexNAc2HexNeuAcAc
AVAVTLQSH	180417_06	9749	33.8	1431.57	2	2862.14	1936.63	-1	<not-identified>
AVAVTLQSH	180417_06	9784	33.9	1140.5	2	2279.98	1354.47	22021000	HexNAc2Hex2NeuAcNeuAcAc
AVAVTLQSH	180417_06	9794	33.92	914.404	2	1827.8	902.291	-1	<not-identified>
AVAVTLQSH	180417_06	9958	34.38	1234.53	2	2468.06	1542.55	22122000	HexNAc2Hex2FucNeuAcAc2
AVAVTLQSH	180417_06	10044	34.63	1067.43	2	2133.84	1208.33	-1	<not-identified>
AVAVTLQSH	180417_06	10256	35.23	811.888	2	1622.77	697.258	20010000	HexNAc2NeuAc
AVAVTLQSH	180417_06	10364	35.55	1161.51	2	2322.01	1396.5	-1	<not-identified>
EGLLKPQTPSYNHHTR	180417_06	10364	35.55	1161.51	2	2322.01	444.046	-1	<not-identified>
AVAVTLQSH	180417_06	10885	37	1124.48	2	2247.96	1322.45	11032000	HexNAcHexNeuAcNeuAcAc2
EGLLKPQTPSYNHHTR	180417_06	11013	37.35	944.162	2	1887.32	9.35398	-1	<not-identified>
EGLLKPQTPSYNHHTR	180417_06	11042	37.42	944.408	2	1887.81	9.84764	-1	<not-identified>
AVAVTLQSH	180417_06	11122	37.63	1124.47	2	2247.94	1322.43	11032000	HexNAcHexNeuAcNeuAcAc2
AVAVTLQSH	180417_06	11317	38.15	1469.6	2	2938.2	2012.69	-1	<not-identified>
LESPSPGTSWTTR	180417_06	11430	38.47	1511.62	2	3022.23	1603.53	22030000	HexNAc2Hex2NeuAc3
LESPSPGTSWTTR	180417_06	11509	38.67	1512.64	2	3024.28	1605.58	-1	<not-identified>
AVAVTLQSH	180417_06	11534	38.73	1234.53	2	2468.05	1542.54	22122000	HexNAc2Hex2FucNeuAcAc2
AVAVTLQSH	180417_06	11562	38.8	1213.52	2	2426.03	1500.52	22121000	HexNAc2Hex2FucNeuAcNeuAcAc
AVAVTLQSH	180417_06	11602	38.92	1235.54	2	2470.07	1544.56	-1	<not-identified>
LESPSPGTSWTTR	180417_06	11676	39.13	1366.08	2	2731.15	1312.46	22020000	HexNAc2Hex2NeuAc2
LESPSPGTSWTTR	180417_06	11698	39.18	1366.08	2	2731.15	1312.46	22020000	HexNAc2Hex2NeuAc2
AVAVTLQSH	180417_06	11750	39.32	1213.52	2	2426.04	1500.53	22121000	HexNAc2Hex2FucNeuAcNeuAcAc
LEGLLKPQTPSYNHHTR	180417_06	11768	39.37	972.429	2	1943.85	-47.1959	-1	<not-identified>
AVAVTLQSH	180417_06	11809	39.48	1213.53	2	2426.04	1500.53	22121000	HexNAc2Hex2FucNeuAcNeuAcAc
AVAVTLQSH	180417_06	11813	39.5	1161.48	2	2321.96	1396.45	-1	<not-identified>
AVAVTLQSH	180417_06	11835	39.55	1163	2	2325	1399.49	-1	<not-identified>
AVAVTLQSH	180417_06	11838	39.57	1140.49	2	2279.97	1354.46	22021000	HexNAc2Hex2NeuAcNeuAcAc
AVAVTLQSH	180417_06	11903	39.75	994.947	2	1988.89	1063.38	22011000	HexNAc2Hex2NeuAcAc
AVAVTLQSH	180417_06	11926	39.8	1234.53	2	2468.05	1542.54	22122000	HexNAc2Hex2FucNeuAcAc2
AVAVTLQSH	180417_06	12024	40.08	1140.5	2	2279.99	1354.48	22021000	HexNAc2Hex2NeuAcNeuAcAc
AVAVTLQSH	180417_06	12025	40.08	1161.5	2	2321.99	1396.48	22022000	HexNAc2Hex2NeuAcAc2
AVAVTLQSH	180417_06	12112	40.32	1234.53	2	2468.06	1542.55	22122000	HexNAc2Hex2FucNeuAcAc2
AVAVTLQSH	180417_06	12124	40.35	957.928	2	1914.85	989.338	11021000	HexNAcHexNeuAcNeuAcAc
AVAVTLQSH	180417_06	12223	40.62	823.37	2	1645.73	720.224	11011010	HexNAcHexNeuAcAcNa
AVAVTLQSH	180417_06	12280	40.78	1161.49	2	2321.98	1396.47	22022000	HexNAc2Hex2NeuAcAc2
AVAVTLQSH	180417_06	12310	40.87	957.926	2	1914.84	989.334	11021000	HexNAcHexNeuAcNeuAcAc
AVAVTLQSH	180417_06	12327	40.92	1161.51	2	2322	1396.49	-1	<not-identified>
AVAVTLQSH	180417_06	12360	41	994.945	2	1988.88	1063.37	22011000	HexNAc2Hex2NeuAcAc
AVAVTLQSH	180417_06	12375	41.05	812.367	2	1623.73	698.216	-1	<not-identified>
AVAVTLQSH	180417_06	12417	41.17	913.917	2	1826.83	901.317	21011000	HexNAc2HexNeuAcAc
AVAVTLQSH	180417_06	12499	41.42	1161.5	2	2321.99	1396.48	22022000	HexNAc2Hex2NeuAcAc2
AHEVSEISVRTVYPPEEETGER	180417_06	12556	41.58	1103.47	2	2205.94	-308.269	-1	<not-identified>
SVSHSAQPPAHQPPMISTK	180417_06	12564	41.6	901.638	2	1802.27	-197.732	-1	<not-identified>
AVAVTLQSH	180417_06	12568	41.62	1115.48	2	2229.96	1304.45	-1	<not-identified>
AVAVTLQSH	180417_06	12589	41.67	1182.47	2	2363.93	1438.42	-1	<not-identified>
AVAVTLQSH	180417_06	12598	41.68	1161.51	2	2322.01	1396.5	-1	<not-identified>
AVAVTLQSH	180417_06	12604	41.7	1115.47	2	2229.93	1304.42	-1	<not-identified>
AVAVTLQSH	180417_06	12637	41.8	1182.5	2	2363.99	1438.48	-1	<not-identified>
AVAVTLQSH	180417_06	12715	42.02	1162.51	2	2324.01	1398.5	-1	<not-identified>
WTHSYL	180417_06	12746	42.1	1059.92	2	2118.84	1312.46	22020000	HexNAc2Hex2NeuAc2
WTHSYL	180417_06	12756	42.12	1059.92	2	2118.84	1312.46	22020000	HexNAc2Hex2NeuAc2
SQGNINNPTPGPVPVPGPK	180417_06	12782	42.2	1158.45	2	2315.89	445.906	-1	<not-identified>
SQGNINNPTPGPVPVPGPK	180417_06	12803	42.25	1157.49	2	2313.97	443.984	-1	<not-identified>
WTHSYL	180417_06	12839	42.35	706.879	2	1412.75	606.367	-1	<not-identified>
AVAVTLQSH	180417_06	12859	42.4	1124.48	2	2247.95	1322.44	11032000	HexNAcHexNeuAcNeuAcAc2
AVAVTLQSH	180417_06	12900	42.52	957.924	2	1914.84	989.331	11021000	HexNAcHexNeuAcNeuAcAc
AVAVTLQSH	180417_06	12926	42.58	812.38	2	1623.75	698.243	11011000	HexNAcHexNeuAcAc
AVAVTLQSH	180417_06	12940	42.63	876.9	2	1752.79	827.283	-1	<not-identified>
WTHSYL	180417_06	12982	42.75	752.322	2	1503.64	697.254	20010000	HexNAc2NeuAc
AVAVTLQSH	180417_06	12985	42.75	1450.57	2	2900.14	1974.63	-1	<not-identified>
AVAVTLQSH	180417_06	13043	42.92	1124.48	2	2247.95	1322.44	11032000	HexNAcHexNeuAcNeuAcAc2
AVAVTLQSH	180417_06	13145	43.22	1124.98	2	2248.96	1323.45	-1	<not-identified>
WTHSYL	180417_06	13156	43.25	752.323	2	1503.64	697.255	20010000	HexNAc2NeuAc
GNFLTGLGHR	180417_06	13204	43.38	1107.46	2	2213.91	1142.35	-1	<not-identified>
RDFTAAFPR	180417_06	13282	43.6	797.885	2	1594.76	514.205	-1	<not-identified>
WTHSYL	180417_06	13313	43.68	877.361	2	1753.72	947.332	11020000	HexNAcHexNeuAc2
WTHSYL	180417_06	13342	43.77	752.324	2	1503.64	697.258	20010000	HexNAc2NeuAc
SLTVSLGPVSK	180417_06	13368	43.83	819.331	2	1637.65	550.019	-1	<not-identified>
WTHSYL	180417_06	13388	43.9	606.775	2	1212.54	406.159	20000000	HexNAc2
GNFLTGLGHR	180417_06	13393	43.9	1107.46	2	2213.9	1142.33	-1	<not-identified>
GNFLTGLGHR	180417_06	13400	43.92	1106.96	2	2212.92	1141.35	-1	<not-identified>
WTHSYL	180417_06	13451	44.07	731.808	2	1462.61	656.226	11010000	HexNAcHexNeuAc
WTHSYL	180417_06	13493	44.18	877.358	2	1753.71	947.325	11020000	HexNAcHexNeuAc2
WTHSYL	180417_06	13518	44.25	1024.41	2	2047.8	1241.42	-1	<not-identified>
WTHSYL	180417_06	13534	44.3	607.276	2	1213.55	407.162	-1	<not-identified>
ALSPQQVTRLPSGY	180417_06	13543	44.33	1561.18	2	3121.36	1604.54	-1	<not-identified>
DFTAAFPR	180417_06	13548	44.35	1155.49	2	2309.98	1385.52	-1	<not-identified>
DFTAAFPR	180417_06	13574	44.42	1155.98	2	2310.95	1386.49	33010000	HexNAc3Hex3NeuAc
WTHSYL	180417_06	13575	44.42	606.775	2	1212.54	406.16	20000000	HexNAc2
ALSPQQVTRLPSGY	180417_06	13579	44.42	1560.67	2	3120.33	1603.51	-1	<not-identified>
ALSPQQVTRLPSGY	180417_06	13660	44.63	1561.67	2	3122.33	1605.51	-1	<not-identified>
ALSPQQVTRLPSGY	180417_06	13677	44.68	1414.61	2	2828.22	1311.41	-1	<not-identified>
WTHSYL	180417_06	13691	44.73	877.358	2	1753.71	947.326	11020000	HexNAcHexNeuAc2
DFTAAFPR	180417_06	13781	44.97	1155.98	2	2310.95	1386.49	33010000	HexNAc3Hex3NeuAc
DFTAAFPR	180417_06	13950	45.47	973.414	2	1945.82	1021.36	22010000	HexNAc2Hex2NeuAc
DFTAAFPR	180417_06	13985	45.55	1156.47	2	2311.94	1387.48	-1	<not-identified>
DFTAAFPR	180417_06	13988	45.57	1301.52	2	2602.04	1677.58	33020000	HexNAc3Hex3NeuAc2
WTHSYL	180417_06	14023	45.65	1099.9	2	2198.79	1392.41	22020100	HexNAc2Hex2NeuAc2Sulph
DFTAAFPR	180417_06	14057	45.75	1155.98	2	2310.96	1386.5	33010000	HexNAc3Hex3NeuAc
DFTAAFPR	180417_06	14171	46.07	1301.52	2	2602.04	1677.58	33020000	HexNAc3Hex3NeuAc2
NQVTPLDILSKTR	180417_06	14355	46.6	864.39	2	1727.77	242.93	-1	<not-identified>
WTHSYL	180417_06	14500	46.98	1043.42	2	2085.83	1279.45	-1	<not-identified>
DFTAAFPR	180417_06	14942	48.22	936.39	2	1871.77	947.315	11020000	HexNAcHexNeuAc2
DFTAAFPR	180417_06	15003	48.38	790.356	2	1579.7	655.247	-1	<not-identified>
DFTAAFPR	180417_06	15128	48.73	936.393	2	1871.78	947.32	11020000	HexNAcHexNeuAc2
KAPPPSGASQTIK	180417_06	15210	48.97	865.855	2	1730.7	448.986	-1	<not-identified>
KAPPPSGASQTIK	180417_06	15254	49.1	866.356	2	1731.71	449.989	-1	<not-identified>
KAPPPSGASQTIK	180417_06	15281	49.17	968.977	2	1936.95	655.231	-1	<not-identified>
KAPPPSGASQTIK	180417_06	15387	49.48	969.479	2	1937.95	656.235	-1	<not-identified>
SLTVSLGPVSKTEGFPK	180417_06	15461	49.68	1020.46	2	2039.92	292.955	-1	<not-identified>
SLTVSLGPVSKTEGFPK	180417_06	15618	50.15	1002.94	2	2004.88	257.915	-1	<not-identified>
SLTVSLGPVSKTEGFPK	180417_06	15880	50.9	1002.94	2	2004.88	257.917	-1	<not-identified>
ATAPTAQAPR	180417_06	16215	51.82	1148.49	2	2295.98	1312.45	22020000	HexNAc2Hex2NeuAc2
SLTVSLGPVSKTEGFPK	180417_06	16766	53.35	994.177	2	1987.35	240.383	-1	<not-identified>
VVPDSTPSWANPSPTPVIS	180417_06	20813	65	1100	2	2199	248.019	-1	<not-identified>
LIILPSISPFGPNKTESPGDFAPVR	180417_06	24085	75.43	1065.26	2	2129.5	-522.936	-1	<not-identified>
VATTVISK	180417_07	4595	18.05	905.055	3	2713.15	1894.65	22040000	HexNAc2Hex2NeuAc4
GEGKVATTVISK	180417_07	4605	18.08	1028.78	3	3084.33	1894.65	22040000	HexNAc2Hex2NeuAc4
TVTWPDMELPLPR	180417_07	4605	18.08	1028.78	3	3084.33	1529.53	-1	<not-identified>
VATTVISK	180417_07	4612	18.1	906.015	3	2716.03	1897.53	-1	<not-identified>
VATTVISK	180417_07	4615	18.12	906.015	3	2716.03	1897.53	-1	<not-identified>
GEGKVATTVISK	180417_07	4976	19.28	931.749	3	2793.23	1603.55	22030000	HexNAc2Hex2NeuAc3
VATTVISK	180417_07	5054	19.52	815.35	3	2444.04	1625.54	22030010	HexNAc2Hex2NeuAc3Na
VATTVISK	180417_07	5059	19.53	808.021	3	2422.05	1603.55	22030000	HexNAc2Hex2NeuAc3
VATTVISK	180417_07	5213	19.98	1051.45	3	3152.33	2333.83	44030000	HexNAc4Hex4NeuAc3
VATTVISK	180417_07	5227	20.03	815.35	3	2444.03	1625.54	22030010	HexNAc2Hex2NeuAc3Na
VATTVISK	180417_07	5230	20.03	808.022	3	2422.05	1603.55	22030000	HexNAc2Hex2NeuAc3
GQQGQGPWGTGGTPHGPR	180417_07	5256	20.1	1058.77	3	3174.31	1399.47	-1	<not-identified>
VATTVISK	180417_07	5301	20.22	1210.47	3	3629.39	2810.89	-1	<not-identified>
VATTVISK	180417_07	5468	20.65	929.735	3	2787.19	1968.69	33030000	HexNAc3Hex3NeuAc3
GEGKVATTVISK	180417_07	5566	20.88	834.717	3	2502.14	1312.46	22020000	HexNAc2Hex2NeuAc2
GEGKVATTVISK	180417_07	5571	20.9	842.044	3	2524.12	1334.44	22020010	HexNAc2Hex2NeuAc2Na
VATTVISK	180417_07	5632	21.05	710.989	3	2130.95	1312.46	22020000	HexNAc2Hex2NeuAc2
VATTVISK	180417_07	5643	21.07	718.318	3	2152.94	1334.44	22020010	HexNAc2Hex2NeuAc2Na
VATTVISK	180417_07	5700	21.2	1387.54	3	4160.59	3342.1	-1	<not-identified>
VATTVISK	180417_07	5734	21.3	1225.11	3	3673.3	2854.81	-1	<not-identified>
VATTVISK	180417_07	5765	21.37	1428.3	3	4282.88	3464.38	-1	<not-identified>
VATTVISK	180417_07	5784	21.4	1223.45	3	3668.34	2849.84	-1	<not-identified>
VATTVISK	180417_07	5854	21.57	710.99	3	2130.96	1312.46	22020000	HexNAc2Hex2NeuAc2
VATTVISK	180417_07	5878	21.62	718.317	3	2152.94	1334.44	22020010	HexNAc2Hex2NeuAc2Na
ATAPTAQAPR	180417_07	6010	21.92	766.001	3	2295.99	1312.46	22020000	HexNAc2Hex2NeuAc2
ATAPTAQAPR	180417_07	6030	21.97	773.327	3	2317.97	1334.44	22020010	HexNAc2Hex2NeuAc2Na
VTLSPKDC(Carbamidomethyl)QVFR	180417_07	6164	22.27	823.712	3	2469.12	1019.37	-1	<not-identified>
ATAPTAQAPR	180417_07	6240	22.45	765.999	3	2295.98	1312.46	22020000	HexNAc2Hex2NeuAc2
DNENKKPTAIPK	180417_07	6267	22.5	768.025	3	2302.06	947.326	11020000	HexNAcHexNeuAc2
REDQTSPAPGLR	180417_07	6292	22.57	758.673	3	2274	947.328	11020000	HexNAcHexNeuAc2
DNENKKPTAIPK	180417_07	6315	22.62	775.352	3	2324.04	969.308	11020010	HexNAcHexNeuAc2Na
VTLSPKDC(Carbamidomethyl)QVFR	180417_07	6415	22.83	823.711	3	2469.12	1019.37	-1	<not-identified>
SALQPSPTHSSSNTQR	180417_07	6494	22.98	1101.13	3	3301.38	1603.56	22030000	HexNAc2Hex2NeuAc3
VTLSPKDC(Carbamidomethyl)QVFR	180417_07	6513	23.02	823.71	3	2469.12	1019.36	-1	<not-identified>
DNENKKPTAIPK	180417_07	6535	23.07	768.026	3	2302.06	947.331	11020000	HexNAcHexNeuAc2
SALQPSPTHSSSNTQR	180417_07	6601	23.2	1011.43	3	3032.27	1334.45	22020010	HexNAc2Hex2NeuAc2Na
SALQPSPTHSSSNTQR	180417_07	6606	23.22	1004.1	3	3010.28	1312.46	22020000	HexNAc2Hex2NeuAc2
VATTVISK	180417_07	6830	23.68	767.004	3	2299	1480.5	22120010	HexNAc2Hex2FucNeuAc2Na
SALQPSPTHSSSNTQR	180417_07	6856	23.75	882.389	3	2645.15	947.333	-1	<not-identified>
VATTVISK	180417_07	6856	23.75	882.389	3	2645.15	1826.66	-1	<not-identified>
SALQPSPTHSSSNTQR	180417_07	6867	23.77	889.716	3	2667.13	969.314	11020010	HexNAcHexNeuAc2Na
VATTVISK	180417_07	6868	23.77	759.674	3	2277.01	1458.51	22120000	HexNAc2Hex2FucNeuAc2
VATTVISK	180417_07	7043	24.12	1114.48	3	3341.42	2522.92	-1	<not-identified>
VATTVISK	180417_07	7091	24.22	752.295	3	2254.87	1436.37	22020120	HexNAc2Hex2NeuAc2SulphNa2
VATTVISK	180417_07	7092	24.22	744.971	3	2232.9	1414.4	22020110	HexNAc2Hex2NeuAc2SulphNa
VATTVISK	180417_07	7111	24.25	718.318	3	2152.94	1334.44	22020010	HexNAc2Hex2NeuAc2Na
VATTVISK	180417_07	7129	24.3	1113.4	3	3338.2	2519.7	-1	<not-identified>
VATTVISK	180417_07	7156	24.35	710.99	3	2130.96	1312.46	22020000	HexNAc2Hex2NeuAc2
VATTVISK	180417_07	7163	24.37	1474.51	3	4421.52	3603.02	-1	<not-identified>
VATTVISK	180417_07	7180	24.4	737.644	3	2210.92	1392.42	22020100	HexNAc2Hex2NeuAc2Sulph
SALQPSPTHSSSNTQR	180417_07	7225	24.48	785.354	3	2354.05	656.226	11010000	HexNAcHexNeuAc
VATTVISK	180417_07	7380	24.8	718.317	3	2152.94	1334.44	22020010	HexNAc2Hex2NeuAc2Na
FVGGAENTAHPR	180417_07	7448	24.93	734.985	3	2202.94	947.324	11020000	HexNAcHexNeuAc2
RGPATPGPSYR	180417_07	7464	24.97	702.645	3	2105.92	947.32	11020000	HexNAcHexNeuAc2
VATTVISK	180417_07	7468	24.98	709.974	3	2127.91	1309.41	-1	<not-identified>
SALQPSPTHSSSNTQR	180417_07	7498	25.03	785.356	3	2354.05	656.233	11010000	HexNAcHexNeuAc
RGPATPGPSYR	180417_07	7584	25.2	824.355	3	2471.05	1312.45	22020000	HexNAc2Hex2NeuAc2
VATTVISK	180417_07	7600	25.25	710.99	3	2130.95	1312.46	22020000	HexNAc2Hex2NeuAc2
VATTVISK	180417_07	7690	25.43	839.011	3	2515.02	1696.52	-1	<not-identified>
VATTVISK	180417_07	7771	25.6	839.346	3	2516.02	1697.52	-1	<not-identified>
AVAVTLQSH	180417_07	7774	25.6	948.391	3	2843.16	1917.65	-1	<not-identified>
ESTPPPHVMR	180417_07	7774	25.6	948.391	3	2843.16	1692.59	-1	<not-identified>
REDQTSPAPGLR	180417_07	7787	25.63	661.64	3	1982.91	656.23	11010000	HexNAcHexNeuAc
AVAVTLQSH	180417_07	7842	25.75	948.048	3	2842.13	1916.62	-1	<not-identified>
ESTPPPHVMR	180417_07	7842	25.75	948.048	3	2842.13	1691.56	-1	<not-identified>
LQATLDHTGHTSSK	180417_07	7849	25.77	936.742	3	2808.21	1312.46	22020000	HexNAc2Hex2NeuAc2
RGPATPGPSYR	180417_07	7853	25.77	824.356	3	2471.05	1312.45	22020000	HexNAc2Hex2NeuAc2
REDQTSPAPGLR	180417_07	7870	25.82	668.965	3	2004.88	678.205	11010010	HexNAcHexNeuAcNa
VATTVISK	180417_07	7957	25.98	1473.59	3	4418.75	3600.25	-1	<not-identified>
VAADAVPGSEAPGPRPE	180417_07	7971	26	1050.44	3	3149.32	1529.51	-1	<not-identified>
VATTVISK	180417_07	8028	26.12	1514.59	3	4541.75	3723.25	-1	<not-identified>
VATTVISK	180417_07	8038	26.13	1511.58	3	4532.73	3714.23	-1	<not-identified>
VATTVISK	180417_07	8056	26.17	1465.56	3	4394.66	3576.16	-1	<not-identified>
VATTVISK	180417_07	8072	26.2	1346.19	3	4036.54	3218.05	-1	<not-identified>
VAADAVPGSEAPGPRPE	180417_07	8244	26.55	1050.09	3	3148.25	1528.45	-1	<not-identified>
LQATLDHTGHTSSK	180417_07	8322	26.7	820.975	3	2460.91	965.16	-1	<not-identified>
LQATLDHTGHTSSK	180417_07	8392	26.85	822.354	3	2465.05	969.297	11020010	HexNAcHexNeuAc2Na
LQATLDHTGHTSSK	180417_07	8405	26.87	815.03	3	2443.07	947.324	11020000	HexNAcHexNeuAc2
VATTVISK	180417_07	8452	26.97	882.32	3	2644.95	1826.45	-1	<not-identified>
VATTVISK	180417_07	8737	27.52	1066.38	4	4262.49	3443.99	-1	<not-identified>
VATTVISK	180417_07	8804	27.65	882.321	3	2644.95	1826.45	-1	<not-identified>
VATTVISK	180417_07	8932	27.9	882.652	3	2645.94	1827.44	-1	<not-identified>
LQATLDHTGHTSSK	180417_07	8974	27.98	937.077	3	2809.22	1313.47	22210000	HexNAc2Hex2Fuc2NeuAc
LQATLDHTGHTSSK	180417_07	9096	28.22	937.072	3	2809.2	1313.45	-1	<not-identified>
VATTVISK	180417_07	9141	28.3	1066.75	3	3198.24	2379.75	-1	<not-identified>
VATTVISK	180417_07	9361	28.7	1066.09	3	3196.26	2377.76	-1	<not-identified>
LETPAPQVPAR	180417_07	9461	28.92	709.331	3	2125.98	947.325	11020000	HexNAcHexNeuAc2
AVAVTLQSH	180417_07	9478	28.95	965.742	3	2895.21	1969.7	33220000	HexNAc3Hex3Fuc2NeuAc2
LETPAPQVPAR	180417_07	9501	28.98	709.665	3	2126.98	948.326	-1	<not-identified>
AVAVTLQSH	180417_07	9507	29	1374.53	3	4121.59	3196.07	-1	<not-identified>
AVAVTLQSH	180417_07	9517	29.02	821.678	3	2463.02	1537.51	-1	<not-identified>
AVAVTLQSH	180417_07	9532	29.05	1449.23	3	4345.67	3420.16	-1	<not-identified>
AVAVTLQSH	180417_07	9544	29.07	917.054	3	2749.15	1823.64	33120000	HexNAc3Hex3FucNeuAc2
AVAVTLQSH	180417_07	9563	29.1	973.071	3	2917.2	1991.69	33220010	HexNAc3Hex3Fuc2NeuAc2Na
AVAVTLQSH	180417_07	9607	29.18	1374.18	3	4120.52	3195.01	-1	<not-identified>
AVAVTLQSH	180417_07	9608	29.18	1447.58	3	4340.72	3415.21	-1	<not-identified>
VATTVISK	180417_07	9655	29.28	1066.42	3	3197.25	2378.75	-1	<not-identified>
AVAVTLQSH	180417_07	9673	29.32	827.343	3	2480.02	1554.51	-1	<not-identified>
VWGQGQSPRPE	180417_07	9673	29.32	827.343	3	2480.02	1239.41	-1	<not-identified>
AVAVTLQSH	180417_07	9722	29.4	966.076	3	2896.21	1970.7	-1	<not-identified>
AVAVTLQSH	180417_07	9726	29.42	802.671	3	2406	1480.49	22120010	HexNAc2Hex2FucNeuAc2Na
AVAVTLQSH	180417_07	9746	29.45	822.34	3	2465.01	1539.5	-1	<not-identified>
AVAVTLQSH	180417_07	9761	29.48	795.346	3	2384.02	1458.51	22120000	HexNAc2Hex2FucNeuAc2
AVAVTLQSH	180417_07	9863	29.68	746.661	3	2237.97	1312.46	22020000	HexNAc2Hex2NeuAc2
VATTVISK	180417_07	9882	29.72	1066.09	3	3196.27	2377.77	-1	<not-identified>
AVAVTLQSH	180417_07	9962	29.87	780.642	3	2339.91	1414.4	22020110	HexNAc2Hex2NeuAc2SulphNa
AVAVTLQSH	180417_07	10015	29.97	802.674	3	2406.01	1480.5	22120010	HexNAc2Hex2FucNeuAc2Na
ESTPPPHVMR	180417_07	10015	29.97	802.674	3	2406.01	1255.44	-1	<not-identified>
AVAVTLQSH	180417_07	10018	29.97	773.315	3	2317.93	1392.42	22020100	HexNAc2Hex2NeuAc2Sulph
AVAVTLQSH	180417_07	10049	30.03	814.691	3	2442.06	1516.55	-1	<not-identified>
AVAVTLQSH	180417_07	10054	30.05	795.347	3	2384.03	1458.52	22120000	HexNAc2Hex2FucNeuAc2
AVAVTLQSH	180417_07	10058	30.05	1161.46	3	3482.36	2556.85	-1	<not-identified>
AVAVTLQSH	180417_07	10072	30.07	974.045	3	2920.12	1994.61	-1	<not-identified>
AVAVTLQSH	180417_07	10087	30.13	967.048	3	2899.13	1973.62	-1	<not-identified>
VATTVISK	180417_07	10115	30.18	1066.48	3	3197.42	2378.92	-1	<not-identified>
AVAVTLQSH	180417_07	10125	30.2	1046.74	3	3138.19	2212.68	-1	<not-identified>
AVAVTLQSH	180417_07	10131	30.22	753.989	3	2259.95	1334.44	22020010	HexNAc2Hex2NeuAc2Na
ESTPPPHVMR	180417_07	10131	30.22	753.989	3	2259.95	1109.39	-1	<not-identified>
AVAVTLQSH	180417_07	10157	30.25	746.66	3	2237.97	1312.46	22020000	HexNAc2Hex2NeuAc2
VATTVISK	180417_07	10233	30.4	1065.46	3	3194.35	2375.85	-1	<not-identified>
AVAVTLQSH	180417_07	10252	30.43	780.64	3	2339.91	1414.4	22020110	HexNAc2Hex2NeuAc2SulphNa
AVAVTLQSH	180417_07	10273	30.47	729.334	3	2185.99	1260.48	-1	<not-identified>
AVAVTLQSH	180417_07	10311	30.55	1500.3	3	4498.9	3573.39	-1	<not-identified>
VATTVISK	180417_07	10313	30.55	1067.13	3	3199.38	2380.88	-1	<not-identified>
AVAVTLQSH	180417_07	10322	30.57	1221.17	3	3661.49	2735.98	-1	<not-identified>
AVAVTLQSH	180417_07	10349	30.62	1499.63	3	4496.88	3571.37	-1	<not-identified>
AVAVTLQSH	180417_07	10355	30.63	729.309	3	2185.91	1260.4	-1	<not-identified>
AVAVTLQSH	180417_07	10407	30.73	753.988	3	2259.95	1334.44	22020010	HexNAc2Hex2NeuAc2Na
ESTPPPHVMR	180417_07	10407	30.73	753.988	3	2259.95	1109.38	-1	<not-identified>
AVAVTLQSH	180417_07	10446	30.8	937.401	3	2810.19	1884.68	-1	<not-identified>
AVAVTLQSH	180417_07	10451	30.82	746.661	3	2237.97	1312.46	22020000	HexNAc2Hex2NeuAc2
AVAVTLQSH	180417_07	10507	30.93	795.348	3	2384.03	1458.52	22120000	HexNAc2Hex2FucNeuAc2
AVAVTLQSH	180417_07	10553	31.02	1358.51	3	4073.53	3148.02	-1	<not-identified>
AVAVTLQSH	180417_07	10573	31.05	624.949	3	1872.83	947.323	11020000	HexNAcHexNeuAc2
AVAVTLQSH	180417_07	10579	31.07	913.712	3	2739.12	1813.61	-1	<not-identified>
AVAVTLQSH	180417_07	10602	31.12	1404.22	3	4210.64	3285.13	-1	<not-identified>
AVAVTLQSH	180417_07	10607	31.12	1397.53	3	4190.57	3265.06	-1	<not-identified>
AVAVTLQSH	180417_07	10617	31.15	1263.89	3	3789.66	2864.15	-1	<not-identified>
AVAVTLQSH	180417_07	10626	31.17	816.676	3	2448.01	1522.5	22121010	HexNAc2Hex2FucNeuAcNeuAcAcNa
AVAVTLQSH	180417_07	10628	31.17	1392.2	3	4174.58	3249.07	-1	<not-identified>
AVAVTLQSH	180417_07	10632	31.17	893.028	3	2677.07	1751.56	-1	<not-identified>
AVAVTLQSH	180417_07	10657	31.22	1256.21	3	3766.63	2841.12	-1	<not-identified>
AVAVTLQSH	180417_07	10662	31.22	1393.19	3	4177.56	3252.05	-1	<not-identified>
AVAVTLQSH	180417_07	10675	31.25	1385.54	3	4154.61	3229.1	-1	<not-identified>
AVAVTLQSH	180417_07	10679	31.27	1378.19	3	4132.56	3207.05	-1	<not-identified>
AVAVTLQSH	180417_07	10680	31.27	942.379	3	2825.12	1899.61	-1	<not-identified>
AVAVTLQSH	180417_07	10685	31.27	817.014	3	2449.03	1523.52	-1	<not-identified>
AVAVTLQSH	180417_07	10703	31.3	1432.24	3	4294.71	3369.2	-1	<not-identified>
AVAVTLQSH	180417_07	10714	31.33	1402.94	3	4206.8	3281.29	-1	<not-identified>
AVAVTLQSH	180417_07	10717	31.33	1337.19	3	4009.54	3084.03	-1	<not-identified>
AVAVTLQSH	180417_07	10723	31.35	1405.55	3	4214.64	3289.13	-1	<not-identified>
AVAVTLQSH	180417_07	10724	31.35	1420.56	3	4259.66	3334.14	-1	<not-identified>
AVAVTLQSH	180417_07	10730	31.35	1263.55	3	3788.64	2863.13	-1	<not-identified>
AVAVTLQSH	180417_07	10731	31.37	1402.27	3	4204.78	3279.27	-1	<not-identified>
AVAVTLQSH	180417_07	10748	31.4	1214.15	3	3640.43	2714.92	-1	<not-identified>
AVAVTLQSH	180417_07	10753	31.4	1518.28	3	4552.82	3627.31	-1	<not-identified>
AVAVTLQSH	180417_07	10759	31.42	945.456	3	2834.35	1908.84	-1	<not-identified>
AVAVTLQSH	180417_07	10768	31.43	1409.94	3	4227.79	3302.28	-1	<not-identified>
AVAVTLQSH	180417_07	10774	31.43	1417.26	3	4249.75	3324.24	-1	<not-identified>
AVAVTLQSH	180417_07	10783	31.45	1410.27	3	4228.81	3303.3	-1	<not-identified>
AVAVTLQSH	180417_07	10787	31.47	1291.19	3	3871.57	2946.06	-1	<not-identified>
AVAVTLQSH	180417_07	10788	31.47	1391.2	3	4171.59	3246.08	-1	<not-identified>
AVAVTLQSH	180417_07	10793	31.47	914.042	3	2740.11	1814.6	-1	<not-identified>
AVAVTLQSH	180417_07	10797	31.48	1248.51	3	3743.53	2818.02	-1	<not-identified>
AVAVTLQSH	180417_07	10801	31.48	1359.23	3	4075.66	3150.15	-1	<not-identified>
VATTVISK	180417_07	10807	31.5	737.309	3	2209.91	1391.41	-1	<not-identified>
AVAVTLQSH	180417_07	10811	31.5	632.277	3	1894.82	969.306	11020010	HexNAcHexNeuAc2Na
AVAVTLQSH	180417_07	10815	31.52	1419.57	3	4256.68	3331.17	-1	<not-identified>
VWGQGQSPRPE	180417_07	10867	31.6	729.983	3	2187.93	947.327	11020000	HexNAcHexNeuAc2
AVAVTLQSH	180417_07	10878	31.63	624.949	3	1872.83	947.323	11020000	HexNAcHexNeuAc2
AVAVTLQSH	180417_07	10887	31.65	746.662	3	2237.97	1312.46	22020000	HexNAc2Hex2NeuAc2
AVAVTLQSH	180417_07	10903	31.68	1256.55	3	3767.64	2842.13	-1	<not-identified>
AVAVTLQSH	180417_07	10984	31.83	753.986	3	2259.94	1334.43	22020010	HexNAc2Hex2NeuAc2Na
AVAVTLQSH	180417_07	11012	31.88	1221.47	3	3662.4	2736.89	-1	<not-identified>
VWGQGQSPRPE	180417_07	11072	32	1094.75	3	3282.23	2041.62	-1	<not-identified>
AVAVTLQSH	180417_07	11209	32.27	735.986	3	2205.94	1280.43	11031000	HexNAcHexNeuAc2NeuAcAc
AVAVTLQSH	180417_07	11214	32.28	1192.47	3	3575.4	2649.89	-1	<not-identified>
AVAVTLQSH	180417_07	11270	32.38	743.312	3	2227.92	1302.41	11031010	HexNAcHexNeuAc2NeuAcAcNa
AVAVTLQSH	180417_07	11275	32.4	765.297	3	2293.88	1368.37	-1	<not-identified>
AVAVTLQSH	180417_07	11352	32.55	767.991	3	2301.96	1376.45	22021010	HexNAc2Hex2NeuAcNeuAcAcNa
ESTPPPHVMR	180417_07	11352	32.55	767.991	3	2301.96	1151.39	-1	<not-identified>
AVAVTLQSH	180417_07	11368	32.58	760.664	3	2279.98	1354.47	22021000	HexNAc2Hex2NeuAcNeuAcAc
HLC(Carbamidomethyl)HTPEPTC(Carbamidomethyl)PPHEFK	180417_07	11439	32.72	1197.48	3	3590.44	1603.54	22030000	HexNAc2Hex2NeuAc3
AVAVTLQSH	180417_07	11451	32.75	974.394	3	2921.17	1995.66	-1	<not-identified>
AVAVTLQSH	180417_07	11461	32.77	857.695	3	2571.07	1645.56	22031000	HexNAc2Hex2NeuAc2NeuAcAc
DALPDNENKKPTAIPK	180417_07	11579	32.98	900.09	3	2698.26	947.322	11020000	HexNAcHexNeuAc2
AVAVTLQSH	180417_07	11583	32.98	743.313	3	2227.93	1302.42	11031010	HexNAcHexNeuAc2NeuAcAcNa
DALPDNENKKPTAIPK	180417_07	11622	33.07	1349.55	3	4046.63	2295.7	-1	<not-identified>
DGLSLPEDIETVTASQMR	180417_07	11642	33.1	1067.8	3	3201.39	1239.44	-1	<not-identified>
DALPDNENKKPTAIPK	180417_07	11703	33.22	907.419	3	2720.24	969.308	11020010	HexNAcHexNeuAc2Na
AVAVTLQSH	180417_07	11761	33.32	891.676	3	2673.01	1747.5	-1	<not-identified>
VATTVISK	180417_07	11762	33.33	1066.09	3	3196.24	2377.74	-1	<not-identified>
DALPDNENKKPTAIPK	180417_07	11770	33.33	1022.14	3	3064.4	1313.47	22210000	HexNAc2Hex2Fuc2NeuAc
DALPDNENKKPTAIPK	180417_07	11865	33.52	900.091	3	2698.26	947.325	11020000	HexNAcHexNeuAc2
SDALPDNENKKPTAIPK	180417_07	11906	33.58	929.103	3	2785.29	947.328	11020000	HexNAcHexNeuAc2
AVAVTLQSH	180417_07	11956	33.68	1103.47	3	3308.4	2382.89	-1	<not-identified>
ESTPPPHVMR	180417_07	11995	33.75	646.281	3	1936.83	786.262	-1	<not-identified>
DALPDNENKKPTAIPK	180417_07	12006	33.78	907.421	3	2720.25	969.314	11020010	HexNAcHexNeuAc2Na
GLLKPQTPSYNHHTR	180417_07	12012	33.78	953.439	3	2858.3	1109.38	-1	<not-identified>
LQAAGLPHTEVPQGK	180417_07	12012	33.78	953.439	3	2858.3	1312.46	22020000	HexNAc2Hex2NeuAc2
AVAVTLQSH	180417_07	12098	33.95	638.953	3	1914.84	989.334	11021000	HexNAcHexNeuAcNeuAcAc
DALPDNENKKPTAIPK	180417_07	12175	34.08	900.092	3	2698.26	947.328	11020000	HexNAcHexNeuAc2
SDALPDNENKKPTAIPK	180417_07	12210	34.15	929.102	3	2785.29	947.324	11020000	HexNAcHexNeuAc2
HLVTTVPKDPEAAE	180417_07	12265	34.25	940.749	3	2820.23	1313.45	-1	<not-identified>
DALPDNENKKPTAIPK	180417_07	12296	34.3	900.421	3	2699.25	948.316	-1	<not-identified>
AVAVTLQSH	180417_07	12300	34.32	948.415	3	2843.23	1917.72	-1	<not-identified>
HLVTTVPKDPEAAE	180417_07	12321	34.35	940.418	3	2819.24	1312.46	22020000	HexNAc2Hex2NeuAc2
AQGSQVLESTPPPHVMR	180417_07	12410	34.52	1049.47	3	3146.39	1312.46	22020000	HexNAc2Hex2NeuAc2
TPLPPTSAHGNVAEGETKPDPDVTER	180417_07	12547	34.77	1343.27	3	4027.8	1312.48	-1	<not-identified>
DALPDNENKKPTAIPK	180417_07	12561	34.78	900.757	3	2700.26	949.324	-1	<not-identified>
HLVTTVPKDPEAAE	180417_07	12638	34.95	940.42	3	2819.25	1312.47	22020000	HexNAc2Hex2NeuAc2
VAADAVPGSEAPGPRPEADTTR	180417_07	12638	34.95	940.42	3	2819.25	655.182	-1	<not-identified>
DALPDNENKKPTAIPK	180417_07	12675	35.02	1011.06	3	3031.16	1280.23	-1	<not-identified>
AQGSQVLESTPPPHVMR	180417_07	12688	35.03	1049.81	3	3147.42	1313.49	-1	<not-identified>
LQAAGLPHTEVPQGK	180417_07	12732	35.12	831.728	3	2493.17	947.33	11020000	HexNAcHexNeuAc2
HLVTTVPKDPEAAE	180417_07	12741	35.13	818.705	3	2454.1	947.319	11020000	HexNAcHexNeuAc2
TPLPPTSAHGNVAEGETKPDPDVTER	180417_07	12759	35.18	1342.18	3	4024.53	1309.21	-1	<not-identified>
AVAVTLQSH	180417_07	12910	35.47	1251.48	3	3752.44	2826.93	-1	<not-identified>
HLVTTVPKDPEAAE	180417_07	13161	35.92	1227.49	3	3680.47	2173.69	-1	<not-identified>
AVAVTLQSH	180417_07	13250	36.08	957.136	4	3825.52	2900.01	-1	<not-identified>
AVAVTLQSH	180417_07	13365	36.3	936.698	3	2808.08	1882.57	-1	<not-identified>
GQQGQGPWGTGGTPHGPR	180417_07	13390	36.33	908.727	3	2724.17	949.33	-1	<not-identified>
GQQGQGPWGTGGTPHGPR	180417_07	13428	36.42	908.059	3	2722.16	947.327	11020000	HexNAcHexNeuAc2
AVAVTLQSH	180417_07	13433	36.42	957.388	4	3826.53	2901.02	-1	<not-identified>
GPLPVQPTADTTTHVTPR	180417_07	13495	36.53	1164.14	3	3490.4	1602.4	-1	<not-identified>
GPLPVQPTADTTTHVTPR	180417_07	13568	36.67	1164.85	3	3492.54	1604.55	-1	<not-identified>
GPLPVQPTADTTTHVTPR	180417_07	13667	36.85	1164.52	3	3491.54	1603.55	22030000	HexNAc2Hex2NeuAc3
VEDLHVGATVAPSSR	180417_07	13676	36.87	829.045	3	2485.12	947.323	11020000	HexNAcHexNeuAc2
GQQGQGPWGTGGTPHGPR	180417_07	13712	36.95	908.06	3	2722.17	947.329	11020000	HexNAcHexNeuAc2
VEDLHVGATVAPSSR	180417_07	13725	36.98	1242.16	3	3724.46	2186.66	-1	<not-identified>
VGPVRPTGQDWNHTPQK	180417_07	13737	37	955.437	3	2864.3	947.323	11020000	HexNAcHexNeuAc2
VEDLHVGATVAPSSR	180417_07	13742	37	1241.48	3	3722.42	2184.62	-1	<not-identified>
VGPVRPTGQDWNHTPQK	180417_07	13938	37.38	716.829	4	2864.3	947.322	11020000	HexNAcHexNeuAc2
GPLPVQPTADTTTHVTPR	180417_07	13948	37.4	1164.52	3	3491.55	1603.55	22030000	HexNAc2Hex2NeuAc3
GPLPVQPTADTTTHVTPR	180417_07	13986	37.48	1164.86	3	3492.58	1604.59	-1	<not-identified>
GQQGQGPWGTGGTPHGPR	180417_07	13987	37.48	1361.53	3	4082.59	2307.75	-1	<not-identified>
VEDLHVGATVAPSSR	180417_07	14016	37.53	732.014	3	2194.03	656.231	11010000	HexNAcHexNeuAc
VGPVRPTGQDWNHTPQK	180417_07	14022	37.53	955.439	3	2864.3	947.328	11020000	HexNAcHexNeuAc2
VEDLHVGATVAPSSR	180417_07	14056	37.6	1098.79	3	3294.34	1756.55	-1	<not-identified>
HLVTTVPKDPEAAE	180417_07	14101	37.68	1081.43	3	3242.28	1735.5	-1	<not-identified>
HLVTTVPKDPEAAE	180417_07	14178	37.82	721.675	3	2163.01	656.23	11010000	HexNAcHexNeuAc
GPLPVQPTADTTTHVTPR	180417_07	14186	37.83	1067.49	3	3200.45	1312.46	22020000	HexNAc2Hex2NeuAc2
GPLPVQPTADTTTHVTPR	180417_07	14308	38.07	800.869	4	3200.46	1312.46	22020000	HexNAc2Hex2NeuAc2
VEDLHVGATVAPSSR	180417_07	14309	38.08	732.015	3	2194.03	656.232	11010000	HexNAcHexNeuAc
VEDLHVGATVAPSSR	180417_07	14336	38.13	730.971	3	2190.9	653.101	-1	<not-identified>
VEDLHVGATVAPSSR	180417_07	14341	38.13	1097.41	3	3290.2	1752.41	-1	<not-identified>
VWGQGQSPRPENSLER	180417_07	14379	38.2	1051.47	3	3152.39	1312.48	-1	<not-identified>
AVAVTLQSH	180417_07	14428	38.3	816.677	3	2448.02	1522.51	22121010	HexNAc2Hex2FucNeuAcNeuAcAcNa
GPLPVQPTADTTTHVTPR	180417_07	14434	38.32	1067.76	3	3201.27	1313.27	-1	<not-identified>
HLVTTVPKDPEAAE	180417_07	14438	38.32	1082.41	3	3245.21	1738.43	-1	<not-identified>
VATTVISK	180417_07	14580	38.57	736.98	3	2208.93	1390.43	-1	<not-identified>
DKEC(Carbamidomethyl)TEC(Carbamidomethyl)DPLPNPSLTAR	180417_07	14751	38.9	1236.17	3	3706.49	1603.54	22030000	HexNAc2Hex2NeuAc3
SLTVSLGPVSK	180417_07	14782	38.95	905.064	3	2713.18	1625.54	22030010	HexNAc2Hex2NeuAc3Na
SLTVSLGPVSK	180417_07	14804	39	1346.19	3	4036.55	2948.91	-1	<not-identified>
SLTVSLGPVSK	180417_07	14829	39.03	897.734	3	2691.19	1603.55	22030000	HexNAc2Hex2NeuAc3
AVAVTLQSH	180417_07	14834	39.05	1141.14	3	3421.41	2495.9	-1	<not-identified>
AVAVTLQSH	180417_07	14866	39.1	893.082	3	2677.23	1751.72	-1	<not-identified>
VATTVISK	180417_07	14910	39.18	738.632	3	2213.88	1395.38	-1	<not-identified>
AVAVTLQSH	180417_07	14914	39.2	760.664	3	2279.98	1354.47	22021000	HexNAc2Hex2NeuAcNeuAcAc
AVAVTLQSH	180417_07	15031	39.42	957.377	3	2870.12	1944.61	-1	<not-identified>
VWGQGQSPRPENSLER	180417_07	15082	39.5	1026.79	3	3078.34	1238.43	-1	<not-identified>
AQGSQVLESTPPPHVMR	180417_07	15113	39.55	927.758	3	2781.26	947.331	11020000	HexNAcHexNeuAc2
VATTVISK	180417_07	15227	39.77	1066.08	3	3196.23	2377.73	-1	<not-identified>
VATTVISK	180417_07	15231	39.78	737.631	3	2210.88	1392.38	-1	<not-identified>
AVAVTLQSH	180417_07	15299	39.92	1276.53	3	3827.57	2902.06	-1	<not-identified>
AVAVTLQSH	180417_07	15305	39.93	638.953	3	1914.84	989.334	11021000	HexNAcHexNeuAcNeuAcAc
AVAVTLQSH	180417_07	15321	39.97	646.281	3	1936.83	1011.32	11021010	HexNAcHexNeuAcNeuAcAcNa
VWGQGQSPRPENSLER	180417_07	15342	40	929.751	3	2787.24	947.328	11020000	HexNAcHexNeuAc2
AVAVTLQSH	180417_07	15364	40.05	1276.9	3	3828.68	2903.17	-1	<not-identified>
AVAVTLQSH	180417_07	15383	40.08	1008.74	3	3024.22	2098.71	-1	<not-identified>
AVAVTLQSH	180417_07	15416	40.13	1152.49	3	3455.47	2529.96	-1	<not-identified>
AVAVTLQSH	180417_07	15421	40.15	1284.57	3	3851.69	2926.18	-1	<not-identified>
AVAVTLQSH	180417_07	15425	40.15	1383.58	3	4148.72	3223.21	-1	<not-identified>
AVAVTLQSH	180417_07	15426	40.17	1155.13	3	3463.37	2537.86	-1	<not-identified>
AVAVTLQSH	180417_07	15431	40.17	1292.85	3	3876.52	2951.01	-1	<not-identified>
AVAVTLQSH	180417_07	15447	40.2	1291.56	3	3872.67	2947.16	-1	<not-identified>
DKEC(Carbamidomethyl)TEC(Carbamidomethyl)DPLPNPSLTAR	180417_07	15459	40.22	1139.14	3	3415.4	1312.46	22020000	HexNAc2Hex2NeuAc2
AVAVTLQSH	180417_07	15463	40.23	1284.23	3	3850.67	2925.16	-1	<not-identified>
AVAVTLQSH	180417_07	15464	40.23	1539.31	3	4615.92	3690.41	-1	<not-identified>
AVAVTLQSH	180417_07	15514	40.32	1009.4	3	3026.18	2100.67	-1	<not-identified>
AVAVTLQSH	180417_07	15559	40.42	1531.63	3	4592.87	3667.36	-1	<not-identified>
AVAVTLQSH	180417_07	15591	40.47	638.953	3	1914.84	989.335	11021000	HexNAcHexNeuAcNeuAcAc
AVAVTLQSH	180417_07	15614	40.52	646.281	3	1936.83	1011.32	11021010	HexNAcHexNeuAcNeuAcAcNa
VWGQGQSPRPENSLER	180417_07	15628	40.53	929.751	3	2787.24	947.328	11020000	HexNAcHexNeuAc2
AVAVTLQSH	180417_07	15664	40.6	937.081	3	2809.23	1883.72	-1	<not-identified>
AVAVTLQSH	180417_07	15684	40.65	1124.43	3	3371.27	2445.76	-1	<not-identified>
DKEC(Carbamidomethyl)TEC(Carbamidomethyl)DPLPNPSLTAR	180417_07	15719	40.7	1139.48	3	3416.42	1313.47	22210000	HexNAc2Hex2Fuc2NeuAc
REHPHPTARPW	180417_07	15727	40.72	777.682	3	2331.03	947.33	11020000	HexNAcHexNeuAc2
AVAVTLQSH	180417_07	15810	40.88	1161.47	3	3482.41	2556.9	-1	<not-identified>
SLTVSLGPVSK	180417_07	16090	41.4	800.37	3	2399.1	1311.46	-1	<not-identified>
SLTVSLGPVSK	180417_07	16097	41.42	1200.79	3	3600.36	2512.72	-1	<not-identified>
SLTVSLGPVSK	180417_07	16124	41.47	800.701	3	2400.09	1312.45	22020000	HexNAc2Hex2NeuAc2
AVAVTLQSH	180417_07	16150	41.52	871.702	3	2613.09	1687.58	22032000	HexNAc2Hex2NeuAcNeuAcAc2
AVAVTLQSH	180417_07	16162	41.53	757.315	3	2269.93	1344.42	11032010	HexNAcHexNeuAcNeuAcAc2Na
AVAVTLQSH	180417_07	16207	41.62	872.035	3	2614.09	1688.58	-1	<not-identified>
AVAVTLQSH	180417_07	16208	41.62	879.026	3	2635.06	1709.55	-1	<not-identified>
SQGNINNPTPGPVPVPGPK	180417_07	16229	41.65	1158.84	3	3474.52	1604.53	-1	<not-identified>
VWGQGQSPRPENSLER	180417_07	16235	41.67	1040.79	3	3120.34	1280.43	11031000	HexNAcHexNeuAc2NeuAcAc
AVAVTLQSH	180417_07	16252	41.7	764.978	3	2292.92	1367.41	-1	<not-identified>
AVAVTLQSH	180417_07	16279	41.75	749.988	3	2247.95	1322.44	11032000	HexNAcHexNeuAcNeuAcAc2
VWGQGQSPRPENSLER	180417_07	16405	41.97	1041.07	3	3121.21	1281.3	-1	<not-identified>
AVAVTLQSH	180417_07	16518	42.17	763.991	3	2289.96	1364.45	11033000	HexNAcHexNeuAcNeuAcAcNeuAcAcAc
AHEVSEISVRTVYPPEEETGER	180417_07	16612	42.35	1103.09	3	3307.27	793.056	-1	<not-identified>
AVAVTLQSH	180417_07	16655	42.42	957.046	3	2869.12	1943.61	-1	<not-identified>
AVAVTLQSH	180417_07	16714	42.52	1124.49	3	3371.44	2445.93	-1	<not-identified>
VWGQGQSPRPENSLER	180417_07	16795	42.67	930.368	4	3718.45	1878.54	-1	<not-identified>
DALPDNENKKPTAIPK	180417_07	16863	42.8	1162.14	3	3484.42	1733.48	-1	<not-identified>
AHEVSEISVRTVYPPEEETGER	180417_07	16883	42.83	1470.63	3	4409.88	1895.67	-1	<not-identified>
DALPDNENKKPTAIPK	180417_07	16895	42.85	1162.49	3	3485.46	1734.52	-1	<not-identified>
AHEVSEISVRTVYPPEEETGER	180417_07	16897	42.85	1102.98	4	4408.89	1894.68	-1	<not-identified>
DKEC(Carbamidomethyl)TEC(Carbamidomethyl)DPLPNPSLTAR	180417_07	16908	42.87	1041.75	3	3123.24	1020.29	-1	<not-identified>
GNFLTGLGHR	180417_07	16934	42.92	795.348	3	2384.03	1312.46	22020000	HexNAc2Hex2NeuAc2
DKEC(Carbamidomethyl)TEC(Carbamidomethyl)DPLPNPSLTAR	180417_07	16943	42.95	1042.11	3	3124.32	1021.37	22010000	HexNAc2Hex2NeuAc
KAPPPSGASQTIK	180417_07	17002	43.05	1059.46	3	3176.38	1894.66	22040000	HexNAc2Hex2NeuAc4
DALPDNENKKPTAIPK	180417_07	17027	43.1	1148.17	3	3442.49	1691.56	-1	<not-identified>
VSHSAQPPAHQPPMISTK	180417_07	17027	43.1	1148.17	3	3442.49	1529.52	-1	<not-identified>
EEMGPVPAHTDAF	180417_07	17040	43.13	1174.46	3	3521.37	2120.76	-1	<not-identified>
DALPDNENKKPTAIPK	180417_07	17071	43.18	1064.48	3	3191.42	1440.49	-1	<not-identified>
DKEC(Carbamidomethyl)TEC(Carbamidomethyl)DPLPNPSLTAR	180417_07	17081	43.2	1139.14	3	3415.41	1312.46	22020000	HexNAc2Hex2NeuAc2
KAPPPSGASQTIK	180417_07	17082	43.2	1059.13	3	3175.37	1893.65	-1	<not-identified>
WTHSYL	180417_07	17129	43.28	925.416	3	2774.23	1967.85	-1	<not-identified>
VWGQGQSPRPENSLER	180417_07	17134	43.3	929.745	3	2787.22	947.311	-1	<not-identified>
RDFTAAFPR	180417_07	17147	43.32	798.341	3	2393.01	1312.45	22020000	HexNAc2Hex2NeuAc2
RDFTAAFPR	180417_07	17168	43.37	798.008	3	2392.01	1311.45	-1	<not-identified>
DALPDNENKKPTAIPK	180417_07	17177	43.38	1064.45	3	3191.35	1440.41	-1	<not-identified>
PRTLPPLPPGPTPAQQPGR	180417_07	17209	43.43	969.701	4	3875.78	1898.68	-1	<not-identified>
AHEVSEISVRTVYPPEEETGER	180417_07	17215	43.45	1470.62	3	4409.85	1895.63	-1	<not-identified>
WTHSYL	180417_07	17245	43.5	925.752	3	2775.24	1968.86	-1	<not-identified>
AHEVSEISVRTVYPPEE	180417_07	17307	43.62	1279.54	3	3836.62	1894.66	22040000	HexNAc2Hex2NeuAc4
WTHSYL	180417_07	17308	43.62	1170.13	3	3508.38	2702	-1	<not-identified>
WTHSYL	180417_07	17352	43.7	1213.48	3	3638.43	2832.05	-1	<not-identified>
DLSDALPDNENKKPTAIPK	180417_07	17374	43.75	1005.14	3	3013.4	947.328	11020000	HexNAcHexNeuAc2
AHEVSEISVRTVYPPEE	180417_07	17425	43.85	1280.2	3	3838.59	1896.64	-1	<not-identified>
SDALPDNENKKPTAIPK	180417_07	17468	43.93	748.382	3	2243.13	405.165	-1	<not-identified>
ALSPQQVTRLPSGY	180417_07	17478	43.95	943.762	3	2829.27	1312.46	22020000	HexNAc2Hex2NeuAc2
SDALPDNENKKPTAIPK	180417_07	17487	43.97	1050.48	3	3149.43	1311.47	-1	<not-identified>
RLTPGVHELPVQQPEHR	180417_07	17490	43.97	980.804	3	2940.4	947.324	11020000	HexNAcHexNeuAc2
TMHVATVFTDGGPRTLR	180417_07	17529	44.05	1057.81	3	3171.41	1312.45	22020000	HexNAc2Hex2NeuAc2
AQDGGPVGTELFR	180417_07	17533	44.05	1339.58	3	4016.71	2670.04	-1	<not-identified>
RLTPGVHELPVQQPEHR	180417_07	17545	44.07	800.751	3	2400.24	407.166	-1	<not-identified>
AHEVSEISVRTVYPPEE	180417_07	17555	44.1	1279.87	3	3837.6	1895.65	-1	<not-identified>
ALSPQQVTRLPSGY	180417_07	17568	44.12	1188.81	3	3564.43	2047.61	-1	<not-identified>
DFTAAFPR	180417_07	17572	44.13	868.02	3	2602.05	1677.59	33020000	HexNAc3Hex3NeuAc2
WTHSYL	180417_07	17594	44.17	1474.57	3	4421.71	3615.32	-1	<not-identified>
WTHSYL	180417_07	17595	44.17	1467.24	3	4399.7	3593.32	-1	<not-identified>
WTHSYL	180417_07	17605	44.18	1498.59	3	4493.75	3687.36	-1	<not-identified>
WTHSYL	180417_07	17616	44.2	1482.23	3	4444.68	3638.29	-1	<not-identified>
WTHSYL	180417_07	17621	44.22	1570.62	3	4709.83	3903.45	-1	<not-identified>
SDALPDNENKKPTAIPK	180417_07	17633	44.23	788.112	4	3149.43	1311.46	-1	<not-identified>
AVAVTLQSH	180417_07	17642	44.25	958.431	3	2873.28	1947.77	-1	<not-identified>
WTHSYL	180417_07	17658	44.28	1466.9	3	4398.7	3592.32	-1	<not-identified>
DLSDALPDNENKKPTAIPK	180417_07	17671	44.3	1005.14	3	3013.4	947.327	11020000	HexNAcHexNeuAc2
SDALPDNENKKPTAIPK	180417_07	17697	44.35	831.738	3	2493.2	655.234	-1	<not-identified>
ALSPQQVTRLPSGY	180417_07	17772	44.5	943.762	3	2829.27	1312.46	22020000	HexNAc2Hex2NeuAc2
SDALPDNENKKPTAIPK	180417_07	17784	44.52	748.383	3	2243.13	405.168	-1	<not-identified>
RLTPGVHELPVQQPEHR	180417_07	17793	44.53	980.805	3	2940.4	947.328	11020000	HexNAcHexNeuAc2
DFTAAFPR	180417_07	17803	44.55	770.987	3	2310.95	1386.49	33010000	HexNAc3Hex3NeuAc
RDFTAAFPR	180417_07	17805	44.55	676.633	3	2027.88	947.325	11020000	HexNAcHexNeuAc2
SDALPDNENKKPTAIPK	180417_07	17833	44.62	832.073	3	2494.21	656.24	-1	<not-identified>
DFTAAFPR	180417_07	17854	44.65	1156.47	3	3467.41	2542.95	-1	<not-identified>
WTHSYL	180417_07	17876	44.68	1467.58	3	4400.72	3594.34	-1	<not-identified>
DKEC(Carbamidomethyl)TEC(Carbamidomethyl)DPLPNPSLTAR	180417_07	17892	44.72	1017.43	3	3050.28	947.327	11020000	HexNAcHexNeuAc2
DFTAAFPR	180417_07	17893	44.72	868.021	3	2602.05	1677.59	33020000	HexNAc3Hex3NeuAc2
SDALPDNENKKPTAIPK	180417_07	17896	44.73	928.773	3	2784.3	946.337	-1	<not-identified>
RLTPGVHELPVQQPEHR	180417_07	17897	44.73	981.139	3	2941.4	948.328	-1	<not-identified>
WTHSYL	180417_07	17914	44.77	1293.5	3	3878.49	3072.1	-1	<not-identified>
GLSAVPPTRVPGPLAPR	180417_07	17928	44.8	895.663	4	3579.63	1894.65	22040000	HexNAc2Hex2NeuAc4
WTHSYL	180417_07	17933	44.8	1491.59	3	4472.76	3666.38	-1	<not-identified>
WTHSYL	180417_07	17955	44.83	1008.72	3	3024.14	2217.76	-1	<not-identified>
SLTVSLGPVSK	180417_07	18008	44.93	800.703	3	2400.09	1312.46	22020000	HexNAc2Hex2NeuAc2
TMHVATVFTDGGPRTLR	180417_07	18037	45	936.099	3	2806.28	947.322	11020000	HexNAcHexNeuAc2
TMHVATVFTDGGPRTLR	180417_07	18058	45.03	936.43	3	2807.28	948.317	-1	<not-identified>
WTHSYL	180417_07	18060	45.03	1009.9	4	4036.58	3230.19	-1	<not-identified>
SDALPDNENKKPTAIPK	180417_07	18121	45.18	1033.49	3	3098.46	1260.5	-1	<not-identified>
DKEC(Carbamidomethyl)TEC(Carbamidomethyl)DPLPNPSLTAR	180417_07	18140	45.22	920.396	3	2759.17	656.224	11010000	HexNAcHexNeuAc
QLQPVPATQEPDKILPR	180417_07	18149	45.23	1081.52	3	3242.55	1312.47	-1	<not-identified>
KAPPPSGASQTIK	180417_07	18177	45.28	963.44	3	2888.31	1606.59	-1	<not-identified>
SDALPDNENKKPTAIPK	180417_07	18185	45.3	928.771	3	2784.3	946.332	-1	<not-identified>
AQDGGPVGTELFR	180417_07	18190	45.32	1329.21	3	3985.62	2638.95	-1	<not-identified>
WTHSYL	180417_07	18206	45.33	1089.45	3	3266.33	2459.94	-1	<not-identified>
QLQPVPATQEPDKILPR	180417_07	18229	45.38	1081.85	3	3243.54	1313.46	-1	<not-identified>
DKEC(Carbamidomethyl)TEC(Carbamidomethyl)DPLPNPSLTAR	180417_07	18245	45.42	1017.43	3	3050.28	947.333	-1	<not-identified>
ALSPQQVTRLPSGY	180417_07	18267	45.45	1444.58	3	4331.72	2814.91	-1	<not-identified>
AQDGGPVGTELFR	180417_07	18271	45.47	887.05	3	2659.13	1312.46	22020000	HexNAc2Hex2NeuAc2
AQDGGPVGTELFR	180417_07	18277	45.47	1329.52	3	3986.55	2639.88	-1	<not-identified>
DALPDNENKKPTAIPK	180417_07	18300	45.52	953.775	3	2859.31	1108.38	-1	<not-identified>
VSHSAQPPAHQPPMISTK	180417_07	18300	45.52	953.775	3	2859.31	946.342	-1	<not-identified>
WTHSYL	180417_07	18407	45.72	1292.19	3	3874.54	3068.16	-1	<not-identified>
KAPPPSGASQTIK	180417_07	18411	45.72	961.117	3	2881.34	1599.62	-1	<not-identified>
DKEC(Carbamidomethyl)TEC(Carbamidomethyl)DPLPNPSLTAR	180417_07	18448	45.78	920.398	3	2759.18	656.23	11010000	HexNAcHexNeuAc
SDALPDNENKKPTAIPK	180417_07	18498	45.87	928.771	3	2784.3	946.334	-1	<not-identified>
KAPPPSGASQTIK	180417_07	18533	45.93	962.098	3	2884.28	1602.56	-1	<not-identified>
DFTAAFPR	180417_07	18586	46.03	1120.46	3	3359.38	2434.92	-1	<not-identified>
DFTAAFPR	180417_07	18606	46.07	1332.53	3	3995.57	3071.11	-1	<not-identified>
DKEC(Carbamidomethyl)TEC(Carbamidomethyl)DPLPNPSLTAR	180417_07	18753	46.35	920.398	3	2759.18	656.232	11010000	HexNAcHexNeuAc
KAPPPSGASQTIK	180417_07	18807	46.43	962.429	3	2885.27	1603.56	22030000	HexNAc2Hex2NeuAc3
DKEC(Carbamidomethyl)TEC(Carbamidomethyl)DPLPNPSLTAR	180417_07	18910	46.63	919.74	3	2757.21	654.257	-1	<not-identified>
ILEPTQIPGMK	180417_07	18930	46.67	1087.51	3	3260.52	2033.84	-1	<not-identified>
NQVTPLDILSK	180417_07	18930	46.67	1087.51	3	3260.52	2032.82	-1	<not-identified>
DKEC(Carbamidomethyl)TEC(Carbamidomethyl)DPLPNPSLTAR	180417_07	18948	46.7	920.075	3	2758.21	655.262	-1	<not-identified>
ATAPTAQAPR	180417_07	19000	46.8	966.087	3	2896.25	1912.72	-1	<not-identified>
ILEPTQIPGMK	180417_07	19024	46.85	725.337	3	2174	947.316	11020000	HexNAcHexNeuAc2
DFTAAFPR	180417_07	19256	47.28	624.599	3	1871.78	947.326	11020000	HexNAcHexNeuAc2
KAPPPSGASQTIK	180417_07	19273	47.32	962.43	3	2885.28	1603.56	22030000	HexNAc2Hex2NeuAc3
NQVTPLDILSK	180417_07	19384	47.55	1416.55	3	4247.65	3019.95	-1	<not-identified>
GNFLTGLGHR	180417_07	19413	47.6	1010.15	4	4037.59	2966.02	-1	<not-identified>
NQVTPLDILSK	180417_07	19474	47.7	944.756	3	2832.25	1604.56	-1	<not-identified>
DFTAAFPR	180417_07	19538	47.83	624.598	3	1871.78	947.323	11020000	HexNAcHexNeuAc2
GNFLTGLGHR	180417_07	19631	48	1009.9	4	4036.59	2965.02	-1	<not-identified>
AQDGGPVGTELFR	180417_07	19641	48.02	765.336	3	2293.99	947.323	11020000	HexNAcHexNeuAc2
AQDGGPVGTELFR	180417_07	19647	48.03	771.014	3	2311.03	964.358	-1	<not-identified>
KAPPPSGASQTIK	180417_07	19719	48.17	865.065	3	2593.18	1311.46	-1	<not-identified>
DGLSLPEDIETVTASQMR	180417_07	19803	48.33	969.764	3	2907.28	945.328	-1	<not-identified>
KAPPPSGASQTIK	180417_07	19803	48.33	969.764	3	2907.28	1625.56	-1	<not-identified>
LSEPGLIC(Carbamidomethyl)PDSTPPPHLR	180417_07	19946	48.6	1003.13	3	3007.38	1021.36	22010000	HexNAc2Hex2NeuAc
LSEPGLIC(Carbamidomethyl)PDSTPPPHLR	180417_07	19979	48.65	1003.47	3	3008.39	1022.38	-1	<not-identified>
KAPPPSGASQTIK	180417_07	20017	48.73	865.064	3	2593.18	1311.46	-1	<not-identified>
AQDGGPVGTELFR	180417_07	20027	48.75	1147.51	3	3440.51	2093.84	-1	<not-identified>
SLTVSLGPVSKTEGFPK	180417_07	20146	48.95	1156.2	3	3466.59	1719.63	-1	<not-identified>
LSEPGLIC(Carbamidomethyl)PDSTPPPHLR	180417_07	20210	49.07	1100.16	3	3298.46	1312.45	22020000	HexNAc2Hex2NeuAc2
SLTVSLGPVSKTEGFPK	180417_07	20233	49.12	1155.87	3	3465.6	1718.63	-1	<not-identified>
LSEPGLIC(Carbamidomethyl)PDSTPPPHLR	180417_07	20257	49.15	1002.47	3	3005.39	1019.38	-1	<not-identified>
AVAVTLQSH	180417_07	20266	49.17	958.891	4	3832.54	2907.03	-1	<not-identified>
LSEPGLIC(Carbamidomethyl)PDSTPPPHLR	180417_07	20311	49.25	825.374	4	3298.47	1312.46	22020000	HexNAc2Hex2NeuAc2
LSEPGLIC(Carbamidomethyl)PDSTPPPHLR	180417_07	20312	49.27	1167.86	3	3501.56	1515.55	32020000	HexNAc3Hex2NeuAc2
KAPPPSGASQTIK	180417_07	20316	49.27	865.064	3	2593.18	1311.46	-1	<not-identified>
LSEPGLIC(Carbamidomethyl)PDSTPPPHLR	180417_07	20328	49.3	829.631	4	3315.5	1329.49	-1	<not-identified>
LSEPGLIC(Carbamidomethyl)PDSTPPPHLR	180417_07	20338	49.32	1003.47	3	3008.38	1022.37	-1	<not-identified>
LSEPGLIC(Carbamidomethyl)PDSTPPPHLR	180417_07	20437	49.5	1168.18	3	3502.53	1516.52	-1	<not-identified>
AQDGGPVGTELF	180417_07	20453	49.53	1260.53	3	3779.59	2589.02	-1	<not-identified>
LSEPGLIC(Carbamidomethyl)PDSTPPPHLR	180417_07	20490	49.6	825.623	4	3299.47	1313.46	-1	<not-identified>
LSEPGLIC(Carbamidomethyl)PDSTPPPHLR	180417_07	20512	49.63	1100.16	3	3298.47	1312.46	22020000	HexNAc2Hex2NeuAc2
AQDGGPVGTELF	180417_07	20560	49.72	840.688	3	2520.05	1329.48	23110000	HexNAc2Hex3FucNeuAc
ATAPTAQAPR	180417_07	20564	49.73	1148.48	3	3443.43	2459.91	-1	<not-identified>
REHPHPTARPW	180417_07	20622	49.83	1166.3	4	4662.18	3278.47	-1	<not-identified>
GLSAVPPTRVPGPLAPR	180417_07	20681	49.95	878.108	3	2632.31	947.324	11020000	HexNAcHexNeuAc2
LSEPGLIC(Carbamidomethyl)PDSTPPPHLR	180417_07	20836	50.23	1100.17	3	3298.48	1312.47	-1	<not-identified>
LSEPGLIC(Carbamidomethyl)PDSTPPPHLR	180417_07	20900	50.35	1049.13	3	3145.38	1159.37	-1	<not-identified>
LSEPGLIC(Carbamidomethyl)PDSTPPPHLR	180417_07	20955	50.45	1049.47	3	3146.4	1160.39	-1	<not-identified>
LSEPGLIC(Carbamidomethyl)PDSTPPPHLR	180417_07	21024	50.58	978.451	3	2933.34	947.326	11020000	HexNAcHexNeuAc2
REHPHPTARPW	180417_07	21025	50.58	1166.8	4	4664.17	3280.47	-1	<not-identified>
DGLSLPEDIETVTASQMR	180417_07	21068	50.65	969.767	3	2907.29	945.337	-1	<not-identified>
KAPPPSGASQTIK	180417_07	21068	50.65	969.767	3	2907.29	1625.57	-1	<not-identified>
REHPHPTARPW	180417_07	21110	50.73	1450.32	3	4348.95	2965.25	-1	<not-identified>
LSEPGLIC(Carbamidomethyl)PDSTPPPHLR	180417_07	21149	50.8	1100.17	3	3298.48	1312.47	-1	<not-identified>
SLTVSLGPVSKTEGFPK	180417_07	21159	50.82	1131.19	3	3391.55	1644.59	-1	<not-identified>
KAPPPSGASQTIK	180417_07	21195	50.88	968.72	3	2904.15	1622.43	-1	<not-identified>
KSATVIPEIEGIK	180417_07	21249	50.98	997.435	3	2990.29	1605.49	-1	<not-identified>
AQDGGPVGTELF	180417_07	21271	51.02	835.015	3	2503.03	1312.46	22020000	HexNAc2Hex2NeuAc2
ATAPTAQAPR	180417_07	21313	51.1	965.421	3	2894.25	1910.72	-1	<not-identified>
LSEPGLIC(Carbamidomethyl)PDSTPPPHLR	180417_07	21322	51.12	1100.5	3	3299.49	1313.48	22210000	HexNAc2Hex2Fuc2NeuAc
SLTVSLGPVSKTEGFPK	180417_07	21339	51.15	1228.22	3	3682.65	1935.68	-1	<not-identified>
DGLSLPEDIETVTASQMR	180417_07	21344	51.15	970.096	3	2908.27	946.326	-1	<not-identified>
SLTVSLGPVSKTEGFPK	180417_07	21431	51.32	1214.55	3	3641.63	1894.67	-1	<not-identified>
SLTVSLGPVSKTEGFPK	180417_07	21463	51.37	1131.19	3	3391.54	1644.58	-1	<not-identified>
SLTVSLGPVSKTEGFPK	180417_07	21509	51.45	1228.55	3	3683.64	1936.67	-1	<not-identified>
LSEPGLIC(Carbamidomethyl)PDSTPPPHLR	180417_07	21541	51.52	978.784	3	2934.34	948.324	-1	<not-identified>
SLTVSLGPVSKTEGFPK	180417_07	21711	51.83	1131.2	3	3391.58	1644.62	-1	<not-identified>
LSEPGLIC(Carbamidomethyl)PDSTPPPHLR	180417_07	21717	51.83	978.453	3	2933.34	947.332	11020000	HexNAcHexNeuAc2
SLTVSLGPVSKTEGFPK	180417_07	21720	51.85	1214.55	3	3641.62	1894.66	22040000	HexNAc2Hex2NeuAc4
DVSTPPTVLPDNFPR	180417_07	21811	52.02	1251.53	3	3752.57	2097.73	-1	<not-identified>
SLTVSLGPVSKTEGFPK	180417_07	21816	52.02	1131.51	3	3392.5	1645.54	-1	<not-identified>
SLTVSLGPVSKTEGFPK	180417_07	21821	52.03	1117.51	3	3350.52	1603.55	22030000	HexNAc2Hex2NeuAc3
DVSTPPTVLPDNFPR	180417_07	21826	52.03	1251.87	3	3753.58	2098.74	-1	<not-identified>
SLTVSLGPVSKTEGFPK	180417_07	21843	52.07	1214.88	3	3642.61	1895.65	-1	<not-identified>
DVSTPPTVLPDNFPR	180417_07	21884	52.15	1252.53	3	3755.56	2100.72	-1	<not-identified>
SLTVSLGPVSKTEGFPK	180417_07	21902	52.17	1215.21	3	3643.62	1896.66	-1	<not-identified>
SLTVSLGPVSKTEGFPK	180417_07	21913	52.2	1034.15	3	3100.45	1353.48	-1	<not-identified>
SLTVSLGPVSKTEGFPK	180417_07	22106	52.57	1117.51	3	3350.52	1603.56	22030000	HexNAc2Hex2NeuAc3
RGGADTYSVPSVLSPR	180417_07	22155	52.67	869.416	3	2606.23	944.374	-1	<not-identified>
SLTVSLGPVSKTEGFPK	180417_07	22312	52.97	1020.48	3	3059.42	1312.46	22020000	HexNAc2Hex2NeuAc2
RGGADTYSVPSVLSPR	180417_07	22420	53.17	870.4	3	2609.19	947.326	11020000	HexNAcHexNeuAc2
NQVTPLDILSK	180417_07	22772	53.87	1270.58	3	3809.71	2582.02	-1	<not-identified>
KSATVIPEIEGIK	180417_07	22789	53.9	899.758	3	2697.26	1312.46	22020000	HexNAc2Hex2NeuAc2
NQVTPLDILSK	180417_07	22800	53.93	847.392	3	2540.16	1312.47	22020000	HexNAc2Hex2NeuAc2
DVSTPPTVLPDNFPR	180417_07	22823	53.97	1301.55	3	3902.65	2247.81	-1	<not-identified>
KSATVIPEIEGIK	180417_07	22874	54.08	778.336	3	2332.99	948.188	-1	<not-identified>
VVPDSTPSWANPSPTPVISM	180417_07	22883	54.1	1258.53	3	3773.58	1691.56	-1	<not-identified>
DVSTPPTVLPDNFPR	180417_07	22888	54.1	1301.22	3	3901.64	2246.8	-1	<not-identified>
KSATVIPEIEGIK	180417_07	23073	54.47	778.048	3	2332.13	947.325	11020000	HexNAcHexNeuAc2
DVSTPPTVLPDNFPR	180417_07	23402	55.17	1009.12	3	3025.35	1370.5	32110000	HexNAc3Hex2FucNeuAc
DVSTPPTVLPDNFPR	180417_07	23542	55.45	1208.5	3	3623.48	1968.63	-1	<not-identified>
ESTPPPHVMR	180417_07	23562	55.48	1346.54	3	4037.59	2887.03	-1	<not-identified>
DVSTPPTVLPDNFPR	180417_07	23592	55.55	1092.49	3	3275.46	1620.61	-1	<not-identified>
DVSTPPTVLPDNFPR	180417_07	23593	55.55	1208.52	3	3623.54	1968.69	33030000	HexNAc3Hex3NeuAc3
LEGLLESPSPGTSWTTR	180417_07	23628	55.63	1572.65	3	4715.94	2885.01	-1	<not-identified>
DVSTPPTVLPDNFPR	180417_07	23664	55.7	1417.28	3	4249.82	2594.97	-1	<not-identified>
DVSTPPTVLPDNFPR	180417_07	23699	55.77	1086.8	3	3258.4	1603.56	22030000	HexNAc2Hex2NeuAc3
DVSTPPTVLPDNFPR	180417_07	23703	55.78	888.372	4	3550.47	1895.62	-1	<not-identified>
DVSTPPTVLPDNFPR	180417_07	23824	56.02	815.857	4	3260.41	1605.56	-1	<not-identified>
DVSTPPTVLPDNFPR	180417_07	23825	56.02	1032.78	3	3096.34	1441.49	-1	<not-identified>
DVSTPPTVLPDNFPR	180417_07	23852	56.07	1183.84	3	3549.5	1894.65	22040000	HexNAc2Hex2NeuAc4
DGGFDLSDALPDNENKKPTAIPK	180417_07	23916	56.2	1130.52	3	3389.56	947.344	-1	<not-identified>
SDALPDNENKKPTAIPK	180417_07	23948	56.25	848.142	4	3389.55	1551.58	-1	<not-identified>
DVSTPPTVLPDNFPR	180417_07	23967	56.28	935.754	3	2805.25	1150.4	21020000	HexNAc2HexNeuAc2
DVSTPPTVLPDNFPR	180417_07	23983	56.32	1009.12	3	3025.35	1370.5	32110000	HexNAc3Hex2FucNeuAc
DVSTPPTVLPDNFPR	180417_07	24120	56.58	1032.79	3	3096.36	1441.51	-1	<not-identified>
DVSTPPTVLPDNFPR	180417_07	24133	56.62	1183.84	3	3549.5	1894.66	22040000	HexNAc2Hex2NeuAc4
DVSTPPTVLPDNFPR	180417_07	24134	56.62	989.773	3	2967.31	1312.46	22020000	HexNAc2Hex2NeuAc2
DVSTPPTVLPDNFPR	180417_07	24262	56.87	1086.8	3	3258.4	1603.55	22030000	HexNAc2Hex2NeuAc3
DVSTPPTVLPDNFPR	180417_07	24344	57.03	1294.53	3	3881.56	2226.72	-1	<not-identified>
DVSTPPTVLPDNFPR	180417_07	24360	57.07	1294.85	3	3882.54	2227.7	-1	<not-identified>
DVSTPPTVLPDNFPR	180417_07	24404	57.15	989.772	3	2967.3	1312.46	22020000	HexNAc2Hex2NeuAc2
DVSTPPTVLPDNFPR	180417_07	24674	57.67	989.771	3	2967.3	1312.46	22020000	HexNAc2Hex2NeuAc2
DVSTPPTVLPDNFPR	180417_07	24765	57.83	742.581	4	2967.3	1312.46	22020000	HexNAc2Hex2NeuAc2
DC(Carbamidomethyl)LGC(Carbamidomethyl)VHPISTQSPDLEPILR	180417_07	24789	57.87	1143.52	3	3428.53	1021.36	22010000	HexNAc2Hex2NeuAc
DVSTPPTVLPDNFPR	180417_07	24864	58.03	1086.8	3	3258.4	1603.55	22030000	HexNAc2Hex2NeuAc3
DVSTPPTVLPDNFPR	180417_07	24914	58.12	1187.86	3	3561.57	1906.73	-1	<not-identified>
DVSTPPTVLPDNFPR	180417_07	24932	58.15	1111.47	3	3332.38	1677.54	-1	<not-identified>
DVSTPPTVLPDNFPR	180417_07	24951	58.18	892.737	3	2676.2	1021.35	22010000	HexNAc2Hex2NeuAc
DVSTPPTVLPDNFPR	180417_07	24958	58.2	989.772	3	2967.3	1312.46	22020000	HexNAc2Hex2NeuAc2
DVSTPPTVLPDNFPR	180417_07	25022	58.32	989.772	3	2967.3	1312.46	22020000	HexNAc2Hex2NeuAc2
DVSTPPTVLPDNFPR	180417_07	25042	58.35	1239.57	3	3716.7	2061.86	-1	<not-identified>
DVSTPPTVLPDNFPR	180417_07	25071	58.42	1239.57	3	3716.68	2061.84	-1	<not-identified>
VAADAVPGSEAPGPRPEADTTR	180417_07	25091	58.45	1019.46	4	4074.81	1910.75	-1	<not-identified>
VAADAVPGSEAPGPRPEADTTR	180417_07	25109	58.48	1353.57	3	4058.71	1894.65	22040000	HexNAc2Hex2NeuAc4
VAADAVPGSEAPGPRPEADTTR	180417_07	25132	58.53	1015.44	4	4058.72	1894.66	22040000	HexNAc2Hex2NeuAc4
DVSTPPTVLPDNFPR	180417_07	25165	58.6	1086.8	3	3258.4	1603.55	22030000	HexNAc2Hex2NeuAc3
DVSTPPTVLPDNFPR	180417_07	25173	58.62	1003.45	3	3008.33	1353.48	-1	<not-identified>
VAADAVPGSEAPGPRPEADTTR	180417_07	25222	58.7	1353.24	3	4057.7	1893.64	-1	<not-identified>
DVSTPPTVLPDNFPR	180417_07	25244	58.73	989.772	3	2967.3	1312.46	22020000	HexNAc2Hex2NeuAc2
VAADAVPGSEAPGPRPEADTTR	180417_07	25280	58.8	1015.18	4	4057.71	1893.65	-1	<not-identified>
ALGSLHLPTNPTSLPAVAK	180417_07	25290	58.83	849.129	4	3393.5	1506.43	-1	<not-identified>
VAADAVPGSEAPGPRPEADTTR	180417_07	25349	58.93	1019.44	4	4074.72	1910.66	-1	<not-identified>
ALGSLHLPTNPTSLPAVAK	180417_07	25375	58.98	848.441	3	2543.31	656.239	-1	<not-identified>
DC(Carbamidomethyl)LGC(Carbamidomethyl)VHPISTQSPDLEPILR	180417_07	25443	59.12	1308.24	3	3922.7	1515.53	32020000	HexNAc3Hex2NeuAc2
DC(Carbamidomethyl)LGC(Carbamidomethyl)VHPISTQSPDLEPILR	180417_07	25456	59.15	1240.55	3	3719.65	1312.47	-1	<not-identified>
VAADAVPGSEAPGPRPEADTTR	180417_07	25461	59.15	1020.93	4	4080.69	1916.62	-1	<not-identified>
DC(Carbamidomethyl)LGC(Carbamidomethyl)VHPISTQSPDLEPILR	180417_07	25491	59.22	930.663	4	3719.63	1312.46	22020000	HexNAc2Hex2NeuAc2
VAADAVPGSEAPGPRPEADTTR	180417_07	25506	59.23	1020.68	4	4079.7	1915.64	-1	<not-identified>
VAADAVPGSEAPGPRPEADTTR	180417_07	25535	59.28	1353.24	3	4057.69	1893.63	-1	<not-identified>
VAADAVPGSEAPGPRPEADTTR	180417_07	25577	59.37	1015.43	4	4058.7	1894.64	22040000	HexNAc2Hex2NeuAc4
DVSTPPTVLPDNFPR	180417_07	25627	59.47	989.773	3	2967.31	1312.46	22020000	HexNAc2Hex2NeuAc2
DC(Carbamidomethyl)LGC(Carbamidomethyl)VHPISTQSPDLEPILR	180417_07	25795	59.77	1240.55	3	3719.65	1312.47	-1	<not-identified>
DC(Carbamidomethyl)LGC(Carbamidomethyl)VHPISTQSPDLEPILR	180417_07	26132	60.45	1184.51	3	3551.53	1144.35	-1	<not-identified>
DC(Carbamidomethyl)LGC(Carbamidomethyl)VHPISTQSPDLEPILR	180417_07	26147	60.47	1184.19	3	3550.56	1143.39	-1	<not-identified>
DC(Carbamidomethyl)LGC(Carbamidomethyl)VHPISTQSPDLEPILR	180417_07	26215	60.6	1118.84	3	3354.51	947.334	-1	<not-identified>
DC(Carbamidomethyl)LGC(Carbamidomethyl)VHPISTQSPDLEPILR	180417_07	26247	60.67	1189.85	3	3567.55	1160.37	-1	<not-identified>
DC(Carbamidomethyl)LGC(Carbamidomethyl)VHPISTQSPDLEPILR	180417_07	26274	60.72	1021.81	3	3063.41	656.231	11010000	HexNAcHexNeuAc
DC(Carbamidomethyl)LGC(Carbamidomethyl)VHPISTQSPDLEPILR	180417_07	26304	60.77	1306.23	3	3916.68	1509.51	-1	<not-identified>
DC(Carbamidomethyl)LGC(Carbamidomethyl)VHPISTQSPDLEPILR	180417_07	26399	60.95	1184.18	3	3550.52	1143.34	-1	<not-identified>
NKYPDAVATWLNPDPSQK	180417_07	26473	61.08	998.397	4	3990.57	1946.55	-1	<not-identified>
VAADAVPGSEAPGPRPEADTTR	180417_07	26478	61.1	1368.24	3	4102.71	1938.64	-1	<not-identified>
VAADAVPGSEAPGPRPEADTTR	180417_07	26493	61.13	1367.57	3	4100.71	1936.64	-1	<not-identified>
NKYPDAVATWLNPDPSQK	180417_07	26577	61.3	998.114	3	2992.33	948.315	-1	<not-identified>
NKYPDAVATWLNPDPSQK	180417_07	26592	61.33	997.787	3	2991.35	947.332	11020000	HexNAcHexNeuAc2
NKYPDAVATWLNPDPSQK	180417_07	26692	61.52	1496.6	3	4487.78	2443.77	-1	<not-identified>
NKYPDAVATWLNPDPSQK	180417_07	26909	61.97	997.784	3	2991.34	947.325	11020000	HexNAcHexNeuAc2
NKYPDAVATWLNPDPSQK	180417_07	27002	62.15	997.784	3	2991.34	947.323	11020000	HexNAcHexNeuAc2
YPELFPAHQSPMFPDTR	180417_07	27242	62.63	897.068	3	2689.19	656.23	11010000	HexNAcHexNeuAc
YPELFPAHQSPMFPDTR	180417_07	27334	62.82	1345.59	3	4034.76	2001.8	-1	<not-identified>
YPELFPAHQSPMFPDTR	180417_07	27369	62.88	1345.24	3	4033.69	2000.73	-1	<not-identified>
YPELFPAHQSPMFPDTR	180417_07	27500	63.17	897.067	3	2689.19	656.229	11010000	HexNAcHexNeuAc
AVDAPDGVLPTIAPGAC(Carbamidomethyl)GGFLR	180417_07	27870	63.93	1155.86	3	3465.58	1311.48	-1	<not-identified>
VSWSGEPVGSISWSIR	180417_07	27874	63.95	988.107	3	2962.31	1215.42	-1	<not-identified>
AVDAPDGVLPTIAPGAC(Carbamidomethyl)GGFLR	180417_07	27994	64.18	1155.45	3	3464.33	1310.23	-1	<not-identified>
YPELFPAHQSPMFPDTR	180417_07	28115	64.43	994.099	3	2980.28	947.323	11020000	HexNAcHexNeuAc2
VSWSGEPVGSISWSIR	180417_07	28171	64.55	988.107	3	2962.31	1215.43	-1	<not-identified>
AVDAPDGVLPTIAPGAC(Carbamidomethyl)GGFLR	180417_07	28501	65.22	1034.15	3	3100.44	946.341	-1	<not-identified>
AVDAPDGVLPTIAPGAC(Carbamidomethyl)GGFLR	180417_07	28518	65.25	1034.48	3	3101.44	947.334	-1	<not-identified>
AVAVTLQSH	180417_07	28688	65.6	937.113	3	2809.33	1883.82	-1	<not-identified>
VWGQGQSPRPE	180417_07	28958	66.15	1203.16	3	3607.46	2366.85	-1	<not-identified>
VWGQGQSPRPE	180417_07	28986	66.22	1197.48	3	3590.42	2349.81	-1	<not-identified>
VWGQGQSPRPE	180417_07	29128	66.48	1203.49	3	3608.45	2367.85	-1	<not-identified>
VWGQGQSPRPE	180417_07	29274	66.77	1197.48	3	3590.42	2349.81	-1	<not-identified>
VWGQGQSPRPE	180417_07	29362	66.93	1197.5	3	3590.47	2349.86	-1	<not-identified>
TVTWPDMELPLPR	180417_07	33718	76.03	956.423	3	2867.26	1312.46	22020000	HexNAc2Hex2NeuAc2
AVAVTLQSH	180417_08	115	0.45	936.921	2	1872.83	947.324	11020000	HexNAcHexNeuAc2
DFTAAFPR	180417_08	115	0.45	936.921	2	1872.83	948.377	-1	<not-identified>
AVAVTLQSH	180417_08	950	3.63	936.923	2	1872.84	947.329	11020000	HexNAcHexNeuAc2
VATTVISK	180417_08	5154	20.17	1211.53	2	2422.05	1603.56	22030000	HexNAc2Hex2NeuAc3
VATTVISK	180417_08	5177	20.25	809.857	2	1618.71	800.209	-1	<not-identified>
VATTVISK	180417_08	5254	20.52	809.858	2	1618.71	800.211	-1	<not-identified>
VATTVISK	180417_08	5288	20.63	1211.45	2	2421.89	1603.4	-1	<not-identified>
VATTVISK	180417_08	5301	20.68	1211.53	2	2422.05	1603.56	22030000	HexNAc2Hex2NeuAc3
VATTVISK	180417_08	5461	21.23	1065.98	2	2130.95	1312.46	22020000	HexNAc2Hex2NeuAc2
VATTVISK	180417_08	5470	21.27	1248.55	2	2496.1	1677.6	33020000	HexNAc3Hex3NeuAc2
VATTVISK	180417_08	5539	21.52	839.407	2	1677.81	859.309	21010000	HexNAc2HexNeuAc
VATTVISK	180417_08	5553	21.57	920.434	2	1839.86	1021.36	22010000	HexNAc2Hex2NeuAc
VATTVISK	180417_08	5557	21.58	931.423	2	1861.84	1043.34	-1	<not-identified>
VATTVISK	180417_08	5614	21.73	1550.58	2	3100.15	2281.65	-1	<not-identified>
VATTVISK	180417_08	5624	21.77	1065.99	2	2130.96	1312.47	22020000	HexNAc2Hex2NeuAc2
VATTVISK	180417_08	5627	21.77	1076.97	2	2152.94	1334.44	22020010	HexNAc2Hex2NeuAc2Na
ATAPTAQAPR	180417_08	5756	22.15	1148.51	2	2296	1312.48	-1	<not-identified>
VATTVISK	180417_08	5799	22.28	1076.97	2	2152.93	1334.43	22020010	HexNAc2Hex2NeuAc2Na
VATTVISK	180417_08	5802	22.28	1065.98	2	2130.96	1312.46	22020000	HexNAc2Hex2NeuAc2
VATTVISK	180417_08	5970	22.8	1065.98	2	2130.96	1312.46	22020000	HexNAc2Hex2NeuAc2
KAPPPSGASQTIK	180417_08	6002	22.9	969.475	2	1937.94	656.227	11010000	HexNAcHexNeuAc
KAPPPSGASQTIK	180417_08	6165	23.4	969.477	2	1937.95	656.23	11010000	HexNAcHexNeuAc
DNENKKPTAIPK	180417_08	6176	23.45	1151.53	2	2302.06	947.326	11020000	HexNAcHexNeuAc2
DNENKKPTAIPK	180417_08	6184	23.47	1150.46	2	2299.91	945.177	-1	<not-identified>
DNENKKPTAIPK	180417_08	6192	23.5	1151.43	2	2301.85	947.118	-1	<not-identified>
VATTVISK	180417_08	6253	23.67	1065.98	2	2130.96	1312.46	22020000	HexNAc2Hex2NeuAc2
EDQTSPAPGLR	180417_08	6323	23.88	913.903	2	1826.8	656.224	11010000	HexNAcHexNeuAc
DNENKKPTAIPK	180417_08	6327	23.88	1151.45	2	2301.89	947.157	-1	<not-identified>
VATTVISK	180417_08	6331	23.9	1139.01	2	2277.01	1458.51	22120000	HexNAc2Hex2FucNeuAc2
VATTVISK	180417_08	6338	23.92	1065.43	2	2129.86	1311.36	-1	<not-identified>
KAPPPSGASQTIK	180417_08	6342	23.93	969.477	2	1937.95	656.231	11010000	HexNAcHexNeuAc
SALQPSPTHSSSNTQR	180417_08	6423	24.15	1177.53	2	2354.06	656.238	-1	<not-identified>
VATTVISK	180417_08	6475	24.3	1065.98	2	2130.96	1312.46	22020000	HexNAc2Hex2NeuAc2
VATTVISK	180417_08	6479	24.3	1065.46	2	2129.91	1311.41	-1	<not-identified>
VATTVISK	180417_08	6500	24.37	883.416	2	1765.82	947.326	11020000	HexNAcHexNeuAc2
EDQTSPAPGLR	180417_08	6510	24.38	913.905	2	1826.8	656.227	11010000	HexNAcHexNeuAc
VATTVISK	180417_08	6625	24.7	1105.96	2	2210.92	1392.42	22020100	HexNAc2Hex2NeuAc2Sulph
VATTVISK	180417_08	6629	24.72	920.434	2	1839.86	1021.36	22010000	HexNAc2Hex2NeuAc
VATTVISK	180417_08	6651	24.77	839.407	2	1677.81	859.308	21010000	HexNAc2HexNeuAc
VATTVISK	180417_08	6661	24.8	1065.98	2	2130.96	1312.46	22020000	HexNAc2Hex2NeuAc2
VATTVISK	180417_08	6683	24.85	1168.46	2	2335.91	1517.41	-1	<not-identified>
VATTVISK	180417_08	6694	24.88	1074.5	2	2147.99	1329.49	-1	<not-identified>
VATTVISK	180417_08	6816	25.22	920.435	2	1839.86	1021.36	22010000	HexNAc2Hex2NeuAc
VATTVISK	180417_08	6846	25.3	1065.98	2	2130.96	1312.46	22020000	HexNAc2Hex2NeuAc2
VATTVISK	180417_08	6988	25.73	737.867	2	1474.73	656.229	11010000	HexNAcHexNeuAc
VATTVISK	180417_08	7014	25.82	748.858	2	1496.71	678.21	11010010	HexNAcHexNeuAcNa
VATTVISK	180417_08	7018	25.82	1065.98	2	2130.95	1312.46	22020000	HexNAc2Hex2NeuAc2
VATTVISK	180417_08	7131	26.15	883.415	2	1765.82	947.325	11020000	HexNAcHexNeuAc2
VATTVISK	180417_08	7165	26.25	737.867	2	1474.73	656.229	11010000	HexNAcHexNeuAc
VATTVISK	180417_08	7173	26.27	894.406	2	1787.8	969.306	11020010	HexNAcHexNeuAc2Na
VATTVISK	180417_08	7198	26.33	748.858	2	1496.71	678.211	11010010	HexNAcHexNeuAcNa
VATTVISK	180417_08	7207	26.37	1474.72	2	2948.44	2129.94	-1	<not-identified>
REDQTSPAPGLR	180417_08	7232	26.42	991.956	2	1982.9	656.228	11010000	HexNAcHexNeuAc
VATTVISK	180417_08	7264	26.52	1065.98	2	2130.96	1312.46	22020000	HexNAc2Hex2NeuAc2
VATTVISK	180417_08	7314	26.65	883.416	2	1765.82	947.326	11020000	HexNAcHexNeuAc2
VATTVISK	180417_08	7352	26.77	737.867	2	1474.73	656.229	11010000	HexNAcHexNeuAc
VATTVISK	180417_08	7361	26.8	894.406	2	1787.8	969.306	11020010	HexNAcHexNeuAc2Na
VATTVISK	180417_08	7380	26.85	748.858	2	1496.71	678.211	11010010	HexNAcHexNeuAcNa
REDQTSPAPGLR	180417_08	7418	26.95	991.957	2	1982.91	656.23	11010000	HexNAcHexNeuAc
ESTPPPHVMR	180417_08	7437	27	903.903	2	1806.8	656.23	11010000	HexNAcHexNeuAc
VATTVISK	180417_08	7492	27.17	883.417	2	1765.83	947.329	11020000	HexNAcHexNeuAc2
VATTVISK	180417_08	7538	27.3	737.868	2	1474.73	656.23	11010000	HexNAcHexNeuAc
VATTVISK	180417_08	7547	27.33	894.408	2	1787.81	969.311	11020010	HexNAcHexNeuAc2Na
VATTVISK	180417_08	7563	27.37	748.857	2	1496.71	678.208	11010010	HexNAcHexNeuAcNa
VATTVISK	180417_08	7609	27.5	748.3	2	1495.59	677.095	-1	<not-identified>
REDQTSPAPGLR	180417_08	7620	27.53	846.408	2	1691.81	365.132	11000000	HexNAcHex
ESTPPPHVMR	180417_08	7624	27.55	903.904	2	1806.8	656.233	11010000	HexNAcHexNeuAc
REDQTSPAPGLR	180417_08	7672	27.68	661.792	2	1322.58	-4.09882	-1	<not-identified>
VATTVISK	180417_08	7686	27.73	883.417	2	1765.83	947.329	11020000	HexNAcHexNeuAc2
VATTVISK	180417_08	7725	27.83	737.867	2	1474.73	656.229	11010000	HexNAcHexNeuAc
VATTVISK	180417_08	7743	27.88	894.406	2	1787.8	969.307	11020010	HexNAcHexNeuAc2Na
REDQTSPAPGLR	180417_08	7819	28.1	759.291	2	1517.57	190.898	-1	<not-identified>
VATTVISK	180417_08	7832	28.13	737.309	2	1473.61	655.112	-1	<not-identified>
VATTVISK	180417_08	7870	28.25	883.415	2	1765.82	947.325	11020000	HexNAcHexNeuAc2
DANISQPETTKEGLR	180417_08	7884	28.3	868.333	2	1735.66	76.8246	-1	<not-identified>
VATTVISK	180417_08	7899	28.33	711.312	2	1421.62	603.117	-1	<not-identified>
DANISQPETTKEGLR	180417_08	7911	28.37	868.83	2	1736.65	77.8182	-1	<not-identified>
VATTVISK	180417_08	7912	28.37	737.866	2	1474.73	656.227	11010000	HexNAcHexNeuAc
VATTVISK	180417_08	8014	28.67	1065.98	2	2130.96	1312.46	22020000	HexNAc2Hex2NeuAc2
REDQTSPAPGLR	180417_08	8019	28.68	765.384	2	1529.76	203.085	-1	<not-identified>
VATTVISK	180417_08	8085	28.88	737.868	2	1474.73	656.23	11010000	HexNAcHexNeuAc
AVAVTLQSH	180417_08	8195	29.18	772.823	2	1544.64	619.129	-1	<not-identified>
REDQTSPAPGLR	180417_08	8198	29.2	765.382	2	1529.76	203.08	10000000	HexNAc
LETPAPQVPAR	180417_08	8226	29.28	1063.49	2	2125.98	947.327	11020000	HexNAcHexNeuAc2
AVAVTLQSH	180417_08	8246	29.33	892.784	2	1784.56	859.05	-1	<not-identified>
AVAVTLQSH	180417_08	8277	29.43	1192.52	2	2384.03	1458.52	22120000	HexNAc2Hex2FucNeuAc2
VATTVISK	180417_08	8304	29.5	737.868	2	1474.73	656.231	11010000	HexNAcHexNeuAc
AVAVTLQSH	180417_08	8323	29.55	791.373	2	1581.74	656.228	11010000	HexNAcHexNeuAc
AVAVTLQSH	180417_08	8327	29.57	965.942	2	1930.88	1005.37	-1	<not-identified>
AVAVTLQSH	180417_08	8335	29.58	1046.97	2	2092.94	1167.42	22110000	HexNAc2Hex2FucNeuAc
AVAVTLQSH	180417_08	8355	29.63	892.911	2	1784.81	859.305	21010000	HexNAc2HexNeuAc
EDQTSPAPGLR	180417_08	8363	29.67	930.403	2	1859.8	689.224	-1	<not-identified>
AVAVTLQSH	180417_08	8371	29.68	966.444	2	1931.88	1006.37	-1	<not-identified>
REDQTSPAPGLR	180417_08	8383	29.72	765.382	2	1529.76	203.08	10000000	HexNAc
AVAVTLQSH	180417_08	8384	29.72	973.94	2	1946.87	1021.36	22010000	HexNAc2Hex2NeuAc
LETPAPQVPAR	180417_08	8411	29.8	1063.49	2	2125.98	947.327	11020000	HexNAcHexNeuAc2
RGPATPGPSYR	180417_08	8424	29.83	612.183	2	1223.36	64.7577	-1	<not-identified>
AVAVTLQSH	180417_08	8442	29.88	791.418	2	1581.83	656.318	-1	<not-identified>
EDQTSPAPGLR	180417_08	8461	29.95	930.412	2	1859.82	689.243	-1	<not-identified>
AVAVTLQSH	180417_08	8464	29.95	1192.52	2	2384.03	1458.52	22120000	HexNAc2Hex2FucNeuAc2
REDQTSPAPGLR	180417_08	8482	30	846.408	2	1691.81	365.133	11000000	HexNAcHex
VWGQGQSPRPE	180417_08	8490	30.02	852.812	2	1704.62	464.01	-1	<not-identified>
VATTVISK	180417_08	8494	30.03	737.868	2	1474.73	656.23	11010000	HexNAcHexNeuAc
AVAVTLQSH	180417_08	8539	30.18	1119.49	2	2237.98	1312.47	22020000	HexNAc2Hex2NeuAc2
ESTPPPHVMR	180417_08	8550	30.2	1130.48	2	2259.95	1109.38	-1	<not-identified>
REDQTSPAPGLR	180417_08	8564	30.23	765.382	2	1529.76	203.081	10000000	HexNAc
AVAVTLQSH	180417_08	8567	30.25	783.812	2	1566.62	641.107	-1	<not-identified>
AVAVTLQSH	180417_08	8574	30.27	892.91	2	1784.81	859.303	21010000	HexNAc2HexNeuAc
AVAVTLQSH	180417_08	8581	30.28	973.944	2	1946.88	1021.37	-1	<not-identified>
AVAVTLQSH	180417_08	8590	30.32	973.399	2	1945.79	1020.28	-1	<not-identified>
AVAVTLQSH	180417_08	8603	30.35	791.377	2	1581.75	656.237	-1	<not-identified>
AVAVTLQSH	180417_08	8647	30.47	1166.99	2	2332.97	1407.46	-1	<not-identified>
AVAVTLQSH	180417_08	8670	30.53	1159.46	2	2317.92	1392.41	22020100	HexNAc2Hex2NeuAc2Sulph
VATTVISK	180417_08	8684	30.57	737.867	2	1474.73	656.228	11010000	HexNAcHexNeuAc
ESTPPPHVMR	180417_08	8691	30.58	903.902	2	1806.8	656.228	11010000	HexNAcHexNeuAc
AVAVTLQSH	180417_08	8694	30.6	1192.51	2	2384.02	1458.51	22120000	HexNAc2Hex2FucNeuAc2
VATTVISK	180417_08	8708	30.63	738.321	2	1475.64	657.137	-1	<not-identified>
AVAVTLQSH	180417_08	8712	30.63	1192.44	2	2383.86	1458.35	-1	<not-identified>
AVAVTLQSH	180417_08	8726	30.68	1193.21	2	2385.41	1459.9	-1	<not-identified>
AVAVTLQSH	180417_08	8730	30.68	1119.49	2	2237.97	1312.46	22020000	HexNAc2Hex2NeuAc2
AVAVTLQSH	180417_08	8739	30.7	772.822	2	1544.64	619.126	-1	<not-identified>
AVAVTLQSH	180417_08	8743	30.72	1130.48	2	2259.95	1334.44	22020010	HexNAc2Hex2NeuAc2Na
ESTPPPHVMR	180417_08	8743	30.72	1130.48	2	2259.95	1109.38	-1	<not-identified>
AVAVTLQSH	180417_08	8749	30.73	1082.47	2	2163.93	1238.42	11030000	HexNAcHexNeuAc3
AVAVTLQSH	180417_08	8760	30.77	772.361	2	1543.72	618.205	-1	<not-identified>
AVAVTLQSH	180417_08	8763	30.77	1170.46	2	2339.9	1414.39	22020110	HexNAc2Hex2NeuAc2SulphNa
AVAVTLQSH	180417_08	8773	30.8	1119.49	2	2237.97	1312.46	22020000	HexNAc2Hex2NeuAc2
AVAVTLQSH	180417_08	8777	30.8	892.913	2	1784.82	859.309	21010000	HexNAc2HexNeuAc
AVAVTLQSH	180417_08	8791	30.83	936.927	2	1872.85	947.337	-1	<not-identified>
AVAVTLQSH	180417_08	8819	30.92	947.912	2	1894.82	969.307	11020010	HexNAcHexNeuAc2Na
VATTVISK	180417_08	8824	30.93	883.376	2	1765.74	947.246	-1	<not-identified>
AVAVTLQSH	180417_08	8846	30.98	765.383	2	1529.76	604.248	-1	<not-identified>
REDQTSPAPGLR	180417_08	8846	30.98	765.383	2	1529.76	203.082	-1	<not-identified>
AVAVTLQSH	180417_08	8879	31.08	722.294	2	1443.58	518.071	-1	<not-identified>
AVAVTLQSH	180417_08	8900	31.13	791.375	2	1581.74	656.232	11010000	HexNAcHexNeuAc
AVAVTLQSH	180417_08	8920	31.18	1562.59	2	3124.18	2198.67	-1	<not-identified>
AVAVTLQSH	180417_08	8930	31.2	1548.59	2	3096.18	2170.67	-1	<not-identified>
AVAVTLQSH	180417_08	8931	31.22	1213.52	2	2426.03	1500.52	22121000	HexNAc2Hex2FucNeuAcNeuAcAc
AVAVTLQSH	180417_08	8943	31.25	1119.49	2	2237.97	1312.46	22020000	HexNAc2Hex2NeuAc2
AVAVTLQSH	180417_08	8947	31.25	802.363	2	1603.72	678.209	11010010	HexNAcHexNeuAcNa
AVAVTLQSH	180417_08	8955	31.28	1564.59	2	3128.17	2202.65	-1	<not-identified>
AVAVTLQSH	180417_08	8956	31.28	1542.61	2	3084.21	2158.7	-1	<not-identified>
AVAVTLQSH	180417_08	8961	31.3	710.345	2	1419.68	494.173	10010000	HexNAcNeuAc
AVAVTLQSH	180417_08	8979	31.33	1373.56	2	2746.1	1820.59	-1	<not-identified>
AVAVTLQSH	180417_08	8986	31.35	1385.54	2	2770.06	1844.55	-1	<not-identified>
AVAVTLQSH	180417_08	8988	31.35	1553.6	2	3106.19	2180.68	-1	<not-identified>
AVAVTLQSH	180417_08	8992	31.37	1103.47	2	2205.93	1280.42	11031000	HexNAcHexNeuAc2NeuAcAc
AVAVTLQSH	180417_08	8993	31.37	1449.59	2	2898.18	1972.67	-1	<not-identified>
AVAVTLQSH	180417_08	8999	31.38	936.923	2	1872.84	947.329	11020000	HexNAcHexNeuAc2
AVAVTLQSH	180417_08	9019	31.43	1457.55	2	2914.09	1988.58	-1	<not-identified>
AVAVTLQSH	180417_08	9023	31.45	905.353	2	1809.7	884.188	-1	<not-identified>
AVAVTLQSH	180417_08	9026	31.45	947.912	2	1894.82	969.306	11020010	HexNAcHexNeuAc2Na
AVAVTLQSH	180417_08	9031	31.47	1290	2	2578.99	1653.48	-1	<not-identified>
AVAVTLQSH	180417_08	9032	31.47	1570.61	2	3140.22	2214.71	-1	<not-identified>
REDQTSPAPGLR	180417_08	9053	31.52	765.382	2	1529.76	203.081	10000000	HexNAc
AVAVTLQSH	180417_08	9059	31.53	1449.55	2	2898.1	1972.59	-1	<not-identified>
AVAVTLQSH	180417_08	9070	31.57	1479.56	2	2958.12	2032.61	-1	<not-identified>
AVAVTLQSH	180417_08	9109	31.67	791.373	2	1581.74	656.229	11010000	HexNAcHexNeuAc
VWGQGQSPRPE	180417_08	9134	31.73	1094.46	2	2187.92	947.315	11020000	HexNAcHexNeuAc2
VATTVISK	180417_08	9157	31.8	737.867	2	1474.73	656.228	11010000	HexNAcHexNeuAc
AVAVTLQSH	180417_08	9160	31.8	1192.45	2	2383.89	1458.38	-1	<not-identified>
AVAVTLQSH	180417_08	9196	31.9	1119.49	2	2237.98	1312.47	22020000	HexNAc2Hex2NeuAc2
AVAVTLQSH	180417_08	9200	31.92	936.921	2	1872.84	947.325	11020000	HexNAcHexNeuAc2
AVAVTLQSH	180417_08	9220	31.97	947.912	2	1894.82	969.307	11020010	HexNAcHexNeuAc2Na
AVAVTLQSH	180417_08	9313	32.2	1120.43	2	2239.84	1314.33	-1	<not-identified>
VWGQGQSPRPE	180417_08	9337	32.25	1094.47	2	2187.94	947.33	11020000	HexNAcHexNeuAc2
VATTVISK	180417_08	9377	32.35	883.871	2	1766.73	948.236	-1	<not-identified>
AVAVTLQSH	180417_08	9391	32.38	1140.49	2	2279.98	1354.47	22021000	HexNAc2Hex2NeuAcNeuAcAc
AVAVTLQSH	180417_08	9412	32.43	936.921	2	1872.84	947.325	11020000	HexNAcHexNeuAc2
AVAVTLQSH	180417_08	9473	32.58	1119.49	2	2237.97	1312.46	22020000	HexNAc2Hex2NeuAc2
VATTVISK	180417_08	9476	32.58	883.37	2	1765.73	947.234	-1	<not-identified>
AVAVTLQSH	180417_08	9489	32.62	1103.48	2	2205.95	1280.44	-1	<not-identified>
AVAVTLQSH	180417_08	9502	32.67	1114.48	2	2227.95	1302.44	-1	<not-identified>
AVAVTLQSH	180417_08	9535	32.73	791.373	2	1581.74	656.229	11010000	HexNAcHexNeuAc
AVAVTLQSH	180417_08	9557	32.8	1114.47	2	2227.93	1302.42	11031010	HexNAcHexNeuAc2NeuAcAcNa
AVAVTLQSH	180417_08	9587	32.87	1140.49	2	2279.98	1354.47	22021000	HexNAc2Hex2NeuAcNeuAcAc
AVAVTLQSH	180417_08	9616	32.95	936.923	2	1872.84	947.329	11020000	HexNAcHexNeuAc2
AVAVTLQSH	180417_08	9638	33.02	947.912	2	1894.82	969.307	11020010	HexNAcHexNeuAc2Na
AVAVTLQSH	180417_08	9662	33.07	1139.99	2	2278.97	1353.46	-1	<not-identified>
AVAVTLQSH	180417_08	9685	33.13	791.417	2	1581.83	656.316	-1	<not-identified>
AVAVTLQSH	180417_08	9696	33.15	1103.47	2	2205.94	1280.43	11031000	HexNAcHexNeuAc2NeuAcAc
AVAVTLQSH	180417_08	9727	33.23	936.387	2	1871.77	946.257	-1	<not-identified>
AVAVTLQSH	180417_08	9761	33.32	1286.04	2	2571.08	1645.57	22031000	HexNAc2Hex2NeuAc2NeuAcAc
AVAVTLQSH	180417_08	9774	33.35	973.94	2	1946.87	1021.36	22010000	HexNAc2Hex2NeuAc
AVAVTLQSH	180417_08	9787	33.37	1297.03	2	2593.04	1667.53	-1	<not-identified>
AVAVTLQSH	180417_08	9795	33.38	1140.49	2	2279.97	1354.46	22021000	HexNAc2Hex2NeuAcNeuAcAc
AVAVTLQSH	180417_08	9821	33.45	766.289	2	1531.57	606.06	-1	<not-identified>
AVAVTLQSH	180417_08	9830	33.48	936.93	2	1872.85	947.343	-1	<not-identified>
AVAVTLQSH	180417_08	9838	33.5	1296.52	2	2592.03	1666.52	-1	<not-identified>
VWGQGQSPRPE	180417_08	9873	33.58	947.913	2	1894.82	654.211	-1	<not-identified>
DALPDNENKKPTAIPK	180417_08	9877	33.58	1349.64	2	2698.28	947.348	-1	<not-identified>
AVAVTLQSH	180417_08	9878	33.6	957.925	2	1914.84	989.333	11021000	HexNAcHexNeuAcNeuAcAc
DALPDNENKKPTAIPK	180417_08	9907	33.67	1349.63	2	2698.25	947.321	11020000	HexNAcHexNeuAc2
AVAVTLQSH	180417_08	9910	33.68	968.917	2	1936.83	1011.32	11021010	HexNAcHexNeuAcNeuAcAcNa
AVAVTLQSH	180417_08	9934	33.73	957.926	2	1914.84	989.334	11021000	HexNAcHexNeuAcNeuAcAc
AVAVTLQSH	180417_08	10054	34.05	746.841	2	1492.68	567.165	-1	<not-identified>
AVAVTLQSH	180417_08	10086	34.13	947.913	2	1894.82	969.309	11020010	HexNAcHexNeuAc2Na
AVAVTLQSH	180417_08	10105	34.18	936.925	2	1872.84	947.334	-1	<not-identified>
AVAVTLQSH	180417_08	10109	34.18	968.917	2	1936.83	1011.32	11021010	HexNAcHexNeuAcNeuAcAcNa
AVAVTLQSH	180417_08	10117	34.22	791.37	2	1581.73	656.222	11010000	HexNAcHexNeuAc
AVAVTLQSH	180417_08	10131	34.25	812.374	2	1623.74	698.231	-1	<not-identified>
AVAVTLQSH	180417_08	10139	34.27	957.927	2	1914.85	989.336	11021000	HexNAcHexNeuAcNeuAcAc
AVAVTLQSH	180417_08	10307	34.7	936.921	2	1872.84	947.325	11020000	HexNAcHexNeuAc2
AVAVTLQSH	180417_08	10344	34.8	957.926	2	1914.85	989.335	11021000	HexNAcHexNeuAcNeuAcAc
LEGLLESPSPGTSWTTR	180417_08	10351	34.82	926.395	2	1851.78	20.8598	-1	<not-identified>
AVAVTLQSH	180417_08	10403	34.95	937.377	2	1873.75	948.236	-1	<not-identified>
LQAAGLPHTEVPQGK	180417_08	10451	35.07	831.361	2	1661.71	115.876	-1	<not-identified>
AVAVTLQSH	180417_08	10475	35.13	958.431	2	1915.85	990.344	-1	<not-identified>
ESTPPPHVMR	180417_08	10521	35.27	1078.47	2	2155.93	1005.36	-1	<not-identified>
AVAVTLQSH	180417_08	10561	35.37	957.927	2	1914.85	989.337	11021000	HexNAcHexNeuAcNeuAcAc
HLVTTVPKDPEAAE	180417_08	10593	35.45	1227.56	2	2454.11	947.334	-1	<not-identified>
AVAVTLQSH	180417_08	10605	35.47	937.381	2	1873.75	948.245	-1	<not-identified>
AVAVTLQSH	180417_08	10645	35.57	938.388	2	1875.77	950.259	-1	<not-identified>
AVAVTLQSH	180417_08	10672	35.65	957.406	2	1913.81	988.295	-1	<not-identified>
AVAVTLQSH	180417_08	10693	35.7	937.426	2	1873.85	948.335	-1	<not-identified>
AVAVTLQSH	180417_08	10703	35.72	947.914	2	1894.82	969.311	11020010	HexNAcHexNeuAc2Na
AVAVTLQSH	180417_08	10731	35.8	812.386	2	1623.76	698.254	-1	<not-identified>
AVAVTLQSH	180417_08	10741	35.83	978.932	2	1956.86	1031.35	11022000	HexNAcHexNeuAcAc2
ESTPPPHVMR	180417_08	10774	35.92	822.371	2	1643.73	493.167	-1	<not-identified>
AVAVTLQSH	180417_08	10777	35.92	811.886	2	1622.77	697.255	20010000	HexNAc2NeuAc
AVAVTLQSH	180417_08	10781	35.93	1135.47	2	2269.94	1344.43	11032010	HexNAcHexNeuAcNeuAcAc2Na
ESTPPPHVMR	180417_08	10806	36	822.88	2	1644.75	494.186	-1	<not-identified>
AVAVTLQSH	180417_08	10869	36.17	1124.47	2	2247.93	1322.42	-1	<not-identified>
GQQGQGPWGTGGTPHGPR	180417_08	11125	36.8	1360.57	2	2720.12	945.286	-1	<not-identified>
GQQGQGPWGTGGTPHGPR	180417_08	11333	37.32	1362.53	2	2724.05	949.213	-1	<not-identified>
VEDLHVGATVAPSSR	180417_08	11412	37.5	1097.51	2	2194.02	656.224	11010000	HexNAcHexNeuAc
HLVTTVPKDPEAAE	180417_08	11519	37.77	1080.94	2	2160.88	654.099	-1	<not-identified>
VEDLHVGATVAPSSR	180417_08	11626	38.05	972.429	2	1943.85	406.054	-1	<not-identified>
DWVAPGPSTGSGR	180417_08	11697	38.23	971.927	2	1942.85	656.234	11010000	HexNAcHexNeuAc
DWVAPGPSTGSGR	180417_08	11823	38.55	971.917	2	1942.83	656.214	-1	<not-identified>
AVAVTLQSH	180417_08	12089	39.23	1140.5	2	2279.99	1354.48	-1	<not-identified>
AVAVTLQSH	180417_08	12301	39.73	957.927	2	1914.85	989.336	11021000	HexNAcHexNeuAcNeuAcAc
AVAVTLQSH	180417_08	12322	39.78	957.926	2	1914.85	989.335	11021000	HexNAcHexNeuAcNeuAcAc
AQGSQVLESTPPPHVMR	180417_08	12339	39.83	1391.14	2	2781.27	947.339	-1	<not-identified>
AVAVTLQSH	180417_08	12382	39.93	968.916	2	1936.82	1011.31	11021010	HexNAcHexNeuAcNeuAcAcNa
AVAVTLQSH	180417_08	12458	40.1	1515.59	2	3030.17	2104.66	-1	<not-identified>
AVAVTLQSH	180417_08	12464	40.12	710.345	2	1419.68	494.173	10010000	HexNAcNeuAc
VWGQGQSPRPENSLER	180417_08	12469	40.13	1394.13	2	2787.26	947.35	-1	<not-identified>
AVAVTLQSH	180417_08	12472	40.13	1187.01	2	2373.01	1447.5	-1	<not-identified>
AVAVTLQSH	180417_08	12482	40.17	1521.61	2	3042.21	2116.7	-1	<not-identified>
AVAVTLQSH	180417_08	12489	40.18	1141.5	2	2282	1356.49	-1	<not-identified>
AVAVTLQSH	180417_08	12496	40.2	1506.6	2	3012.19	2086.68	-1	<not-identified>
AVAVTLQSH	180417_08	12497	40.2	1187.02	2	2373.02	1447.51	-1	<not-identified>
AVAVTLQSH	180417_08	12514	40.23	1457.59	2	2914.17	1988.66	-1	<not-identified>
AVAVTLQSH	180417_08	12522	40.27	1523.6	2	3046.19	2120.68	-1	<not-identified>
AVAVTLQSH	180417_08	12523	40.27	1562.65	2	3124.28	2198.77	-1	<not-identified>
AVAVTLQSH	180417_08	12544	40.32	1447.6	2	2894.2	1968.69	33030000	HexNAc3Hex3NeuAc3
AVAVTLQSH	180417_08	12545	40.32	1488.62	2	2976.24	2050.73	-1	<not-identified>
VWGQGQSPRPENSLER	180417_08	12546	40.32	1027.44	2	2053.87	213.957	-1	<not-identified>
AVAVTLQSH	180417_08	12551	40.32	957.926	2	1914.84	989.334	11021000	HexNAcHexNeuAcNeuAcAc
AVAVTLQSH	180417_08	12557	40.33	1497.61	2	2994.22	2068.71	-1	<not-identified>
AVAVTLQSH	180417_08	12572	40.37	1551.63	2	3102.25	2176.74	-1	<not-identified>
AVAVTLQSH	180417_08	12605	40.45	1323.53	2	2646.05	1720.54	-1	<not-identified>
AVAVTLQSH	180417_08	12616	40.48	968.917	2	1936.83	1011.32	11021010	HexNAcHexNeuAcNeuAcAcNa
AVAVTLQSH	180417_08	12642	40.53	1142.51	2	2284.01	1358.5	-1	<not-identified>
AVAVTLQSH	180417_08	12645	40.55	1102.99	2	2204.97	1279.46	-1	<not-identified>
VWGQGQSPRPENSLER	180417_08	12651	40.57	1394.53	2	2788.06	948.151	-1	<not-identified>
AVAVTLQSH	180417_08	12713	40.72	997.911	2	1994.82	1069.31	-1	<not-identified>
AVAVTLQSH	180417_08	12723	40.73	997.908	2	1994.81	1069.3	-1	<not-identified>
AVAVTLQSH	180417_08	12780	40.87	957.926	2	1914.85	989.335	11021000	HexNAcHexNeuAcNeuAcAc
AVAVTLQSH	180417_08	12835	41	968.918	2	1936.83	1011.32	11021010	HexNAcHexNeuAcNeuAcAcNa
AVAVTLQSH	180417_08	12998	41.38	957.927	2	1914.85	989.337	11021000	HexNAcHexNeuAcNeuAcAc
AVAVTLQSH	180417_08	13076	41.6	978.933	2	1956.86	1031.35	11022000	HexNAcHexNeuAcAc2
AVAVTLQSH	180417_08	13086	41.62	989.426	2	1977.85	1052.34	-1	<not-identified>
AVAVTLQSH	180417_08	13095	41.65	989.925	2	1978.84	1053.33	-1	<not-identified>
WTHSYL	180417_08	13096	41.65	833.345	2	1665.68	859.299	21010000	HexNAc2HexNeuAc
AVAVTLQSH	180417_08	13107	41.67	1135.48	2	2269.94	1344.43	11032010	HexNAcHexNeuAcNeuAcAc2Na
AVAVTLQSH	180417_08	13159	41.8	1124.48	2	2247.96	1322.45	11032000	HexNAcHexNeuAcNeuAcAc2
AVAVTLQSH	180417_08	13216	41.93	957.926	2	1914.84	989.334	11021000	HexNAcHexNeuAcNeuAcAc
AVAVTLQSH	180417_08	13222	41.95	1308.56	2	2616.1	1690.59	-1	<not-identified>
AVAVTLQSH	180417_08	13300	42.12	1305.02	2	2609.02	1683.51	-1	<not-identified>
AVAVTLQSH	180417_08	13335	42.22	1135.47	2	2269.93	1344.42	11032010	HexNAcHexNeuAcNeuAcAc2Na
VWGQGQSPRPENSLER	180417_08	13352	42.25	1040.47	2	2079.93	240.021	-1	<not-identified>
AVAVTLQSH	180417_08	13387	42.33	1124.48	2	2247.96	1322.45	11032000	HexNAcHexNeuAcNeuAcAc2
GNFLTGLGHR	180417_08	13437	42.43	1010.5	2	2019.99	948.424	-1	<not-identified>
AVAVTLQSH	180417_08	13456	42.48	1145.48	2	2289.96	1364.45	11033000	HexNAcHexNeuAcNeuAcAcNeuAcAcAc
AVAVTLQSH	180417_08	13502	42.6	1156.47	2	2311.93	1386.42	-1	<not-identified>
VWGQGQSPRPENSLER	180417_08	13668	42.98	929.374	2	1857.74	17.8313	-1	<not-identified>
WTHSYL	180417_08	13732	43.15	752.348	2	1503.69	697.305	-1	<not-identified>
WTHSYL	180417_08	13753	43.2	752.322	2	1503.64	697.253	20010000	HexNAc2NeuAc
AVAVTLQSH	180417_08	13770	43.23	999.937	2	1998.87	1073.36	-1	<not-identified>
WTHSYL	180417_08	13776	43.25	877.355	2	1753.7	947.319	11020000	HexNAcHexNeuAc2
WTHSYL	180417_08	13786	43.28	606.775	2	1212.54	406.159	20000000	HexNAc2
AVAVTLQSH	180417_08	13819	43.37	957.924	2	1914.84	989.33	11021000	HexNAcHexNeuAcNeuAcAc
AVAVTLQSH	180417_08	13823	43.38	1000.44	2	1999.88	1074.37	-1	<not-identified>
WTHSYL	180417_08	13850	43.43	1535.63	2	3070.25	2263.86	-1	<not-identified>
WTHSYL	180417_08	13863	43.47	888.347	2	1775.69	969.303	11020010	HexNAcHexNeuAc2Na
WTHSYL	180417_08	13869	43.48	1547.12	2	3093.23	2286.84	-1	<not-identified>
WTHSYL	180417_08	13890	43.53	1022.91	2	2044.81	1238.42	11030000	HexNAcHexNeuAc3
WTHSYL	180417_08	13914	43.58	1450.59	2	2900.18	2093.8	-1	<not-identified>
AVAVTLQSH	180417_08	13928	43.62	958.431	2	1915.85	990.344	-1	<not-identified>
WTHSYL	180417_08	13938	43.65	731.808	2	1462.61	656.226	11010000	HexNAcHexNeuAc
WTHSYL	180417_08	13952	43.68	1496.6	2	2992.19	2185.81	-1	<not-identified>
WTHSYL	180417_08	13953	43.68	1468.58	2	2936.15	2129.77	-1	<not-identified>
WTHSYL	180417_08	13958	43.68	1445.6	2	2890.19	2083.81	-1	<not-identified>
WTHSYL	180417_08	13971	43.72	752.322	2	1503.64	697.253	20010000	HexNAc2NeuAc
WTHSYL	180417_08	13976	43.73	1462.6	2	2924.2	2117.82	-1	<not-identified>
WTHSYL	180417_08	13984	43.75	1569.62	2	3138.24	2331.85	-1	<not-identified>
WTHSYL	180417_08	14006	43.8	877.357	2	1753.71	947.325	11020000	HexNAcHexNeuAc2
WTHSYL	180417_08	14007	43.8	606.775	2	1212.54	406.159	20000000	HexNAc2
WTHSYL	180417_08	14024	43.83	1511.1	2	3021.19	2214.81	-1	<not-identified>
SDALPDNENKKPTAIPK	180417_08	14029	43.85	1247.1	2	2493.2	655.234	-1	<not-identified>
SDALPDNENKKPTAIPK	180417_08	14030	43.85	747.837	2	1494.67	-343.299	-1	<not-identified>
SLTVSLGPVSK	180417_08	14051	43.9	806.378	2	1611.75	524.112	-1	<not-identified>
DLSDALPDNENKKPTAIPK	180417_08	14057	43.92	1506.63	2	3012.25	946.172	-1	<not-identified>
WTHSYL	180417_08	14057	43.92	1506.63	2	3012.25	2205.87	-1	<not-identified>
EEMGPVPAHTDAF	180417_08	14058	43.92	1174.97	2	2348.93	948.318	-1	<not-identified>
DLSDALPDNENKKPTAIPK	180417_08	14069	43.95	1507.7	2	3014.4	948.32	-1	<not-identified>
DFTAAFPR	180417_08	14088	43.98	1046.43	2	2091.86	1167.4	-1	<not-identified>
WTHSYL	180417_08	14094	44	888.348	2	1775.69	969.305	11020010	HexNAcHexNeuAc2Na
EEMGPVPAHTDAF	180417_08	14100	44.02	1174.46	2	2347.92	947.306	-1	<not-identified>
WTHSYL	180417_08	14127	44.07	1463.62	2	2926.23	2119.84	-1	<not-identified>
SLTVSLGPVSK	180417_08	14131	44.08	1209.06	2	2417.11	1329.48	23110000	HexNAc2Hex3FucNeuAc
GNFLTGLGHR	180417_08	14149	44.13	864.897	2	1728.79	657.218	-1	<not-identified>
ALSPQQVTRLPSGY	180417_08	14152	44.13	1415.14	2	2829.27	1312.46	22020000	HexNAc2Hex2NeuAc2
WTHSYL	180417_08	14158	44.15	751.784	2	1502.56	696.177	-1	<not-identified>
WTHSYL	180417_08	14160	44.15	1301.53	2	2602.05	1795.67	-1	<not-identified>
GNFLTGLGHR	180417_08	14185	44.2	1009.46	2	2017.92	946.349	-1	<not-identified>
EEMGPVPAHTDAF	180417_08	14186	44.2	1174.49	2	2347.97	947.358	-1	<not-identified>
SLTVSLGPVSK	180417_08	14217	44.27	1229.58	2	2458.15	1370.52	-1	<not-identified>
WTHSYL	180417_08	14254	44.37	877.358	2	1753.71	947.326	11020000	HexNAcHexNeuAc2
WTHSYL	180417_08	14255	44.37	606.775	2	1212.54	406.159	20000000	HexNAc2
RDFTAAFPR	180417_08	14261	44.38	1014.45	2	2027.89	947.328	11020000	HexNAcHexNeuAc2
DFTAAFPR	180417_08	14268	44.4	1302.53	2	2604.06	1679.6	-1	<not-identified>
SQGNINNPTPGPVPVPGPK	180417_08	14285	44.43	964.417	2	1927.83	57.8449	-1	<not-identified>
AQDGGPVGTELFR	180417_08	14302	44.48	906.903	2	1812.8	466.128	-1	<not-identified>
SDALPDNENKKPTAIPK	180417_08	14332	44.55	1393.16	2	2785.3	947.337	-1	<not-identified>
SDALPDNENKKPTAIPK	180417_08	14341	44.57	1392.66	2	2784.32	946.355	-1	<not-identified>
DFTAAFPR	180417_08	14369	44.62	801.333	2	1601.66	677.201	-1	<not-identified>
SDALPDNENKKPTAIPK	180417_08	14382	44.65	1248.48	2	2495.94	657.978	-1	<not-identified>
DFTAAFPR	180417_08	14391	44.68	1301.52	2	2602.04	1677.58	33020000	HexNAc3Hex3NeuAc2
DFTAAFPR	180417_08	14419	44.75	770.282	2	1539.56	615.098	-1	<not-identified>
WTHSYL	180417_08	14423	44.77	646.753	2	1292.5	486.115	-1	<not-identified>
SDALPDNENKKPTAIPK	180417_08	14435	44.8	1392.66	2	2784.3	946.337	-1	<not-identified>
WTHSYL	180417_08	14463	44.87	1211.55	2	2422.09	1615.71	-1	<not-identified>
WTHSYL	180417_08	14479	44.9	877.354	2	1753.7	947.317	11020000	HexNAcHexNeuAc2
ALSPQQVTRLPSGY	180417_08	14497	44.95	1232.57	2	2464.14	947.326	11020000	HexNAcHexNeuAc2
DFTAAFPR	180417_08	14501	44.95	973.412	2	1945.82	1021.36	22010000	HexNAc2Hex2NeuAc
DKEC(Carbamidomethyl)TEC(Carbamidomethyl)DPLPNPSLTAR	180417_08	14550	45.07	1525.59	2	3050.18	947.231	-1	<not-identified>
SDALPDNENKKPTAIPK	180417_08	14587	45.18	1393.14	2	2785.28	947.314	11020000	HexNAcHexNeuAc2
VATTVISK	180417_08	14588	45.18	737.329	2	1473.65	655.153	-1	<not-identified>
WTHSYL	180417_08	14615	45.25	877.859	2	1754.71	948.328	-1	<not-identified>
WTHSYL	180417_08	14636	45.3	646.753	2	1292.5	486.116	-1	<not-identified>
ALSPQQVTRLPSGY	180417_08	14643	45.32	1006	2	2010.99	494.174	10010000	HexNAcNeuAc
ALSPQQVTRLPSGY	180417_08	14713	45.5	1232.57	2	2464.14	947.324	11020000	HexNAcHexNeuAc2
DFTAAFPR	180417_08	14717	45.5	973.413	2	1945.82	1021.36	22010000	HexNAc2Hex2NeuAc
DKEC(Carbamidomethyl)TEC(Carbamidomethyl)DPLPNPSLTAR	180417_08	14718	45.5	1380.09	2	2759.17	656.219	-1	<not-identified>
GNFLTGLGHR	180417_08	14736	45.55	739.367	2	1477.73	406.157	20000000	HexNAc2
AQDGGPVGTELFR	180417_08	14750	45.57	1331.07	2	2661.14	1314.47	-1	<not-identified>
ALSPQQVTRLPSGY	180417_08	14841	45.77	961.988	2	1922.97	406.157	20000000	HexNAc2
AQDGGPVGTELFR	180417_08	14872	45.83	892.888	2	1784.77	438.1	-1	<not-identified>
DFTAAFPR	180417_08	14872	45.83	892.888	2	1784.77	860.312	-1	<not-identified>
DFTAAFPR	180417_08	14875	45.85	1119.96	2	2238.92	1314.46	-1	<not-identified>
ALSPQQVTRLPSGY	180417_08	14907	45.95	962.49	2	1923.97	407.161	-1	<not-identified>
KAPPPSGASQTIK	180417_08	14907	45.95	962.49	2	1923.97	642.257	-1	<not-identified>
AQDGGPVGTELFR	180417_08	14939	46.02	887.388	2	1773.77	427.099	-1	<not-identified>
DFTAAFPR	180417_08	14939	46.02	887.388	2	1773.77	849.311	-1	<not-identified>
DFTAAFPR	180417_08	14944	46.03	1118.96	2	2236.91	1312.46	22020000	HexNAc2Hex2NeuAc2
DFTAAFPR	180417_08	14953	46.05	892.384	2	1783.76	859.303	21010000	HexNAc2HexNeuAc
DFTAAFPR	180417_08	14994	46.13	973.41	2	1945.81	1021.35	22010000	HexNAc2Hex2NeuAc
LQATLDHTGHTSSK	180417_08	15026	46.22	1076.49	2	2151.97	656.217	-1	<not-identified>
KAPPPSGASQTIK	180417_08	15127	46.45	1442.64	2	2884.27	1602.55	-1	<not-identified>
DFTAAFPR	180417_08	15148	46.5	751.364	2	1501.72	577.263	-1	<not-identified>
ILEPTQIPGMK	180417_08	15167	46.55	1087.51	2	2174.02	947.335	-1	<not-identified>
NQVTPLDILSK	180417_08	15167	46.55	1087.51	2	2174.02	946.323	-1	<not-identified>
DFTAAFPR	180417_08	15258	46.78	1119.47	2	2237.94	1313.48	22210000	HexNAc2Hex2Fuc2NeuAc
SLTVSLGPVSK	180417_08	15259	46.8	872.431	2	1743.85	656.218	-1	<not-identified>
GNFLTGLGHR	180417_08	15300	46.9	1010.15	2	2019.3	947.732	-1	<not-identified>
SLTVSLGPVSK	180417_08	15351	47.05	871.378	2	1741.75	654.114	-1	<not-identified>
ILEPTQIPGMK	180417_08	15383	47.12	1087.51	2	2174.02	947.34	-1	<not-identified>
NQVTPLDILSK	180417_08	15383	47.12	1087.51	2	2174.02	946.327	-1	<not-identified>
EDQTSPAPGLR	180417_08	15418	47.2	930.409	2	1859.81	689.235	-1	<not-identified>
DFTAAFPR	180417_08	15441	47.25	936.396	2	1871.78	947.327	11020000	HexNAcHexNeuAc2
DFTAAFPR	180417_08	15605	47.67	790.847	2	1580.69	656.23	11010000	HexNAcHexNeuAc
DFTAAFPR	180417_08	15617	47.7	1182	2	2362.99	1438.53	-1	<not-identified>
DFTAAFPR	180417_08	15618	47.7	1094.99	2	2188.96	1264.51	-1	<not-identified>
DFTAAFPR	180417_08	15636	47.75	665.812	2	1330.62	406.159	20000000	HexNAc2
DFTAAFPR	180417_08	15647	47.77	936.395	2	1871.78	947.325	11020000	HexNAcHexNeuAc2
GNFLTGLGHR	180417_08	15685	47.87	1009.46	2	2017.91	946.34	-1	<not-identified>
WTHSYL	180417_08	15685	47.87	1009.46	2	2017.91	1211.53	-1	<not-identified>
GNFLTGLGHR	180417_08	15692	47.88	1009.45	2	2017.89	946.319	-1	<not-identified>
DFTAAFPR	180417_08	15701	47.9	947.385	2	1893.76	969.306	11020010	HexNAcHexNeuAc2Na
DFTAAFPR	180417_08	15702	47.9	1095.49	2	2189.97	1265.51	-1	<not-identified>
DFTAAFPR	180417_08	15713	47.93	1182.5	2	2363.99	1439.53	-1	<not-identified>
DFTAAFPR	180417_08	15728	47.97	1094.47	2	2187.94	1263.48	-1	<not-identified>
AQDGGPVGTELFR	180417_08	15776	48.08	1147.51	2	2294.02	947.348	-1	<not-identified>
KAPPPSGASQTIK	180417_08	15822	48.17	1114.53	2	2228.05	946.329	-1	<not-identified>
GNFLTGLGHR	180417_08	15839	48.22	1010.15	2	2019.29	947.72	-1	<not-identified>
GNFLTGLGHR	180417_08	15858	48.27	1009.48	2	2017.94	946.374	-1	<not-identified>
DFTAAFPR	180417_08	15864	48.28	789.818	2	1578.63	654.172	-1	<not-identified>
ATAPTAQAPR	180417_08	15871	48.28	820.373	2	1639.74	656.212	-1	<not-identified>
DFTAAFPR	180417_08	15876	48.3	936.396	2	1871.78	947.327	11020000	HexNAcHexNeuAc2
KAPPPSGASQTIK	180417_08	15892	48.33	1297.09	2	2593.18	1311.46	-1	<not-identified>
KAPPPSGASQTIK	180417_08	15921	48.4	968.976	2	1936.94	655.228	-1	<not-identified>
LDWVAPGPSTGSGR	180417_08	15933	48.43	1028.47	2	2055.93	656.232	11010000	HexNAcHexNeuAc
KAPPPSGASQTIK	180417_08	16057	48.72	1114.53	2	2228.05	946.338	-1	<not-identified>
GNFLTGLGHR	180417_08	16084	48.78	1009.48	2	2017.94	946.373	-1	<not-identified>
DFTAAFPR	180417_08	16099	48.82	936.394	2	1871.78	947.323	11020000	HexNAcHexNeuAc2
KAPPPSGASQTIK	180417_08	16120	48.87	1297.09	2	2593.18	1311.46	-1	<not-identified>
LDWVAPGPSTGSGR	180417_08	16162	48.97	1028.47	2	2055.93	656.232	11010000	HexNAcHexNeuAc
KAPPPSGASQTIK	180417_08	16201	49.07	1297.59	2	2594.17	1312.45	22020000	HexNAc2Hex2NeuAc2
KAPPPSGASQTIK	180417_08	16210	49.08	969.469	2	1937.93	656.215	-1	<not-identified>
AQDGGPVGTELFR	180417_08	16248	49.17	1147.51	2	2294.02	947.351	-1	<not-identified>
KAPPPSGASQTIK	180417_08	16257	49.18	968.982	2	1936.96	655.241	-1	<not-identified>
LETPAPQVPAR	180417_08	16319	49.33	1062.99	2	2124.98	946.324	-1	<not-identified>
DFTAAFPR	180417_08	16377	49.47	936.398	2	1871.79	947.331	11020000	HexNAcHexNeuAc2
KAPPPSGASQTIK	180417_08	16480	49.7	968.979	2	1936.95	655.234	-1	<not-identified>
REHPHPTARPW	180417_08	16546	49.85	1020.46	2	2039.92	656.215	-1	<not-identified>
KAPPPSGASQTIK	180417_08	16702	50.22	968.979	2	1936.95	655.234	-1	<not-identified>
REHPHPTARPW	180417_08	16727	50.27	1196.04	2	2391.08	1007.37	-1	<not-identified>
LSEPGLIC(Carbamidomethyl)PDSTPPPHLR	180417_08	16736	50.3	1466.63	2	2932.25	946.235	-1	<not-identified>
LSEPGLIC(Carbamidomethyl)PDSTPPPHLR	180417_08	16742	50.3	1467.18	2	2933.35	947.336	-1	<not-identified>
REHPHPTARPW	180417_08	16764	50.37	1020.46	2	2039.92	656.215	-1	<not-identified>
ILEPTQIPGMK	180417_08	16801	50.47	1108.5	2	2215.99	989.304	-1	<not-identified>
ILEPTQIPGMK	180417_08	16844	50.57	1109.46	2	2217.91	991.227	-1	<not-identified>
REHPHPTARPW	180417_08	16942	50.78	1196.04	2	2391.08	1007.37	-1	<not-identified>
REHPHPTARPW	180417_08	16990	50.92	1020.46	2	2039.91	656.212	-1	<not-identified>
REHPHPTARPW	180417_08	17052	51.05	1195.54	2	2390.08	1006.38	-1	<not-identified>
REHPHPTARPW	180417_08	17062	51.08	1166.01	2	2331.01	947.31	-1	<not-identified>
AQDGGPVGTELF	180417_08	17063	51.08	1260.53	2	2520.04	1329.47	23110000	HexNAc2Hex3FucNeuAc
ATAPTAQAPR	180417_08	17139	51.27	965.401	2	1929.79	946.267	-1	<not-identified>
ATAPTAQAPR	180417_08	17210	51.42	965.922	2	1930.84	947.31	-1	<not-identified>
REHPHPTARPW	180417_08	17214	51.43	1020.46	2	2039.92	656.213	-1	<not-identified>
SLTVSLGPVSKTEGFPK	180417_08	17286	51.6	910.9	2	1820.79	73.8279	-1	<not-identified>
AQDGGPVGTELF	180417_08	17300	51.62	1260.54	2	2520.08	1329.51	-1	<not-identified>
REHPHPTARPW	180417_08	17315	51.65	1166.01	2	2331.01	947.311	-1	<not-identified>
AQDGGPVGTELF	180417_08	17347	51.72	1252.01	2	2503.02	1312.45	22020000	HexNAc2Hex2NeuAc2
AQDGGPVGTELF	180417_08	17403	51.85	1260.53	2	2520.05	1329.48	23110000	HexNAc2Hex3FucNeuAc
ATAPTAQAPR	180417_08	17406	51.87	965.398	2	1929.79	946.261	-1	<not-identified>
ATAPTAQAPR	180417_08	17715	52.57	820.474	2	1639.94	656.413	-1	<not-identified>
NQVTPLDILSK	180417_08	17741	52.62	817.43	2	1633.85	406.157	20000000	HexNAc2
SLTVSLGPVSKTEGFPK	180417_08	17791	52.73	1531.61	2	3062.2	1315.24	-1	<not-identified>
SLTVSLGPVSKTEGFPK	180417_08	17895	52.98	1528.63	2	3056.25	1309.29	-1	<not-identified>
ATAPTAQAPR	180417_08	18203	53.77	965.924	2	1930.84	947.314	11020000	HexNAcHexNeuAc2
NQVTPLDILSK	180417_08	18218	53.82	942.467	2	1883.93	656.232	11010000	HexNAcHexNeuAc
NQVTPLDILSK	180417_08	18293	54	1270.59	2	2540.16	1312.47	-1	<not-identified>
KSATVIPEIEGIK	180417_08	18433	54.33	1167	2	2332.99	948.186	-1	<not-identified>
NQVTPLDILSK	180417_08	18434	54.33	942.462	2	1883.92	656.223	11010000	HexNAcHexNeuAc
VATTVISK	180417_08	18752	55.15	737.342	2	1473.68	655.179	-1	<not-identified>
QLQPVPATQEPDKILPR	180417_08	18834	55.35	958.417	2	1915.83	-14.25	-1	<not-identified>
DVSTPPTVLPDNFPR	180417_08	19283	56.43	1484.66	2	2968.31	1313.46	22210000	HexNAc2Hex2Fuc2NeuAc
DVSTPPTVLPDNFPR	180417_08	19334	56.55	1484.67	2	2968.33	1313.49	-1	<not-identified>
DVSTPPTVLPDNFPR	180417_08	19377	56.67	1484.16	2	2967.32	1312.48	-1	<not-identified>
ESTPPPHVMR	180417_08	19436	56.8	1030.46	2	2059.91	909.343	-1	<not-identified>
DVSTPPTVLPDNFPR	180417_08	19455	56.85	1484.64	2	2968.27	1313.43	-1	<not-identified>
ESTPPPHVMR	180417_08	19526	57.02	1022.44	2	2043.88	893.311	-1	<not-identified>
ESTPPPHVMR	180417_08	19565	57.12	1030.45	2	2059.88	909.317	-1	<not-identified>
ESTPPPHVMR	180417_08	19636	57.28	1030.96	2	2060.9	910.337	-1	<not-identified>
ESTPPPHVMR	180417_08	19648	57.33	1021.94	2	2042.87	892.305	-1	<not-identified>
DVSTPPTVLPDNFPR	180417_08	19695	57.45	1484.64	2	2968.28	1313.44	-1	<not-identified>
DVSTPPTVLPDNFPR	180417_08	19734	57.55	1484.15	2	2967.29	1312.44	-1	<not-identified>
DVSTPPTVLPDNFPR	180417_08	19740	57.57	1485.15	2	2969.28	1314.44	-1	<not-identified>
ESTPPPHVMR	180417_08	19864	57.85	1021.94	2	2042.88	892.314	-1	<not-identified>
DVSTPPTVLPDNFPR	180417_08	19883	57.9	1257.58	2	2514.15	859.307	21010000	HexNAc2HexNeuAc
DVSTPPTVLPDNFPR	180417_08	19938	58.03	1031.01	2	2061	406.161	20000000	HexNAc2
DVSTPPTVLPDNFPR	180417_08	19964	58.1	1484.15	2	2967.3	1312.46	22020000	HexNAc2Hex2NeuAc2
DVSTPPTVLPDNFPR	180417_08	20039	58.28	1031.51	2	2062.01	407.162	-1	<not-identified>
DVSTPPTVLPDNFPR	180417_08	20175	58.62	1031.01	2	2061.01	406.162	20000000	HexNAc2
DVSTPPTVLPDNFPR	180417_08	20222	58.73	1484.15	2	2967.3	1312.45	22020000	HexNAc2Hex2NeuAc2
VAADAVPGSEAPGPRPEADTTR	180417_08	20532	59.47	1015.44	2	2029.88	-134.181	-1	<not-identified>
DC(Carbamidomethyl)LGC(Carbamidomethyl)VHPISTQSPDLEPILR	180417_08	20894	60.38	1240.55	2	2480.09	72.9154	-1	<not-identified>
DC(Carbamidomethyl)LGC(Carbamidomethyl)VHPISTQSPDLEPILR	180417_08	21080	60.83	1241.05	2	2481.1	73.9213	-1	<not-identified>
NKYPDAVATWLNPDPSQK	180417_08	21485	61.82	1496.67	2	2992.33	948.319	-1	<not-identified>
AVAVTLQSH	180417_08	22712	64.92	958.424	2	1915.84	990.331	-1	<not-identified>
AVAVTLQSH	180417_08	26034	73.55	936.41	2	1871.81	946.303	-1	<not-identified>
VATTVISK	180417_08	26340	74.35	738.297	2	1475.59	657.089	-1	<not-identified>
VATTVISK	180417_08	26540	74.87	738.297	2	1475.59	657.089	-1	<not-identified>
AVAVTLQSH	180417_08	26849	75.8	937.424	2	1873.84	948.331	-1	<not-identified>
AVAVTLQSH	180417_08	26997	76.22	936.401	2	1871.8	946.285	-1	<not-identified>
TVTWPDMELPLPR	180417_08	27163	76.7	1251.58	2	2502.15	947.347	-1	<not-identified>
AVAVTLQSH	180417_08	27435	77.43	937.43	2	1873.85	948.344	-1	<not-identified>
AVAVTLQSH	180417_08	29643	83.37	937.486	2	1873.96	948.454	-1	<not-identified>
AVAVTLQSH	180417_08	29730	83.62	937.476	2	1873.95	948.436	-1	<not-identified>
AVAVTLQSH	180417_08	30621	86.22	936.445	2	1871.88	946.372	-1	<not-identified>
AVAVTLQSH	180417_08	30630	86.23	936.454	2	1871.9	946.391	-1	<not-identified>
VATTVISK	180417_09	6854	24.88	1474.39	3	4421.15	3602.66	-1	<not-identified>
VATTVISK	180417_09	7475	26.62	1474.72	3	4422.13	3603.64	-1	<not-identified>
DALPDNENKKPTAIPK	180417_09	8139	28.35	900.089	3	2698.25	947.318	11020000	HexNAcHexNeuAc2
VATTVISK	180417_09	8181	28.45	1474.34	3	4421.01	3602.52	-1	<not-identified>
VATTVISK	180417_09	8504	29.25	1475.6	3	4424.79	3606.29	-1	<not-identified>
AVAVTLQSH	180417_09	8928	30.3	1232.58	3	3695.71	2770.2	-1	<not-identified>
AVAVTLQSH	180417_09	8962	30.37	1266.23	3	3796.68	2871.17	-1	<not-identified>
VEDLHVGATVAPSSR	180417_09	9160	30.85	732.015	3	2194.03	656.234	11010000	HexNAcHexNeuAc
AVAVTLQSH	180417_09	9190	30.92	1267.58	3	3800.72	2875.21	-1	<not-identified>
SDALPDNENKKPTAIPK	180417_09	9754	32.23	749.39	3	2246.16	408.191	-1	<not-identified>
SDALPDNENKKPTAIPK	180417_09	9761	32.23	748.383	3	2243.13	405.168	-1	<not-identified>
AQGSQVLESTPPPHVMR	180417_09	10096	33.05	927.755	3	2781.25	947.323	11020000	HexNAcHexNeuAc2
AQGSQVLESTPPPHVMR	180417_09	10115	33.08	1336.62	3	4007.84	2173.91	-1	<not-identified>
AQGSQVLESTPPPHVMR	180417_09	10136	33.12	947.772	3	2841.3	1007.37	-1	<not-identified>
RLTPGVHELPVQQPEHR	180417_09	10642	34.25	980.804	3	2940.4	947.324	11020000	HexNAcHexNeuAc2
DLSDALPDNENKKPTAIPK	180417_09	10829	34.67	1361.19	3	4081.54	2015.46	-1	<not-identified>
SDALPDNENKKPTAIPK	180417_09	11403	36.32	928.77	3	2784.29	946.329	-1	<not-identified>
TMHVATVFTDGGPRTLR	180417_09	11422	36.37	936.095	3	2806.27	947.311	-1	<not-identified>
TMHVATVFTDGGPRTLR	180417_09	11426	36.38	936.437	3	2807.3	948.338	-1	<not-identified>
SDALPDNENKKPTAIPK	180417_09	11458	36.45	1098.86	3	3294.55	1456.59	-1	<not-identified>
SDALPDNENKKPTAIPK	180417_09	11463	36.47	1151.53	3	3452.58	1614.61	-1	<not-identified>
SDALPDNENKKPTAIPK	180417_09	11470	36.48	1152.19	3	3454.57	1616.6	-1	<not-identified>
SDALPDNENKKPTAIPK	180417_09	11478	36.5	948.444	3	2843.32	1005.35	-1	<not-identified>
SDALPDNENKKPTAIPK	180417_09	11486	36.52	1151.19	3	3451.56	1613.6	-1	<not-identified>
DLSDALPDNENKKPTAIPK	180417_09	11493	36.52	1005.14	3	3013.39	947.317	11020000	HexNAcHexNeuAc2
SDALPDNENKKPTAIPK	180417_09	11514	36.57	1409.64	3	4226.92	2388.95	-1	<not-identified>
SDALPDNENKKPTAIPK	180417_09	11522	36.58	1408.63	3	4223.88	2385.91	-1	<not-identified>
SDALPDNENKKPTAIPK	180417_09	11538	36.62	1409.31	3	4225.92	2387.95	-1	<not-identified>
TMHVATVFTDGGPRTLR	180417_09	11554	36.67	936.431	3	2807.28	948.318	-1	<not-identified>
DLSDALPDNENKKPTAIPK	180417_09	11597	36.77	1005.47	3	3014.39	948.317	-1	<not-identified>
SDALPDNENKKPTAIPK	180417_09	11621	36.83	928.771	3	2784.3	946.334	-1	<not-identified>
SDALPDNENKKPTAIPK	180417_09	11725	37.18	1393.33	3	4177.96	2340	-1	<not-identified>
SDALPDNENKKPTAIPK	180417_09	11782	37.37	928.768	3	2784.29	946.323	-1	<not-identified>
DKEC(Carbamidomethyl)TEC(Carbamidomethyl)DPLPNPSLTAR	180417_09	11873	37.62	920.728	3	2760.17	657.222	-1	<not-identified>
DKEC(Carbamidomethyl)TEC(Carbamidomethyl)DPLPNPSLTAR	180417_09	11896	37.67	920.396	3	2759.17	656.226	11010000	HexNAcHexNeuAc
DKEC(Carbamidomethyl)TEC(Carbamidomethyl)DPLPNPSLTAR	180417_09	11915	37.73	921.018	3	2761.04	658.092	-1	<not-identified>
LSEPGLIC(Carbamidomethyl)PDSTPPPHLR	180417_09	13892	43.68	978.446	3	2933.32	947.311	-1	<not-identified>
LSEPGLIC(Carbamidomethyl)PDSTPPPHLR	180417_09	13901	43.72	978.781	3	2934.33	948.317	-1	<not-identified>
LSEPGLIC(Carbamidomethyl)PDSTPPPHLR	180417_09	14055	44.23	978.447	3	2933.33	947.316	11020000	HexNAcHexNeuAc2
DVSTPPTVLPDNFPR	180417_09	17491	55.32	1484.68	3	4452.02	2797.18	-1	<not-identified>
DVSTPPTVLPDNFPR	180417_09	17587	55.58	1485.02	3	4453.05	2798.2	-1	<not-identified>
YPELFPAHQSPMFPDTR	180417_09	18503	58.28	1345.62	3	4034.84	2001.88	-1	<not-identified>
VATTVISK	180417_09	30652	88.72	737.006	3	2209	1390.5	-1	<not-identified>
VATTVISK	180417_09	30972	89.72	737.006	3	2209	1390.51	-1	<not-identified>
VATTVISK	180417_09	32012	92.75	737.008	3	2209.01	1390.51	-1	<not-identified>
VATTVISK	180417_09	33174	96.3	737.006	3	2209	1390.51	-1	<not-identified>
VATTVISK	180417_09	33320	96.8	737.007	3	2209.01	1390.51	-1	<not-identified>
VATTVISK	180417_09	33467	97.3	737.007	3	2209.01	1390.51	-1	<not-identified>
VATTVISK	180417_09	33778	98.37	737.007	3	2209.01	1390.51	-1	<not-identified>
VATTVISK	180417_09	34086	99.42	737.006	3	2209	1390.51	-1	<not-identified>
REHPHPTARPW	180417_10	1076	3.58	1020.46	2	2039.92	656.214	-1	<not-identified>
REHPHPTARPW	180417_10	1122	3.68	1049.98	2	2098.96	715.258	-1	<not-identified>
VTLSPKDC(Carbamidomethyl)QVFR	180417_10	5624	20.03	1053	2	2104.99	655.234	-1	<not-identified>
SALQPSPTHSSSNTQR	180417_10	5738	20.3	1177.51	2	2354.02	656.202	-1	<not-identified>
VATTVISK	180417_10	6028	21.03	1212.03	2	2423.05	1604.55	-1	<not-identified>
VATTVISK	180417_10	6100	21.25	1065.98	2	2130.96	1312.46	22020000	HexNAc2Hex2NeuAc2
VATTVISK	180417_10	6125	21.32	1125.54	2	2250.07	1431.57	-1	<not-identified>
VATTVISK	180417_10	6130	21.33	1095.5	2	2190	1371.5	-1	<not-identified>
VATTVISK	180417_10	6172	21.43	1213.05	2	2425.09	1606.59	-1	<not-identified>
VATTVISK	180417_10	6195	21.5	1076.97	2	2152.93	1334.43	22020010	HexNAc2Hex2NeuAc2Na
DNENKKPTAIPK	180417_10	6204	21.52	1151.54	2	2302.06	947.332	11020000	HexNAcHexNeuAc2
VATTVISK	180417_10	6252	21.65	1066.48	2	2131.95	1313.45	-1	<not-identified>
DNENKKPTAIPK	180417_10	6272	21.7	1152.03	2	2303.06	948.324	-1	<not-identified>
VATTVISK	180417_10	6306	21.78	1065.98	2	2130.96	1312.46	22020000	HexNAc2Hex2NeuAc2
REDQTSPAPGLR	180417_10	6384	22	846.407	2	1691.81	365.13	11000000	HexNAcHex
REDQTSPAPGLR	180417_10	6723	22.87	991.959	2	1982.91	656.234	-1	<not-identified>
REDQTSPAPGLR	180417_10	6734	22.92	991.514	2	1982.02	655.345	-1	<not-identified>
REDQTSPAPGLR	180417_10	6744	22.93	993.405	2	1985.8	659.126	-1	<not-identified>
REDQTSPAPGLR	180417_10	6771	23	846.409	2	1691.81	365.135	11000000	HexNAcHex
REDQTSPAPGLR	180417_10	6875	23.28	1137.51	2	2274.01	947.334	-1	<not-identified>
REDQTSPAPGLR	180417_10	6911	23.37	847.408	2	1693.81	367.132	-1	<not-identified>
REDQTSPAPGLR	180417_10	6914	23.37	846.911	2	1692.82	366.139	-1	<not-identified>
VATTVISK	180417_10	7022	23.6	767.398	2	1533.79	715.289	-1	<not-identified>
VATTVISK	180417_10	7025	23.62	737.867	2	1474.73	656.229	11010000	HexNAcHexNeuAc
VATTVISK	180417_10	7039	23.65	748.859	2	1496.71	678.212	11010010	HexNAcHexNeuAcNa
VATTVISK	180417_10	7072	23.72	1018.49	2	2035.97	1217.47	-1	<not-identified>
VATTVISK	180417_10	7126	23.85	870.364	2	1739.72	921.222	-1	<not-identified>
EDQTSPAPGLR	180417_10	7131	23.87	913.903	2	1826.8	656.223	11010000	HexNAcHexNeuAc
REDQTSPAPGLR	180417_10	7151	23.92	846.91	2	1692.81	366.137	-1	<not-identified>
EDQTSPAPGLR	180417_10	7159	23.93	914.406	2	1827.81	657.23	-1	<not-identified>
VATTVISK	180417_10	7238	24.12	737.867	2	1474.73	656.228	11010000	HexNAcHexNeuAc
VATTVISK	180417_10	7265	24.18	1474.72	2	2948.44	2129.94	-1	<not-identified>
VATTVISK	180417_10	7480	24.67	1065.98	2	2130.96	1312.46	22020000	HexNAc2Hex2NeuAc2
DANISQPETTKEGLR	180417_10	7964	25.78	1158.04	2	2315.06	656.23	11010000	HexNAcHexNeuAc
VATTVISK	180417_10	7982	25.83	738.377	2	1475.75	657.248	-1	<not-identified>
VATTVISK	180417_10	8056	26	894.406	2	1787.81	969.307	11020010	HexNAcHexNeuAc2Na
VATTVISK	180417_10	8060	26.02	883.414	2	1765.82	947.323	11020000	HexNAcHexNeuAc2
VATTVISK	180417_10	8080	26.05	883.457	2	1765.91	947.409	-1	<not-identified>
VATTVISK	180417_10	8087	26.08	912.938	2	1824.87	1006.37	-1	<not-identified>
VATTVISK	180417_10	8213	26.35	738.377	2	1475.75	657.249	-1	<not-identified>
VATTVISK	180417_10	8259	26.45	738.378	2	1475.75	657.251	-1	<not-identified>
RLETPAPQVPAR	180417_10	8364	26.73	1141.55	2	2282.1	947.345	-1	<not-identified>
RLETPAPQVPAR	180417_10	8437	26.9	1141.54	2	2282.08	947.322	11020000	HexNAcHexNeuAc2
RLETPAPQVPAR	180417_10	8456	26.93	1142.04	2	2283.08	948.327	-1	<not-identified>
LETPAPQVPAR	180417_10	8732	27.63	1063.49	2	2125.97	947.315	11020000	HexNAcHexNeuAc2
VATTVISK	180417_10	8773	27.73	883.417	2	1765.83	947.329	11020000	HexNAcHexNeuAc2
LETPAPQVPAR	180417_10	8800	27.8	1093.02	2	2185.04	1006.38	-1	<not-identified>
DALPDNENKKPTAIPK	180417_10	8973	28.2	1349.64	2	2698.27	947.34	-1	<not-identified>
DALPDNENKKPTAIPK	180417_10	8996	28.27	1379.17	2	2757.33	1006.39	-1	<not-identified>
DALPDNENKKPTAIPK	180417_10	9017	28.32	1379.67	2	2758.32	1007.39	-1	<not-identified>
DALPDNENKKPTAIPK	180417_10	9112	28.52	1379.15	2	2757.3	1006.36	-1	<not-identified>
DALPDNENKKPTAIPK	180417_10	9150	28.6	1350.64	2	2700.27	949.341	-1	<not-identified>
DALPDNENKKPTAIPK	180417_10	9188	28.68	1350.63	2	2700.24	949.309	-1	<not-identified>
VATTVISK	180417_10	9192	28.7	1475.08	2	2949.15	2130.65	-1	<not-identified>
VATTVISK	180417_10	9201	28.73	1474.58	2	2948.16	2129.66	-1	<not-identified>
DALPDNENKKPTAIPK	180417_10	9263	28.85	1350.12	2	2699.24	948.302	-1	<not-identified>
AVAVTLQSH	180417_10	9485	29.37	1119.99	2	2238.97	1313.46	-1	<not-identified>
AVAVTLQSH	180417_10	9505	29.42	1119.48	2	2237.96	1312.45	22020000	HexNAc2Hex2NeuAc2
AVAVTLQSH	180417_10	9728	29.93	936.42	2	1871.83	946.323	-1	<not-identified>
AVAVTLQSH	180417_10	9733	29.95	947.91	2	1894.81	969.302	11020010	HexNAcHexNeuAc2Na
AVAVTLQSH	180417_10	9743	29.98	936.921	2	1872.84	947.325	11020000	HexNAcHexNeuAc2
AVAVTLQSH	180417_10	9750	29.98	995.972	2	1990.94	1065.43	-1	<not-identified>
AVAVTLQSH	180417_10	9772	30.03	977.44	2	1953.87	1028.36	-1	<not-identified>
AVAVTLQSH	180417_10	9783	30.05	1006.96	2	2012.91	1087.4	-1	<not-identified>
AVAVTLQSH	180417_10	9788	30.07	1565.92	2	3130.84	2205.33	-1	<not-identified>
AVAVTLQSH	180417_10	9789	30.07	1025.49	2	2049.97	1124.46	-1	<not-identified>
AVAVTLQSH	180417_10	9796	30.12	1513.66	2	3026.31	2100.8	-1	<not-identified>
AVAVTLQSH	180417_10	9810	30.13	1480.63	2	2960.25	2034.74	-1	<not-identified>
AVAVTLQSH	180417_10	9818	30.15	1119.51	2	2238.02	1312.51	-1	<not-identified>
AVAVTLQSH	180417_10	9831	30.18	1282.1	2	2563.19	1637.68	-1	<not-identified>
AVAVTLQSH	180417_10	9834	30.18	1007.46	2	2013.92	1088.41	-1	<not-identified>
AVAVTLQSH	180417_10	9855	30.23	1282.59	2	2564.18	1638.67	-1	<not-identified>
AVAVTLQSH	180417_10	9862	30.25	1420.64	2	2840.28	1914.77	-1	<not-identified>
AVAVTLQSH	180417_10	9878	30.28	977.935	2	1954.86	1029.35	-1	<not-identified>
AVAVTLQSH	180417_10	9898	30.33	995.465	2	1989.92	1064.41	-1	<not-identified>
HLVTTVPKDPEAAE	180417_10	9923	30.38	1082.01	2	2163.01	656.228	11010000	HexNAcHexNeuAc
HLVTTVPKDPEAAE	180417_10	9939	30.42	1227.55	2	2454.1	947.321	11020000	HexNAcHexNeuAc2
AVAVTLQSH	180417_10	9945	30.43	996.471	2	1991.93	1066.42	-1	<not-identified>
AVAVTLQSH	180417_10	9965	30.48	947.909	2	1894.81	969.301	11020010	HexNAcHexNeuAc2Na
HLVTTVPKDPEAAE	180417_10	9966	30.48	1257.58	2	2514.15	1007.37	-1	<not-identified>
AVAVTLQSH	180417_10	9977	30.5	936.923	2	1872.84	947.329	11020000	HexNAcHexNeuAc2
HLVTTVPKDPEAAE	180417_10	10006	30.57	1257.08	2	2513.15	1006.37	-1	<not-identified>
AVAVTLQSH	180417_10	10030	30.62	936.92	2	1872.83	947.323	11020000	HexNAcHexNeuAc2
VEDLHVGATVAPSSR	180417_10	10070	30.7	1097.52	2	2194.03	656.233	11010000	HexNAcHexNeuAc
AVAVTLQSH	180417_10	10176	30.97	937.429	2	1873.85	948.341	-1	<not-identified>
VWGQGQSPRPENSLER	180417_10	10177	30.97	1249.58	2	2498.15	658.245	-1	<not-identified>
HLVTTVPKDPEAAE	180417_10	10187	30.98	1227.56	2	2454.12	947.341	-1	<not-identified>
VWGQGQSPRPENSLER	180417_10	10191	31	1248.57	2	2496.14	656.228	11010000	HexNAcHexNeuAc
AVAVTLQSH	180417_10	10206	31.03	936.924	2	1872.84	947.331	11020000	HexNAcHexNeuAc2
AVAVTLQSH	180417_10	10217	31.05	936.422	2	1871.84	946.326	-1	<not-identified>
AVAVTLQSH	180417_10	10251	31.12	937.428	2	1873.85	948.338	-1	<not-identified>
AVAVTLQSH	180417_10	10258	31.12	936.42	2	1871.83	946.323	-1	<not-identified>
VEDLHVGATVAPSSR	180417_10	10313	31.23	1097.53	2	2194.04	656.247	-1	<not-identified>
VEDLHVGATVAPSSR	180417_10	10480	31.6	1098.02	2	2195.03	657.232	-1	<not-identified>
VEDLHVGATVAPSSR	180417_10	10554	31.75	1097.52	2	2194.03	656.237	-1	<not-identified>
VEDLHVGATVAPSSR	180417_10	10638	31.95	1243.55	2	2486.1	948.301	-1	<not-identified>
VEDLHVGATVAPSSR	180417_10	10702	32.1	1243.07	2	2485.12	947.326	11020000	HexNAcHexNeuAc2
VEDLHVGATVAPSSR	180417_10	10747	32.18	1243.57	2	2486.13	948.33	-1	<not-identified>
VEDLHVGATVAPSSR	180417_10	10756	32.22	1098.03	2	2195.04	657.247	-1	<not-identified>
SDALPDNENKKPTAIPK	180417_10	10761	32.22	1122.07	2	2243.13	405.168	-1	<not-identified>
AQGSQVLESTPPPHVMR	180417_10	10775	32.25	1245.57	2	2490.14	656.214	-1	<not-identified>
VEDLHVGATVAPSSR	180417_10	10803	32.32	1097.52	2	2194.03	656.231	11010000	HexNAcHexNeuAc
AQGSQVLESTPPPHVMR	180417_10	10811	32.33	1275.11	2	2549.22	715.289	-1	<not-identified>
VWGQGQSPRPENSLER	180417_10	10831	32.38	1394.62	2	2788.23	948.323	-1	<not-identified>
VEDLHVGATVAPSSR	180417_10	10838	32.4	1098.02	2	2195.03	657.23	-1	<not-identified>
VWGQGQSPRPENSLER	180417_10	10858	32.45	1394.12	2	2787.23	947.321	11020000	HexNAcHexNeuAc2
VEDLHVGATVAPSSR	180417_10	11031	32.82	1098.02	2	2195.03	657.238	-1	<not-identified>
VEDLHVGATVAPSSR	180417_10	11051	32.85	1097.52	2	2194.03	656.233	11010000	HexNAcHexNeuAc
AQGSQVLESTPPPHVMR	180417_10	11090	32.95	1391.63	2	2782.24	948.317	-1	<not-identified>
AQGSQVLESTPPPHVMR	180417_10	11100	32.97	1420.63	2	2840.26	1006.33	-1	<not-identified>
AQGSQVLESTPPPHVMR	180417_10	11107	33	1391.13	2	2781.25	947.319	11020000	HexNAcHexNeuAc2
AQGSQVLESTPPPHVMR	180417_10	11111	33	1421.15	2	2841.29	1007.36	-1	<not-identified>
AQGSQVLESTPPPHVMR	180417_10	11137	33.07	967.46	2	1933.91	99.9854	-1	<not-identified>
AQGSQVLESTPPPHVMR	180417_10	11155	33.08	1420.66	2	2840.31	1006.38	-1	<not-identified>
AQGSQVLESTPPPHVMR	180417_10	11250	33.27	1420.12	2	2839.24	1005.31	-1	<not-identified>
AQGSQVLESTPPPHVMR	180417_10	11355	33.52	1391.13	2	2781.25	947.323	11020000	HexNAcHexNeuAc2
AQGSQVLESTPPPHVMR	180417_10	11375	33.57	1421.15	2	2841.3	1007.37	-1	<not-identified>
AQGSQVLESTPPPHVMR	180417_10	11400	33.6	1391.63	2	2782.25	948.319	-1	<not-identified>
SDALPDNENKKPTAIPK	180417_10	11571	33.92	1247.1	2	2493.19	655.226	-1	<not-identified>
SDALPDNENKKPTAIPK	180417_10	11632	34.05	1277.54	2	2554.07	716.106	-1	<not-identified>
TMHVATVFTDGGPRTLR	180417_10	11646	34.08	1258.1	2	2515.2	656.236	-1	<not-identified>
RLTPGVHELPVQQPEHR	180417_10	11699	34.18	1470.71	2	2940.4	947.331	11020000	HexNAcHexNeuAc2
RLTPGVHELPVQQPEHR	180417_10	11716	34.22	1470.69	2	2940.37	947.299	-1	<not-identified>
SDALPDNENKKPTAIPK	180417_10	12823	36.3	1392.65	2	2784.29	946.328	-1	<not-identified>
SDALPDNENKKPTAIPK	180417_10	12894	36.42	1403.63	2	2806.25	968.289	-1	<not-identified>
TMHVATVFTDGGPRTLR	180417_10	12894	36.42	1403.63	2	2806.25	947.295	-1	<not-identified>
DLSDALPDNENKKPTAIPK	180417_10	12905	36.45	1507.68	2	3014.36	948.285	-1	<not-identified>
DLSDALPDNENKKPTAIPK	180417_10	12914	36.47	1507.7	2	3014.4	948.323	-1	<not-identified>
DLSDALPDNENKKPTAIPK	180417_10	12929	36.48	1507.2	2	3013.39	947.315	11020000	HexNAcHexNeuAc2
SDALPDNENKKPTAIPK	180417_10	12958	36.53	1403.65	2	2806.28	968.317	-1	<not-identified>
DLSDALPDNENKKPTAIPK	180417_10	13036	36.67	1536.72	2	3072.43	1006.35	-1	<not-identified>
SDALPDNENKKPTAIPK	180417_10	13077	36.75	1392.64	2	2784.27	946.3	-1	<not-identified>
SDALPDNENKKPTAIPK	180417_10	13134	36.83	1393.14	2	2785.27	947.306	-1	<not-identified>
SDALPDNENKKPTAIPK	180417_10	13137	36.85	1393.64	2	2786.27	948.303	-1	<not-identified>
DKEC(Carbamidomethyl)TEC(Carbamidomethyl)DPLPNPSLTAR	180417_10	13455	37.45	1380.59	2	2760.17	657.218	-1	<not-identified>
DKEC(Carbamidomethyl)TEC(Carbamidomethyl)DPLPNPSLTAR	180417_10	13479	37.5	1380.1	2	2759.18	656.236	-1	<not-identified>
AVAVTLQSH	180417_10	13596	37.72	957.425	2	1913.84	988.333	-1	<not-identified>
DKEC(Carbamidomethyl)TEC(Carbamidomethyl)DPLPNPSLTAR	180417_10	13664	37.85	1409.14	2	2817.28	714.332	-1	<not-identified>
AVAVTLQSH	180417_10	13755	38.03	957.437	2	1913.87	988.356	-1	<not-identified>
AVAVTLQSH	180417_10	13798	38.13	957.937	2	1914.87	989.356	-1	<not-identified>
AVAVTLQSH	180417_10	13857	38.25	958.434	2	1915.86	990.35	-1	<not-identified>
LSEPGLIC(Carbamidomethyl)PDSTPPPHLR	180417_10	14662	39.85	1322.13	2	2643.25	657.235	-1	<not-identified>
LSEPGLIC(Carbamidomethyl)PDSTPPPHLR	180417_10	14699	39.92	1321.61	2	2642.22	656.21	-1	<not-identified>
ALSPQQVTRLPSGY	180417_10	14820	40.13	1232.57	2	2464.14	947.324	11020000	HexNAcHexNeuAc2
LSEPGLIC(Carbamidomethyl)PDSTPPPHLR	180417_10	15055	40.58	1321.58	2	2642.16	656.147	-1	<not-identified>
LSEPGLIC(Carbamidomethyl)PDSTPPPHLR	180417_10	15224	40.9	1322.12	2	2643.24	657.224	-1	<not-identified>
LSEPGLIC(Carbamidomethyl)PDSTPPPHLR	180417_10	15285	41	1321.63	2	2642.26	656.244	-1	<not-identified>
SLTVSLGPVSK	180417_10	16178	42.78	1018.98	2	2036.94	949.309	-1	<not-identified>
ILEPTQIPGMK	180417_10	16312	43.08	1088	2	2175	948.318	-1	<not-identified>
LSEPGLIC(Carbamidomethyl)PDSTPPPHLR	180417_10	16377	43.23	1467.67	2	2934.34	948.326	-1	<not-identified>
LSEPGLIC(Carbamidomethyl)PDSTPPPHLR	180417_10	16420	43.33	1467.17	2	2933.33	947.319	11020000	HexNAcHexNeuAc2
LSEPGLIC(Carbamidomethyl)PDSTPPPHLR	180417_10	16426	43.35	1467.18	2	2933.36	947.351	-1	<not-identified>
LSEPGLIC(Carbamidomethyl)PDSTPPPHLR	180417_10	16482	43.48	1466.68	2	2932.36	946.347	-1	<not-identified>
LSEPGLIC(Carbamidomethyl)PDSTPPPHLR	180417_10	16604	43.75	1467.67	2	2934.34	948.324	-1	<not-identified>
LSEPGLIC(Carbamidomethyl)PDSTPPPHLR	180417_10	16655	43.87	1467.18	2	2933.34	947.333	-1	<not-identified>
LSEPGLIC(Carbamidomethyl)PDSTPPPHLR	180417_10	16753	44.07	1467.65	2	2934.3	948.289	-1	<not-identified>
KAPPPSGASQTIK	180417_10	16841	44.25	968.982	2	1936.96	655.24	-1	<not-identified>
KAPPPSGASQTIK	180417_10	16878	44.33	969.98	2	1938.95	657.237	-1	<not-identified>
KAPPPSGASQTIK	180417_10	16888	44.35	968.979	2	1936.95	655.235	-1	<not-identified>
LSEPGLIC(Carbamidomethyl)PDSTPPPHLR	180417_10	16929	44.45	1467.67	2	2934.34	948.323	-1	<not-identified>
DFTAAFPR	180417_10	16945	44.48	936.404	2	1871.8	947.344	-1	<not-identified>
LSEPGLIC(Carbamidomethyl)PDSTPPPHLR	180417_10	16950	44.48	1468.18	2	2935.36	949.349	-1	<not-identified>
LSEPGLIC(Carbamidomethyl)PDSTPPPHLR	180417_10	17003	44.58	1467.69	2	2934.37	948.354	-1	<not-identified>
DFTAAFPR	180417_10	17008	44.6	936.392	2	1871.78	947.319	11020000	HexNAcHexNeuAc2
LSEPGLIC(Carbamidomethyl)PDSTPPPHLR	180417_10	17066	44.7	1466.69	2	2932.36	946.352	-1	<not-identified>
KAPPPSGASQTIK	180417_10	17096	44.77	969.482	2	1937.96	656.24	-1	<not-identified>
DFTAAFPR	180417_10	17120	44.82	935.907	2	1870.81	946.35	-1	<not-identified>
LSEPGLIC(Carbamidomethyl)PDSTPPPHLR	180417_10	17123	44.82	1467.18	2	2933.35	947.334	-1	<not-identified>
KAPPPSGASQTIK	180417_10	17146	44.87	968.98	2	1936.95	655.237	-1	<not-identified>
DFTAAFPR	180417_10	17222	45.02	935.894	2	1870.78	946.323	-1	<not-identified>
DFTAAFPR	180417_10	17289	45.17	936.389	2	1871.77	947.313	-1	<not-identified>
DFTAAFPR	180417_10	17474	45.53	935.891	2	1870.77	946.317	-1	<not-identified>
DFTAAFPR	180417_10	17723	46.03	935.89	2	1870.77	946.314	-1	<not-identified>
REHPHPTARPW	180417_10	18271	47.12	1020.46	2	2039.91	656.206	-1	<not-identified>
KAPPPSGASQTIK	180417_10	18411	47.42	1114	2	2227	945.285	-1	<not-identified>
REHPHPTARPW	180417_10	18731	48.1	1020.47	2	2039.92	656.221	11010000	HexNAcHexNeuAc
DVSTPPTVLPDNFPR	180417_10	22139	55.28	1484.17	2	2967.32	1312.48	-1	<not-identified>
DC(Carbamidomethyl)LGC(Carbamidomethyl)VHPISTQSPDLEPILR	180417_10	22332	55.65	1532.71	2	3064.41	657.234	-1	<not-identified>
DC(Carbamidomethyl)LGC(Carbamidomethyl)VHPISTQSPDLEPILR	180417_10	22409	55.8	1532.74	2	3064.46	657.289	-1	<not-identified>
YPELFPAHQSPMFPDTR	180417_10	22428	55.85	1345.59	2	2690.18	657.216	-1	<not-identified>
DVSTPPTVLPDNFPR	180417_10	22435	55.87	1484.65	2	2968.29	1313.44	-1	<not-identified>
DC(Carbamidomethyl)LGC(Carbamidomethyl)VHPISTQSPDLEPILR	180417_10	22473	55.95	1532.2	2	3063.39	656.214	-1	<not-identified>
DC(Carbamidomethyl)LGC(Carbamidomethyl)VHPISTQSPDLEPILR	180417_10	22581	56.17	1532.71	2	3064.41	657.232	-1	<not-identified>
DVSTPPTVLPDNFPR	180417_10	22607	56.2	1484.16	2	2967.31	1312.47	22020000	HexNAc2Hex2NeuAc2
DC(Carbamidomethyl)LGC(Carbamidomethyl)VHPISTQSPDLEPILR	180417_10	22658	56.32	1532.73	2	3064.45	657.278	-1	<not-identified>
DVSTPPTVLPDNFPR	180417_10	22659	56.32	1483.67	2	2966.34	1311.5	-1	<not-identified>
DVSTPPTVLPDNFPR	180417_10	22805	56.6	1484.14	2	2967.27	1312.43	-1	<not-identified>
DVSTPPTVLPDNFPR	180417_10	22911	56.8	1484.16	2	2967.31	1312.46	22020000	HexNAc2Hex2NeuAc2
DC(Carbamidomethyl)LGC(Carbamidomethyl)VHPISTQSPDLEPILR	180417_10	22932	56.83	1532.71	2	3064.42	657.241	-1	<not-identified>
DVSTPPTVLPDNFPR	180417_10	22985	56.95	1484.67	2	2968.33	1313.48	22210000	HexNAc2Hex2Fuc2NeuAc
DC(Carbamidomethyl)LGC(Carbamidomethyl)VHPISTQSPDLEPILR	180417_10	23061	57.07	1532.21	2	3063.41	656.233	11010000	HexNAcHexNeuAc
DVSTPPTVLPDNFPR	180417_10	23083	57.12	1484.65	2	2968.29	1313.45	-1	<not-identified>
YPELFPAHQSPMFPDTR	180417_10	23096	57.15	1346.11	2	2691.22	658.258	-1	<not-identified>
DVSTPPTVLPDNFPR	180417_10	23185	57.3	1484.15	2	2967.3	1312.45	22020000	HexNAc2Hex2NeuAc2
DC(Carbamidomethyl)LGC(Carbamidomethyl)VHPISTQSPDLEPILR	180417_10	23215	57.37	1532.72	2	3064.43	657.255	-1	<not-identified>
DVSTPPTVLPDNFPR	180417_10	23271	57.47	1483.66	2	2966.31	1311.46	-1	<not-identified>
DVSTPPTVLPDNFPR	180417_10	23513	57.93	1301.59	2	2602.17	947.328	11020000	HexNAcHexNeuAc2
DVSTPPTVLPDNFPR	180417_10	23535	57.97	1447.64	2	2894.27	1239.42	-1	<not-identified>
YPELFPAHQSPMFPDTR	180417_10	23546	57.98	1345.62	2	2690.23	657.272	-1	<not-identified>
DVSTPPTVLPDNFPR	180417_10	23629	58.17	1447.13	2	2893.26	1238.42	11030000	HexNAcHexNeuAc3
REHPHPTARPW	180417_10	44025	99.25	1020.46	2	2039.91	656.205	-1	<not-identified>
GTRDPPPSPAR	180417_13	5198	19.35	821.69	3	2463.06	1312.46	22020000	HexNAc2Hex2NeuAc2
GTRDPPPSPAR	180417_13	5478	19.93	821.689	3	2463.05	1312.45	22020000	HexNAc2Hex2NeuAc2
GTRDPPPSPAR	180417_13	5740	20.47	821.69	3	2463.06	1312.46	22020000	HexNAc2Hex2NeuAc2
VATTVISK	180417_13	5896	20.78	808.021	3	2422.05	1603.55	22030000	HexNAc2Hex2NeuAc3
GTRDPPPSPAR	180417_13	6063	21.1	821.688	3	2463.05	1312.45	22020000	HexNAc2Hex2NeuAc2
VATTVISK	180417_13	6396	21.75	710.989	3	2130.95	1312.46	22020000	HexNAc2Hex2NeuAc2
VATTVISK	180417_13	6541	22.02	718.319	3	2152.94	1334.44	22020010	HexNAc2Hex2NeuAc2Na
VATTVISK	180417_13	6695	22.3	710.99	3	2130.95	1312.46	22020000	HexNAc2Hex2NeuAc2
VWGQGQSPRPENSLER	180417_13	7004	22.87	1401.58	3	4202.72	2362.81	-1	<not-identified>
VWGQGQSPRPENSLER	180417_13	7063	22.97	1056.92	4	4224.67	2384.76	-1	<not-identified>
ATAPTAQAPR	180417_13	7112	23.07	765.999	3	2295.98	1312.46	22020000	HexNAc2Hex2NeuAc2
SALQPSPTHSSSNTQR	180417_13	7236	23.32	1004.09	3	3010.26	1312.44	22020000	HexNAc2Hex2NeuAc2
VWGQGQSPRPENSLER	180417_13	7265	23.37	1053.18	4	4209.68	2369.77	-1	<not-identified>
GSQVLESTPPPHVMR	180417_13	7289	23.42	974.404	4	3894.59	2259.76	33040000	HexNAc3Hex3NeuAc4
PASAPPATSNPDPAVSR	180417_13	7289	23.42	974.404	4	3894.59	2259.78	33040000	HexNAc3Hex3NeuAc4
VWGQGQSPRPENSLER	180417_13	7289	23.42	974.404	4	3894.59	2054.69	-1	<not-identified>
VWGQGQSPRPENSLER	180417_13	7295	23.42	982.919	4	3928.65	2088.74	-1	<not-identified>
SVAPMRGGEITAHW	180417_13	7305	23.43	994.758	3	2982.26	1470.52	-1	<not-identified>
GSQVLESTPPPHVMR	180417_13	7316	23.47	1145.81	3	3435.41	1800.58	-1	<not-identified>
PASAPPATSNPDPAVSR	180417_13	7316	23.47	1145.81	3	3435.41	1800.6	-1	<not-identified>
VWGQGQSPRPENSLER	180417_13	7316	23.47	1145.81	3	3435.41	1595.5	-1	<not-identified>
GSQVLESTPPPHVMR	180417_13	7344	23.52	978.662	4	3911.63	2276.8	-1	<not-identified>
PASAPPATSNPDPAVSR	180417_13	7344	23.52	978.662	4	3911.63	2276.81	-1	<not-identified>
VWGQGQSPRPENSLER	180417_13	7344	23.52	978.662	4	3911.63	2071.72	-1	<not-identified>
SVAPMRGGEITAHW	180417_13	7359	23.55	1145.81	3	3435.41	1923.67	-1	<not-identified>
GSQVLESTPPPHVMR	180417_13	7360	23.55	1201.84	3	3603.5	1968.66	33030000	HexNAc3Hex3NeuAc3
PASAPPATSNPDPAVSR	180417_13	7360	23.55	1201.84	3	3603.5	1968.68	33030000	HexNAc3Hex3NeuAc3
VWGQGQSPRPENSLER	180417_13	7360	23.55	1201.84	3	3603.5	1763.59	-1	<not-identified>
VWGQGQSPRPENSLER	180417_13	7447	23.7	983.89	4	3932.54	2092.63	-1	<not-identified>
GSQVLESTPPPHVMR	180417_13	7499	23.8	901.883	4	3604.51	1969.68	-1	<not-identified>
PASAPPATSNPDPAVSR	180417_13	7499	23.8	901.883	4	3604.51	1969.7	33220000	HexNAc3Hex3Fuc2NeuAc2
VWGQGQSPRPENSLER	180417_13	7499	23.8	901.883	4	3604.51	1764.6	-1	<not-identified>
GSQVLESTPPPHVMR	180417_13	7574	23.93	974.404	4	3894.6	2259.76	33040000	HexNAc3Hex3NeuAc4
PASAPPATSNPDPAVSR	180417_13	7574	23.93	974.404	4	3894.6	2259.78	33040000	HexNAc3Hex3NeuAc4
VWGQGQSPRPENSLER	180417_13	7574	23.93	974.404	4	3894.6	2054.69	-1	<not-identified>
PASAPPATSNPDPAVSR	180417_13	7587	23.95	1304.55	3	3911.62	2276.81	-1	<not-identified>
VWGQGQSPRPENSLER	180417_13	7587	23.95	1304.55	3	3911.62	2071.71	-1	<not-identified>
GSQVLESTPPPHVMR	180417_13	7688	24.13	978.661	4	3911.62	2276.79	-1	<not-identified>
PASAPPATSNPDPAVSR	180417_13	7688	24.13	978.661	4	3911.62	2276.81	-1	<not-identified>
VWGQGQSPRPENSLER	180417_13	7688	24.13	978.661	4	3911.62	2071.71	-1	<not-identified>
GSQVLESTPPPHVMR	180417_13	7714	24.18	901.629	4	3603.49	1968.66	-1	<not-identified>
PASAPPATSNPDPAVSR	180417_13	7714	24.18	901.629	4	3603.49	1968.68	33030000	HexNAc3Hex3NeuAc3
VWGQGQSPRPENSLER	180417_13	7714	24.18	901.629	4	3603.49	1763.58	-1	<not-identified>
VWGQGQSPRPENSLER	180417_13	7733	24.22	982.918	4	3928.65	2088.74	-1	<not-identified>
SALQPSPTHSSSNTQR	180417_13	7758	24.27	881.705	3	2643.1	945.279	-1	<not-identified>
GSQVLESTPPPHVMR	180417_13	7796	24.35	1201.84	3	3603.5	1968.67	33030000	HexNAc3Hex3NeuAc3
PASAPPATSNPDPAVSR	180417_13	7796	24.35	1201.84	3	3603.5	1968.69	33030000	HexNAc3Hex3NeuAc3
VWGQGQSPRPENSLER	180417_13	7796	24.35	1201.84	3	3603.5	1763.59	-1	<not-identified>
VWGQGQSPRPENSLER	180417_13	7817	24.38	984.393	4	3934.55	2094.64	-1	<not-identified>
VWGQGQSPRPENSLER	180417_13	7848	24.45	1306.2	3	3916.58	2076.67	-1	<not-identified>
GSQVLESTPPPHVMR	180417_13	7880	24.52	1298.87	3	3894.59	2259.76	33040000	HexNAc3Hex3NeuAc4
PASAPPATSNPDPAVSR	180417_13	7880	24.52	1298.87	3	3894.59	2259.78	33040000	HexNAc3Hex3NeuAc4
VWGQGQSPRPENSLER	180417_13	7880	24.52	1298.87	3	3894.59	2054.68	-1	<not-identified>
VWGQGQSPRPENSLER	180417_13	7886	24.52	1106.43	4	4422.7	2582.79	-1	<not-identified>
GSQVLESTPPPHVMR	180417_13	8006	24.73	974.405	4	3894.6	2259.77	33040000	HexNAc3Hex3NeuAc4
PASAPPATSNPDPAVSR	180417_13	8006	24.73	974.405	4	3894.6	2259.78	33040000	HexNAc3Hex3NeuAc4
VWGQGQSPRPENSLER	180417_13	8006	24.73	974.405	4	3894.6	2054.69	-1	<not-identified>
VWGQGQSPRPENSLER	180417_13	8040	24.78	1149.49	3	3446.45	1606.54	-1	<not-identified>
GSQVLESTPPPHVMR	180417_13	8045	24.8	978.66	4	3911.62	2276.79	-1	<not-identified>
PASAPPATSNPDPAVSR	180417_13	8045	24.8	978.66	4	3911.62	2276.81	-1	<not-identified>
VWGQGQSPRPENSLER	180417_13	8045	24.8	978.66	4	3911.62	2071.71	-1	<not-identified>
GSQVLESTPPPHVMR	180417_13	8056	24.82	1304.53	3	3911.57	2276.74	-1	<not-identified>
PASAPPATSNPDPAVSR	180417_13	8056	24.82	1304.53	3	3911.57	2276.76	-1	<not-identified>
VWGQGQSPRPENSLER	180417_13	8056	24.82	1304.53	3	3911.57	2071.66	-1	<not-identified>
VWGQGQSPRPENSLER	180417_13	8101	24.9	983.165	4	3929.64	2089.73	-1	<not-identified>
LQATLDHTGHTSSK	180417_13	8112	24.92	939.637	4	3755.53	2259.78	33040000	HexNAc3Hex3NeuAc4
LQATLDHTGHTSSK	180417_13	8119	24.93	866.867	4	3464.45	1968.7	33030000	HexNAc3Hex3NeuAc3
GSQVLESTPPPHVMR	180417_13	8123	24.95	901.63	4	3603.5	1968.67	33030000	HexNAc3Hex3NeuAc3
PASAPPATSNPDPAVSR	180417_13	8123	24.95	901.63	4	3603.5	1968.68	33030000	HexNAc3Hex3NeuAc3
VWGQGQSPRPENSLER	180417_13	8123	24.95	901.63	4	3603.5	1763.59	-1	<not-identified>
PASAPPATSNPDPAVSR	180417_13	8146	24.98	901.882	4	3604.51	1969.69	33220000	HexNAc3Hex3Fuc2NeuAc2
VWGQGQSPRPENSLER	180417_13	8146	24.98	901.882	4	3604.51	1764.6	-1	<not-identified>
LQATLDHTGHTSSK	180417_13	8194	25.08	1155.14	3	3463.41	1967.66	-1	<not-identified>
SVAPMRGGEITAHW	180417_13	8200	25.1	994.764	3	2982.28	1470.54	-1	<not-identified>
GSQVLESTPPPHVMR	180417_13	8203	25.1	1201.84	3	3603.5	1968.67	33030000	HexNAc3Hex3NeuAc3
PASAPPATSNPDPAVSR	180417_13	8203	25.1	1201.84	3	3603.5	1968.69	33030000	HexNAc3Hex3NeuAc3
VWGQGQSPRPENSLER	180417_13	8203	25.1	1201.84	3	3603.5	1763.59	-1	<not-identified>
GSQVLESTPPPHVMR	180417_13	8204	25.1	1207.52	3	3620.55	1985.71	-1	<not-identified>
PASAPPATSNPDPAVSR	180417_13	8204	25.1	1207.52	3	3620.55	1985.73	-1	<not-identified>
VWGQGQSPRPENSLER	180417_13	8204	25.1	1207.52	3	3620.55	1780.64	-1	<not-identified>
GSQVLESTPPPHVMR	180417_13	8226	25.15	905.886	4	3620.52	1985.69	-1	<not-identified>
PASAPPATSNPDPAVSR	180417_13	8226	25.15	905.886	4	3620.52	1985.71	-1	<not-identified>
VWGQGQSPRPENSLER	180417_13	8226	25.15	905.886	4	3620.52	1780.61	-1	<not-identified>
VWGQGQSPRPENSLER	180417_13	8247	25.18	911.368	4	3642.45	1802.54	-1	<not-identified>
LQATLDHTGHTSSK	180417_13	8266	25.22	867.113	4	3465.43	1969.68	-1	<not-identified>
GSQVLESTPPPHVMR	180417_13	8303	25.28	974.405	4	3894.6	2259.77	33040000	HexNAc3Hex3NeuAc4
PASAPPATSNPDPAVSR	180417_13	8303	25.28	974.405	4	3894.6	2259.78	33040000	HexNAc3Hex3NeuAc4
VWGQGQSPRPENSLER	180417_13	8303	25.28	974.405	4	3894.6	2054.69	-1	<not-identified>
LQATLDHTGHTSSK	180417_13	8304	25.28	1155.47	3	3464.4	1968.65	-1	<not-identified>
VWGQGQSPRPENSLER	180417_13	8305	25.28	991.931	4	3964.7	2124.79	-1	<not-identified>
GSQVLESTPPPHVMR	180417_13	8310	25.3	1050.79	3	3150.35	1515.52	32020000	HexNAc3Hex2NeuAc2
PASAPPATSNPDPAVSR	180417_13	8310	25.3	1050.79	3	3150.35	1515.54	32020000	HexNAc3Hex2NeuAc2
VWGQGQSPRPENSLER	180417_13	8310	25.3	1050.79	3	3150.35	1310.45	-1	<not-identified>
VWGQGQSPRPENSLER	180417_13	8349	25.37	1085.98	4	4340.9	2500.99	-1	<not-identified>
GSQVLESTPPPHVMR	180417_13	8358	25.38	1101.44	3	3302.3	1667.47	-1	<not-identified>
PASAPPATSNPDPAVSR	180417_13	8358	25.38	1101.44	3	3302.3	1667.49	-1	<not-identified>
VWGQGQSPRPENSLER	180417_13	8368	25.4	1077.22	4	4305.85	2465.94	-1	<not-identified>
GSQVLESTPPPHVMR	180417_13	8392	25.43	1201.84	3	3603.5	1968.67	33030000	HexNAc3Hex3NeuAc3
PASAPPATSNPDPAVSR	180417_13	8392	25.43	1201.84	3	3603.5	1968.69	33030000	HexNAc3Hex3NeuAc3
VWGQGQSPRPENSLER	180417_13	8392	25.43	1201.84	3	3603.5	1763.59	-1	<not-identified>
GSQVLESTPPPHVMR	180417_13	8393	25.43	991.678	4	3963.69	2328.86	-1	<not-identified>
PASAPPATSNPDPAVSR	180417_13	8393	25.43	991.678	4	3963.69	2328.88	-1	<not-identified>
VWGQGQSPRPENSLER	180417_13	8393	25.43	991.678	4	3963.69	2123.78	-1	<not-identified>
VWGQGQSPRPENSLER	180417_13	8398	25.45	1023.45	4	4090.79	2250.88	-1	<not-identified>
GSQVLESTPPPHVMR	180417_13	8409	25.47	1104.81	3	3312.4	1677.57	-1	<not-identified>
PASAPPATSNPDPAVSR	180417_13	8409	25.47	1104.81	3	3312.4	1677.59	33020000	HexNAc3Hex3NeuAc2
VWGQGQSPRPENSLER	180417_13	8409	25.47	1104.81	3	3312.4	1472.49	-1	<not-identified>
GSQVLESTPPPHVMR	180417_13	8415	25.48	828.853	4	3312.39	1677.56	-1	<not-identified>
PASAPPATSNPDPAVSR	180417_13	8415	25.48	828.853	4	3312.39	1677.58	33020000	HexNAc3Hex3NeuAc2
VWGQGQSPRPENSLER	180417_13	8415	25.48	828.853	4	3312.39	1472.48	-1	<not-identified>
PASAPPATSNPDPAVSR	180417_13	8420	25.5	1014.44	4	4054.75	2419.94	-1	<not-identified>
GSQVLESTPPPHVMR	180417_13	8426	25.5	983.095	3	2947.27	1312.44	-1	<not-identified>
PASAPPATSNPDPAVSR	180417_13	8426	25.5	983.095	3	2947.27	1312.46	22020000	HexNAc2Hex2NeuAc2
GSQVLESTPPPHVMR	180417_13	8432	25.52	1101.11	3	3301.31	1666.47	-1	<not-identified>
PASAPPATSNPDPAVSR	180417_13	8432	25.52	1101.11	3	3301.31	1666.49	-1	<not-identified>
GSQVLESTPPPHVMR	180417_13	8445	25.53	901.632	4	3603.51	1968.68	33030000	HexNAc3Hex3NeuAc3
PASAPPATSNPDPAVSR	180417_13	8445	25.53	901.632	4	3603.51	1968.69	33030000	HexNAc3Hex3NeuAc3
VWGQGQSPRPENSLER	180417_13	8445	25.53	901.632	4	3603.51	1763.6	-1	<not-identified>
GSQVLESTPPPHVMR	180417_13	8449	25.55	1008.11	3	3022.3	1387.47	-1	<not-identified>
PASAPPATSNPDPAVSR	180417_13	8449	25.55	1008.11	3	3022.3	1387.49	-1	<not-identified>
VWGQGQSPRPENSLER	180417_13	8449	25.55	1008.11	3	3022.3	1182.39	-1	<not-identified>
GSQVLESTPPPHVMR	180417_13	8507	25.65	953.76	3	2859.26	1224.43	32010000	HexNAc3Hex2NeuAc
PASAPPATSNPDPAVSR	180417_13	8507	25.65	953.76	3	2859.26	1224.45	32010000	HexNAc3Hex2NeuAc
VWGQGQSPRPENSLER	180417_13	8507	25.65	953.76	3	2859.26	1019.36	-1	<not-identified>
VWGQGQSPRPENSLER	180417_13	8523	25.68	1041.96	4	4164.83	2324.92	-1	<not-identified>
VWGQGQSPRPENSLER	180417_13	8524	25.68	1001.95	4	4004.77	2164.86	-1	<not-identified>
VWGQGQSPRPENSLER	180417_13	8528	25.7	907.127	4	3625.49	1785.58	-1	<not-identified>
VWGQGQSPRPENSLER	180417_13	8534	25.7	1028.45	4	4110.77	2270.86	-1	<not-identified>
GSQVLESTPPPHVMR	180417_13	8547	25.73	905.887	4	3620.52	1985.69	-1	<not-identified>
PASAPPATSNPDPAVSR	180417_13	8547	25.73	905.887	4	3620.52	1985.71	-1	<not-identified>
VWGQGQSPRPENSLER	180417_13	8547	25.73	905.887	4	3620.52	1780.61	-1	<not-identified>
GSQVLESTPPPHVMR	180417_13	8560	25.75	1207.51	3	3620.52	1985.69	-1	<not-identified>
PASAPPATSNPDPAVSR	180417_13	8560	25.75	1207.51	3	3620.52	1985.71	-1	<not-identified>
VWGQGQSPRPENSLER	180417_13	8560	25.75	1207.51	3	3620.52	1780.61	-1	<not-identified>
[truncated: 11,765 more rows]

## Sheet: Confirmed glycan compositions
Composition	Mass	Comment	Reported in
HexNAcHex	365.132	fragment
HexNAcNeuAc	494.148	fragment
HexNAcHexNeuAc	656.228
HexNAcHexNeuAcNa	678.21
HexNAc2NeuAc	697.254		ref. 16
HexNAcHexNeuAcAc	698.238
HexNAcHexNeuAcAcNa	720.22
HexNAc2HexNeuAc	859.307	fragment
HexNAc2HexNeuAcAc	901.318	fragment
HexNAcHexNeuAc2	947.323
HexNAcHexNeuAc2Na	979.305
HexNAcHexNeuAcNeuAcAc	989.334		ref. 16
HexNAcHexNeuAcNeuAcAcNa	1011.32
HexNAc2Hex2NeuAc	1021.36	fragment
HexNAcHexNeuAcAc2	1031.34		ref. 16
HexNAc3HexNeuAc	1062.39		ref. 16
HexNAc2Hex2NeuAcAc	1063.37	fragment
HexNAc2Hex2FucNeuAc	1167.42
HexNAc3Hex2NeuAc	1224.44
HexNAcHexNeuAc3	1238.42		ref. 16
HexNAcHexNeuAc2NeuAcAc	1280.43		ref. 16
HexNAcHexNeuAc2NeuAcAcNa	1302.41
HexNAc2Hex2NeuAc2	1312.46
HexNAcHexNeuAcNeuAcAc2	1322.44		ref. 16
HexNAc2Hex3FucNeuAc	1329.47		ref. 16
HexNAc2Hex2NeuAc2Na	1334.44
HexNAcHexNeuAcNeuAcAc2Na	1344.42
HexNAc2Hex2NeuAc2Ac	1354.47
HexNAcHexNeuAcAc3	1364.45		ref. 16
HexNAc3Hex2FucNeuAc	1370.5		ref. 16
HexNAc2Hex2NeuAcNeuAcAcNa	1376.45
HexNAc3Hex3NeuAc	1386.49
HexNAc2Hex2NeuAc2Sulph	1392.42		ref. 16
HexNAc2Hex2NeuAcAc2	1396.48		ref. 16
HexNAc2Hex2NeuAc2SulphNa	1414.39
HexNAc2Hex2NeuAcAc2Na	1418.46
HexNAc2Hex2FucNeuAc2	1458.51		ref. 16
HexNAc2Hex2FucNeuAc2Na	1480.49
HexNAc2Hex2FucNeuAcNeuAcAc	1500.52		ref. 16
HexNAc3Hex2NeuAc2	1515.53
HexNAc2Hex2FucNeuAcNeuAcAcNa	1522.51
HexNAc2Hex2FucNeuAcAc2	1542.53		ref. 16
HexNAc2Hex2NeuAc2NeuAcAc	1645.56
HexNAc3Hex3NeuAc2	1677.59
HexNAc2Hex2NeuAcNeuAcAc2	1687.57
HexNAc3Hex3NeuAc2Na	1699.57
HexNAc4Hex3FucNeuAc	1735.63
HexNAc4Hex4NeuAc	1751.62
HexNAc3Hex3FucNeuAc2	1823.65		ref. 16
HexNAc3Hex3FucNeuAc2Na	1845.63
HexNAc3Hex3Fuc2NeuAc2	1969.7
HexNAc3Hex3Fuc2NeuAc2Na	1991.69
HexNAc4Hex4NeuAc2	2042.72
HexNAc5Hex5NeuAc	2116.76
HexNAc4Hex4NeuAc3	2333.82
HexNAc5Hex4FucNeuAc2	2391.86
HexNAc5Hex5NeuAc2	2407.85

## Sheet: Glycoforms of AVAVTLQSH
PEPTIDE	FILE						SCANS	RETENTION_TIME(MINUTES)	PRECURSOR	CHARGE	MH+	SUGAR_MASS		SUGAR_ID	SUGAR_NAME
AVAVTLQSH	180417_08	1	1	1	0	0	10117	34.22	791.37	2	1581.73	656.222	656.	11010000	HexNAcHexNeuAc			656	HexNAcHexNeuAc	21
AVAVTLQSH	180420_05	1	1	1	0	0	8009	29.25	791.372	2	1581.74	656.226	656.	11010000	HexNAcHexNeuAc			678	HexNAcHexNeuAcNa	1
AVAVTLQSH	180417_16	1	1	1	0	0	9308	30.65	791.372	2	1581.74	656.226	656.	11010000	HexNAcHexNeuAc			697	HexNAc2NeuAc	6
AVAVTLQSH	180417_27	1	1	1	0	0	9931	33.78	791.372	2	1581.74	656.227	656.	11010000	HexNAcHexNeuAc			698	HexNAcHexNeuAcAc	1
AVAVTLQSH	180420_05	1	1	1	0	0	8229	29.85	791.372	2	1581.74	656.227	656.	11010000	HexNAcHexNeuAc			720	HexNAcHexNeuAcAcNa	1
AVAVTLQSH	180417_06	1	1	1	0	0	9220	32.33	791.373	2	1581.74	656.228	656.	11010000	HexNAcHexNeuAc			947	HexNAcHexNeuAc2	103
AVAVTLQSH	180417_16	1	1	1	0	0	10173	32.7	791.373	2	1581.74	656.228	656.	11010000	HexNAcHexNeuAc			969	HexNAcHexNeuAc2Na	34
AVAVTLQSH	180417_14	1	1	1	0	0	10450	34.95	791.373	2	1581.74	656.228	656.	11010000	HexNAcHexNeuAc			989	HexNAcHexNeuAcNeuAcAc	95
AVAVTLQSH	180417_08	1	1	1	0	0	8323	29.55	791.373	2	1581.74	656.228	656.	11010000	HexNAcHexNeuAc			1011	HexNAcHexNeuAc2AcNa	27
AVAVTLQSH	180417_14	1	1	1	0	0	11062	36.55	791.373	2	1581.74	656.229	656.	11010000	HexNAcHexNeuAc			1031	HexNAcHexNeuAcAc2	8
AVAVTLQSH	180417_08	1	1	1	0	0	9535	32.73	791.373	2	1581.74	656.229	656.	11010000	HexNAcHexNeuAc			1062	HexNAc3HexNeuAc	1
AVAVTLQSH	180417_08	1	1	1	0	0	9109	31.67	791.373	2	1581.74	656.229	656.	11010000	HexNAcHexNeuAc			1167	HexNAc2Hex2FucNeuAc	4
AVAVTLQSH	180417_16	1	1	1	0	0	10490	33.43	791.374	2	1581.74	656.23	656.	11010000	HexNAcHexNeuAc			1224	HexNAc3Hex2NeuAc	4
AVAVTLQSH	180417_14	1	1	1	0	0	9766	33.1	791.374	2	1581.74	656.23	656.	11010000	HexNAcHexNeuAc			1238	HexNAcHexNeuAc3	6
AVAVTLQSH	180417_16	1	1	1	0	0	9930	32.15	791.374	2	1581.74	656.231	656.	11010000	HexNAcHexNeuAc			1280	HexNAcHexNeuAc3Ac	16
AVAVTLQSH	180417_27	1	1	1	0	0	10638	35.7	791.374	2	1581.74	656.231	656.	11010000	HexNAcHexNeuAc			1302	HexNAcHexNeuAc3AcNa	12
AVAVTLQSH	180417_27	1	1	1	0	0	9748	33.28	791.374	2	1581.74	656.231	656.	11010000	HexNAcHexNeuAc			1312	HexNAc2Hex2NeuAc2	75
AVAVTLQSH	180420_20	1	1	1	0	0	8713	31.65	791.374	2	1581.74	656.231	656.	11010000	HexNAcHexNeuAc			1322	HexNAcHexNeuAcNeuAcAc2	45
AVAVTLQSH	180417_08	1	1	1	0	0	8900	31.13	791.375	2	1581.74	656.232	656.	11010000	HexNAcHexNeuAc			1334	HexNAc2Hex2NeuAc2Na	14
AVAVTLQSH	180417_14	1	1	1	0	0	9581	32.6	791.375	2	1581.74	656.232	656.	11010000	HexNAcHexNeuAc			1344	HexNAcHexNeuAc3Ac2Na	14
AVAVTLQSH	180420_05	1	1	1	0	0	7732	28.5	791.375	2	1581.74	656.234	656.	11010000	HexNAcHexNeuAc			1354	HexNAc2Hex2NeuAcNeuAcAc	59
AVAVTLQSH	180417_08	1	1	1	0	0	8947	31.25	802.363	2	1603.72	678.209	678.	11010010	HexNAcHexNeuAcNa			1364	HexNAcHexNeuAcNeuAcAcNeuAcAcAc	3
AVAVTLQSH	180417_16	1	1	1	0	0	11469	35.77	811.884	2	1622.76	697.251	697.	20010000	HexNAc2NeuAc			1370	HexNAc3Hex2FucNeuAc	10
AVAVTLQSH	180417_29	1	1	1	0	0	11264	35.33	811.886	2	1622.76	697.254	697.	20010000	HexNAc2NeuAc			1376	HexNAc2Hex2NeuAc2AcNa	7
AVAVTLQSH	180417_08	1	1	1	0	0	10777	35.92	811.886	2	1622.77	697.255	697.	20010000	HexNAc2NeuAc			1392	HexNAc2Hex2NeuAc2Sulph	8
AVAVTLQSH	180420_22	1	1	1	0	0	10125	34.4	811.886	2	1622.77	697.255	697.	20010000	HexNAc2NeuAc			1396	HexNAc2Hex2NeuAcAc2	61
AVAVTLQSH	180420_20	1	1	1	0	0	9937	35.18	811.887	2	1622.77	697.257	697.	20010000	HexNAc2NeuAc			1414	HexNAc2Hex2NeuAc2SulphNa	7
AVAVTLQSH	180417_06	1	1	1	0	0	10256	35.23	811.888	2	1622.77	697.258	697.	20010000	HexNAc2NeuAc			1418	HexNAc2Hex2NeuAc2Ac2Na	5
AVAVTLQSH	180417_06	1	1	1	0	0	12926	42.58	812.38	2	1623.75	698.243	698.	11011000	HexNAcHexNeuAcAc			1458	HexNAc2Hex2FucNeuAc2	50
AVAVTLQSH	180417_06	1	1	1	0	0	12223	40.62	823.37	2	1645.73	720.224	720.	11011010	HexNAcHexNeuAcAcNa			1480	HexNAc2Hex2FucNeuAc2Na	17
AVAVTLQSH	180417_31	1	1	1	0	0	41880	89.45	936.917	2	1872.83	947.317	947.	11020000	HexNAcHexNeuAc2			1500	HexNAc2Hex2FucNeuAcNeuAcAc	33
AVAVTLQSH	180417_23	1	1	1	0	0	38442	88.15	936.918	2	1872.83	947.319	947.	11020000	HexNAcHexNeuAc2			1522	HexNAc2Hex2FucNeuAc2AcNa	6
AVAVTLQSH	180417_23	1	1	1	0	0	10477	32.5	936.918	2	1872.83	947.319	947.	11020000	HexNAcHexNeuAc2			1542	HexNAc2Hex2FucNeuAcAc2	33
AVAVTLQSH	180417_31	1	1	1	0	0	11365	31.9	936.919	2	1872.83	947.32	947.	11020000	HexNAcHexNeuAc2			1645	HexNAc2Hex2NeuAc2NeuAcAc	6
AVAVTLQSH	180420_07	1	1	1	0	0	8371	28.95	936.919	2	1872.83	947.32	947.	11020000	HexNAcHexNeuAc2			1677	HexNAc3Hex3NeuAc2	7
AVAVTLQSH	180417_23	1	1	1	0	0	1204	3.67	936.919	2	1872.83	947.321	947.	11020000	HexNAcHexNeuAc2			1687	HexNAc2Hex2NeuAc3Ac2	3
AVAVTLQSH	180420_05	1	1	1	0	0	8069	29.42	936.919	2	1872.83	947.321	947.	11020000	HexNAcHexNeuAc2			1735	HexNAc4Hex3FucNeuAc	1
AVAVTLQSH	180417_15	1	1	1	0	0	11699	32.75	624.949	3	1872.83	947.322	947.	11020000	HexNAcHexNeuAc2			1823	HexNAc3Hex3FucNeuAc2	4
AVAVTLQSH	180420_03	1	1	1	0	0	9280	32.22	936.92	2	1872.83	947.322	947.	11020000	HexNAcHexNeuAc2			1845	HexNAc3Hex3FucNeuAc2Na	1
AVAVTLQSH	180417_29	1	1	1	0	0	9496	31.28	936.92	2	1872.83	947.322	947.	11020000	HexNAcHexNeuAc2			1969	HexNAc3Hex3Fuc2NeuAc2	6
AVAVTLQSH	180420_12	1	1	1	0	0	9113	31.43	936.92	2	1872.83	947.322	947.	11020000	HexNAcHexNeuAc2			1991	HexNAc3Hex3Fuc2NeuAc2Na	7
AVAVTLQSH	180417_07	1	1	1	0	0	10573	31.05	624.949	3	1872.83	947.323	947.	11020000	HexNAcHexNeuAc2			2042	HexNAc4Hex4NeuAc2	2
AVAVTLQSH	180417_05	1	1	1	0	0	11428	31.87	624.949	3	1872.83	947.323	947.	11020000	HexNAcHexNeuAc2			2333	HexNAc4Hex4NeuAc3	7
AVAVTLQSH	180417_10	1	1	1	0	0	10030	30.62	936.92	2	1872.83	947.323	947.	11020000	HexNAcHexNeuAc2			2391	HexNAc5Hex4FucNeuAc2	1
AVAVTLQSH	180417_27	1	1	1	0	0	10082	34.2	936.92	2	1872.83	947.323	947.	11020000	HexNAcHexNeuAc2
AVAVTLQSH	180417_05	1	1	1	0	0	11675	32.4	624.949	3	1872.83	947.323	947.	11020000	HexNAcHexNeuAc2
AVAVTLQSH	180417_26	1	1	1	0	0	12381	33.28	624.949	3	1872.83	947.323	947.	11020000	HexNAcHexNeuAc2
AVAVTLQSH	180420_02	1	1	1	0	0	10202	31.1	624.949	3	1872.83	947.323	947.	11020000	HexNAcHexNeuAc2
AVAVTLQSH	180417_07	1	1	1	0	0	10878	31.63	624.949	3	1872.83	947.323	947.	11020000	HexNAcHexNeuAc2
AVAVTLQSH	180417_26	1	1	1	0	0	12096	32.73	624.949	3	1872.83	947.323	947.	11020000	HexNAcHexNeuAc2
AVAVTLQSH	180417_31	1	1	1	0	0	10033	29.05	936.921	2	1872.83	947.324	947.	11020000	HexNAcHexNeuAc2
AVAVTLQSH	180417_31	1	1	1	0	0	11051	31.28	936.921	2	1872.83	947.324	947.	11020000	HexNAcHexNeuAc2
AVAVTLQSH	180417_13	1	1	1	0	0	12008	32.35	624.95	3	1872.83	947.324	947.	11020000	HexNAcHexNeuAc2
AVAVTLQSH	180417_31	1	1	1	0	0	10164	29.32	936.921	2	1872.83	947.324	947.	11020000	HexNAcHexNeuAc2
AVAVTLQSH	180420_07	1	1	1	0	0	8442	29.1	936.921	2	1872.83	947.324	947.	11020000	HexNAcHexNeuAc2
AVAVTLQSH	180417_08	1	1	1	0	2	115	0.45	936.921	2	1872.83	947.324	947.	11020000	HexNAcHexNeuAc2
AVAVTLQSH	180417_16	1	1	1	0	0	10167	32.68	936.921	2	1872.83	947.324	947.	11020000	HexNAcHexNeuAc2
AVAVTLQSH	180422_02	1	1	1	0	0	9791	32.32	936.921	2	1872.83	947.324	947.	11020000	HexNAcHexNeuAc2
AVAVTLQSH	180420_05	1	1	1	0	0	8264	29.93	936.921	2	1872.83	947.325	947.	11020000	HexNAcHexNeuAc2
AVAVTLQSH	180420_19_i	1	1	1	0	0	9794	31.58	624.95	3	1872.83	947.325	947.	11020000	HexNAcHexNeuAc2
AVAVTLQSH	180417_27	1	1	1	0	0	9730	33.22	936.921	2	1872.83	947.325	947.	11020000	HexNAcHexNeuAc2
AVAVTLQSH	180417_27	1	1	1	0	0	9911	33.73	936.921	2	1872.83	947.325	947.	11020000	HexNAcHexNeuAc2
AVAVTLQSH	180422_11	1	1	1	0	0	9437	31.08	936.921	2	1872.83	947.325	947.	11020000	HexNAcHexNeuAc2
AVAVTLQSH	180417_31	1	1	1	0	0	10359	29.75	936.921	2	1872.84	947.325	947.	11020000	HexNAcHexNeuAc2
AVAVTLQSH	180420_05	1	1	1	0	0	9031	32	936.921	2	1872.84	947.325	947.	11020000	HexNAcHexNeuAc2
AVAVTLQSH	180417_08	1	1	1	0	0	10307	34.7	936.921	2	1872.84	947.325	947.	11020000	HexNAcHexNeuAc2
AVAVTLQSH	180417_36	1	1	1	0	0	11367	32.9	624.95	3	1872.84	947.325	947.	11020000	HexNAcHexNeuAc2
AVAVTLQSH	180417_39	1	1	1	0	0	9097	29.22	936.921	2	1872.84	947.325	947.	11020000	HexNAcHexNeuAc2
AVAVTLQSH	180420_05	1	1	1	0	0	8641	30.97	936.921	2	1872.84	947.325	947.	11020000	HexNAcHexNeuAc2
AVAVTLQSH	180417_08	1	1	1	0	0	9412	32.43	936.921	2	1872.84	947.325	947.	11020000	HexNAcHexNeuAc2
AVAVTLQSH	180420_03	1	1	1	0	0	8919	31.2	936.921	2	1872.84	947.325	947.	11020000	HexNAcHexNeuAc2
AVAVTLQSH	180417_23	1	1	1	0	0	9458	30.05	936.921	2	1872.84	947.325	947.	11020000	HexNAcHexNeuAc2
AVAVTLQSH	180420_05	1	1	1	0	0	8444	30.45	936.921	2	1872.84	947.325	947.	11020000	HexNAcHexNeuAc2
AVAVTLQSH	180420_14	1	1	1	0	0	8816	29.97	936.921	2	1872.84	947.325	947.	11020000	HexNAcHexNeuAc2
AVAVTLQSH	180417_06	1	1	1	0	0	9335	32.65	936.921	2	1872.84	947.325	947.	11020000	HexNAcHexNeuAc2
AVAVTLQSH	180417_08	1	1	1	0	0	9200	31.92	936.921	2	1872.84	947.325	947.	11020000	HexNAcHexNeuAc2
AVAVTLQSH	180417_10	1	1	1	0	0	9743	29.98	936.921	2	1872.84	947.325	947.	11020000	HexNAcHexNeuAc2
AVAVTLQSH	180417_14	1	1	1	0	0	9700	32.93	936.921	2	1872.84	947.325	947.	11020000	HexNAcHexNeuAc2
AVAVTLQSH	180417_29	1	1	1	0	0	9715	31.82	936.921	2	1872.84	947.325	947.	11020000	HexNAcHexNeuAc2
AVAVTLQSH	180420_12	1	1	1	0	0	9312	31.93	936.921	2	1872.84	947.325	947.	11020000	HexNAcHexNeuAc2
AVAVTLQSH	180420_22	1	1	1	0	0	8565	30.35	936.921	2	1872.84	947.325	947.	11020000	HexNAcHexNeuAc2
AVAVTLQSH	180417_06	1	1	1	0	0	9530	33.18	936.921	2	1872.84	947.325	947.	11020000	HexNAcHexNeuAc2
AVAVTLQSH	180417_16	1	1	1	0	0	10406	33.25	936.921	2	1872.84	947.325	947.	11020000	HexNAcHexNeuAc2
AVAVTLQSH	180420_05	1	1	1	0	0	8840	31.48	936.921	2	1872.84	947.325	947.	11020000	HexNAcHexNeuAc2
AVAVTLQSH	180420_20	1	1	1	0	0	9017	32.58	936.921	2	1872.84	947.325	947.	11020000	HexNAcHexNeuAc2
AVAVTLQSH	180417_16	1	1	1	0	0	9934	32.17	936.922	2	1872.84	947.326	947.	11020000	HexNAcHexNeuAc2
AVAVTLQSH	180420_14	1	1	1	0	0	9038	30.52	936.922	2	1872.84	947.326	947.	11020000	HexNAcHexNeuAc2
AVAVTLQSH	180420_20	1	1	1	0	0	8630	31.4	936.922	2	1872.84	947.326	947.	11020000	HexNAcHexNeuAc2
AVAVTLQSH	180420_20	1	1	1	0	0	8788	31.9	936.922	2	1872.84	947.326	947.	11020000	HexNAcHexNeuAc2
AVAVTLQSH	180420_29	1	1	1	0	0	9420	32	936.922	2	1872.84	947.326	947.	11020000	HexNAcHexNeuAc2
AVAVTLQSH	180420_22	1	1	1	0	0	8774	30.88	936.922	2	1872.84	947.326	947.	11020000	HexNAcHexNeuAc2
AVAVTLQSH	180422_04	1	1	1	0	0	8714	30.43	936.922	2	1872.84	947.326	947.	11020000	HexNAcHexNeuAc2
AVAVTLQSH	180417_39	1	1	1	0	0	9357	29.73	936.922	2	1872.84	947.326	947.	11020000	HexNAcHexNeuAc2
AVAVTLQSH	180420_20	1	1	1	0	0	8984	32.48	936.922	2	1872.84	947.326	947.	11020000	HexNAcHexNeuAc2
AVAVTLQSH	180417_14	1	1	1	0	0	9892	33.45	936.922	2	1872.84	947.326	947.	11020000	HexNAcHexNeuAc2
AVAVTLQSH	180417_23	1	1	1	0	0	217	0.48	936.922	2	1872.84	947.326	947.	11020000	HexNAcHexNeuAc2
AVAVTLQSH	180420_31	1	1	1	0	0	9111	30.2	936.922	2	1872.84	947.326	947.	11020000	HexNAcHexNeuAc2
AVAVTLQSH	180417_23	1	1	1	0	0	9368	29.83	936.922	2	1872.84	947.327	947.	11020000	HexNAcHexNeuAc2
AVAVTLQSH	180422_11	1	1	1	0	0	9654	31.62	936.922	2	1872.84	947.327	947.	11020000	HexNAcHexNeuAc2
AVAVTLQSH	180420_33	1	1	1	0	0	10108	28.95	936.922	2	1872.84	947.327	947.	11020000	HexNAcHexNeuAc2
AVAVTLQSH	180422_06	1	1	1	0	0	10566	30.33	936.922	2	1872.84	947.327	947.	11020000	HexNAcHexNeuAc2
AVAVTLQSH	180417_16	1	1	1	0	0	11616	36.1	936.922	2	1872.84	947.327	947.	11020000	HexNAcHexNeuAc2
AVAVTLQSH	180422_02	1	1	1	0	0	9573	31.77	936.922	2	1872.84	947.327	947.	11020000	HexNAcHexNeuAc2
AVAVTLQSH	180420_03	1	1	1	0	0	9095	31.72	936.922	2	1872.84	947.327	947.	11020000	HexNAcHexNeuAc2
AVAVTLQSH	180417_29	1	1	1	0	0	10192	32.88	936.922	2	1872.84	947.327	947.	11020000	HexNAcHexNeuAc2
AVAVTLQSH	180420_24	1	1	1	0	0	9357	30.7	936.922	2	1872.84	947.327	947.	11020000	HexNAcHexNeuAc2
AVAVTLQSH	180417_29	1	1	1	0	0	9956	32.37	936.922	2	1872.84	947.328	947.	11020000	HexNAcHexNeuAc2
AVAVTLQSH	180420_24	1	1	1	0	0	9850	31.77	936.923	2	1872.84	947.328	947.	11020000	HexNAcHexNeuAc2
AVAVTLQSH	180417_06	1	1	1	0	0	9149	32.13	936.923	2	1872.84	947.328	947.	11020000	HexNAcHexNeuAc2
AVAVTLQSH	180417_37	1	1	1	0	0	10525	32.98	936.923	2	1872.84	947.328	947.	11020000	HexNAcHexNeuAc2
AVAVTLQSH	180420_29	1	1	1	0	0	9217	31.47	936.923	2	1872.84	947.328	947.	11020000	HexNAcHexNeuAc2
AVAVTLQSH	180417_23	1	1	1	0	0	10251	31.93	936.923	2	1872.84	947.328	947.	11020000	HexNAcHexNeuAc2
AVAVTLQSH	180417_23	1	1	1	0	0	39005	89.28	936.923	2	1872.84	947.328	947.	11020000	HexNAcHexNeuAc2
AVAVTLQSH	180417_16	1	1	1	0	0	10657	33.82	936.923	2	1872.84	947.328	947.	11020000	HexNAcHexNeuAc2
AVAVTLQSH	180420_24	1	1	1	0	0	9611	31.22	936.923	2	1872.84	947.328	947.	11020000	HexNAcHexNeuAc2
AVAVTLQSH	180417_08	1	1	1	0	0	8999	31.38	936.923	2	1872.84	947.329	947.	11020000	HexNAcHexNeuAc2
AVAVTLQSH	180417_14	1	1	1	0	0	9520	32.43	936.923	2	1872.84	947.329	947.	11020000	HexNAcHexNeuAc2
AVAVTLQSH	180417_08	1	1	1	0	0	9616	32.95	936.923	2	1872.84	947.329	947.	11020000	HexNAcHexNeuAc2
AVAVTLQSH	180417_08	1	1	1	0	0	950	3.63	936.923	2	1872.84	947.329	947.	11020000	HexNAcHexNeuAc2
AVAVTLQSH	180417_10	1	1	1	0	0	9977	30.5	936.923	2	1872.84	947.329	947.	11020000	HexNAcHexNeuAc2
AVAVTLQSH	180420_20	1	1	1	0	0	9034	32.62	936.923	2	1872.84	947.329	947.	11020000	HexNAcHexNeuAc2
AVAVTLQSH	180417_16	1	1	1	0	0	11325	35.43	936.924	2	1872.84	947.33	947.	11020000	HexNAcHexNeuAc2
AVAVTLQSH	180417_31	1	1	1	0	0	10711	30.53	936.924	2	1872.84	947.33	947.	11020000	HexNAcHexNeuAc2
AVAVTLQSH	180417_23	1	1	1	0	0	10613	32.82	936.924	2	1872.84	947.33	947.	11020000	HexNAcHexNeuAc2
AVAVTLQSH	180417_37	1	1	1	0	0	10310	32.45	936.924	2	1872.84	947.33	947.	11020000	HexNAcHexNeuAc2
AVAVTLQSH	180420_22	1	1	1	0	0	8379	29.83	936.924	2	1872.84	947.33	947.	11020000	HexNAcHexNeuAc2
AVAVTLQSH	180422_04	1	1	1	0	0	8945	30.95	936.924	2	1872.84	947.33	947.	11020000	HexNAcHexNeuAc2
AVAVTLQSH	180420_14	1	1	1	0	0	9569	31.72	936.924	2	1872.84	947.33	947.	11020000	HexNAcHexNeuAc2
AVAVTLQSH	180422_11	1	1	1	0	0	9880	32.18	936.924	2	1872.84	947.331	947.	11020000	HexNAcHexNeuAc2
AVAVTLQSH	180417_10	1	1	1	0	0	10206	31.03	936.924	2	1872.84	947.331	947.	11020000	HexNAcHexNeuAc2
AVAVTLQSH	180420_22	1	1	1	0	0	8984	31.43	936.925	2	1872.84	947.332	947.	11020000	HexNAcHexNeuAc2
AVAVTLQSH	180422_13	1	1	1	0	0	9520	30.58	936.925	2	1872.84	947.332	947.	11020000	HexNAcHexNeuAc2
AVAVTLQSH	180420_24	1	1	1	0	0	9102	30.15	936.925	2	1872.84	947.332	947.	11020000	HexNAcHexNeuAc2
AVAVTLQSH	180417_06	1	1	1	0	0	9259	32.43	947.908	2	1894.81	969.298	969.	11020010	HexNAcHexNeuAc2Na
AVAVTLQSH	180417_10	1	1	1	0	0	9965	30.48	947.909	2	1894.81	969.301	969.	11020010	HexNAcHexNeuAc2Na
AVAVTLQSH	180417_10	1	1	1	0	0	9733	29.95	947.91	2	1894.81	969.302	969.	11020010	HexNAcHexNeuAc2Na
AVAVTLQSH	180417_39	1	1	1	0	0	9073	29.17	947.911	2	1894.81	969.304	969.	11020010	HexNAcHexNeuAc2Na
AVAVTLQSH	180417_39	1	1	1	0	0	9344	29.72	947.911	2	1894.81	969.304	969.	11020010	HexNAcHexNeuAc2Na
AVAVTLQSH	180420_05	1	1	1	0	0	8277	29.97	947.911	2	1894.82	969.305	969.	11020010	HexNAcHexNeuAc2Na
AVAVTLQSH	180417_23	1	1	1	0	0	9556	30.32	947.912	2	1894.82	969.306	969.	11020010	HexNAcHexNeuAc2Na
AVAVTLQSH	180417_31	1	1	1	0	0	10272	29.55	947.912	2	1894.82	969.306	969.	11020010	HexNAcHexNeuAc2Na
AVAVTLQSH	180417_07	1	1	1	0	0	10811	31.5	632.277	3	1894.82	969.306	969.	11020010	HexNAcHexNeuAc2Na
AVAVTLQSH	180417_08	1	1	1	0	0	9026	31.45	947.912	2	1894.82	969.306	969.	11020010	HexNAcHexNeuAc2Na
AVAVTLQSH	180417_16	1	1	1	0	0	9912	32.1	947.912	2	1894.82	969.306	969.	11020010	HexNAcHexNeuAc2Na
AVAVTLQSH	180420_14	1	1	1	0	0	9048	30.53	947.912	2	1894.82	969.306	969.	11020010	HexNAcHexNeuAc2Na
AVAVTLQSH	180417_23	1	1	1	0	0	10227	31.88	947.912	2	1894.82	969.306	969.	11020010	HexNAcHexNeuAc2Na
AVAVTLQSH	180417_29	1	1	1	0	0	9726	31.83	947.912	2	1894.82	969.306	969.	11020010	HexNAcHexNeuAc2Na
AVAVTLQSH	180417_29	1	1	1	0	0	10007	32.47	947.912	2	1894.82	969.306	969.	11020010	HexNAcHexNeuAc2Na
AVAVTLQSH	180417_16	1	1	1	0	0	10139	32.63	947.912	2	1894.82	969.306	969.	11020010	HexNAcHexNeuAc2Na
AVAVTLQSH	180420_05	1	1	1	0	0	8462	30.5	947.912	2	1894.82	969.307	969.	11020010	HexNAcHexNeuAc2Na
AVAVTLQSH	180417_08	1	1	1	0	0	8819	30.92	947.912	2	1894.82	969.307	969.	11020010	HexNAcHexNeuAc2Na
AVAVTLQSH	180417_08	1	1	1	0	0	9220	31.97	947.912	2	1894.82	969.307	969.	11020010	HexNAcHexNeuAc2Na
AVAVTLQSH	180417_08	1	1	1	0	0	9638	33.02	947.912	2	1894.82	969.307	969.	11020010	HexNAcHexNeuAc2Na
AVAVTLQSH	180422_04	1	1	1	0	0	8923	30.9	947.912	2	1894.82	969.308	969.	11020010	HexNAcHexNeuAc2Na
AVAVTLQSH	180420_22	1	1	1	0	0	8758	30.83	947.913	2	1894.82	969.308	969.	11020010	HexNAcHexNeuAc2Na
AVAVTLQSH	180420_22	1	1	1	0	0	8547	30.32	947.913	2	1894.82	969.308	969.	11020010	HexNAcHexNeuAc2Na
AVAVTLQSH	180417_29	1	1	1	0	0	9499	31.3	947.913	2	1894.82	969.308	969.	11020010	HexNAcHexNeuAc2Na
AVAVTLQSH	180417_23	1	1	1	0	0	1221	3.72	947.913	2	1894.82	969.308	969.	11020010	HexNAcHexNeuAc2Na
AVAVTLQSH	180417_27	1	1	1	0	0	9863	33.6	947.913	2	1894.82	969.309	969.	11020010	HexNAcHexNeuAc2Na
AVAVTLQSH	180417_08	1	1	1	0	0	10086	34.13	947.913	2	1894.82	969.309	969.	11020010	HexNAcHexNeuAc2Na
AVAVTLQSH	180417_16	1	1	1	0	0	10368	33.17	947.914	2	1894.82	969.31	969.	11020010	HexNAcHexNeuAc2Na
AVAVTLQSH	180417_23	1	1	1	0	0	9790	30.85	947.914	2	1894.82	969.31	969.	11020010	HexNAcHexNeuAc2Na
AVAVTLQSH	180417_23	1	1	1	0	0	10008	31.37	947.914	2	1894.82	969.311	969.	11020010	HexNAcHexNeuAc2Na
AVAVTLQSH	180417_08	1	1	1	0	0	10703	35.72	947.914	2	1894.82	969.311	969.	11020010	HexNAcHexNeuAc2Na
AVAVTLQSH	180417_14	1	1	1	0	0	9614	32.68	947.915	2	1894.82	969.313	969.	11020010	HexNAcHexNeuAc2Na
AVAVTLQSH	180417_23	1	1	1	0	0	9348	29.78	947.915	2	1894.82	969.313	969.	11020010	HexNAcHexNeuAc2Na
AVAVTLQSH	180417_31	1	1	1	0	0	10022	29.02	947.916	2	1894.82	969.314	969.	11020010	HexNAcHexNeuAc2Na
AVAVTLQSH	180417_37	1	1	1	0	0	13562	40.1	957.922	2	1914.84	989.326	989.	11021000	HexNAcHexNeuAcNeuAcAc
AVAVTLQSH	180420_24	1	1	1	0	0	13328	38.45	957.922	2	1914.84	989.328	989.	11021000	HexNAcHexNeuAcNeuAcAc
AVAVTLQSH	180420_22	1	1	1	0	0	9950	33.92	957.923	2	1914.84	989.328	989.	11021000	HexNAcHexNeuAcNeuAcAc
AVAVTLQSH	180417_31	1	1	1	0	0	11002	31.18	957.923	2	1914.84	989.329	989.	11021000	HexNAcHexNeuAcNeuAcAc
AVAVTLQSH	180417_08	1	1	1	0	0	13819	43.37	957.924	2	1914.84	989.33	989.	11021000	HexNAcHexNeuAcNeuAcAc
AVAVTLQSH	180417_16	1	1	1	0	0	14450	42.5	957.924	2	1914.84	989.33	989.	11021000	HexNAcHexNeuAcNeuAcAc
AVAVTLQSH	180417_23	1	1	1	0	0	12693	37.35	957.924	2	1914.84	989.331	989.	11021000	HexNAcHexNeuAcNeuAcAc
AVAVTLQSH	180417_06	1	1	1	0	0	12900	42.52	957.924	2	1914.84	989.331	989.	11021000	HexNAcHexNeuAcNeuAcAc
AVAVTLQSH	180420_24	1	1	1	0	0	13620	39	957.924	2	1914.84	989.331	989.	11021000	HexNAcHexNeuAcNeuAcAc
AVAVTLQSH	180422_11	1	1	1	0	0	12626	38.72	957.924	2	1914.84	989.331	989.	11021000	HexNAcHexNeuAcNeuAcAc
AVAVTLQSH	180420_20	1	1	1	0	0	11249	38.85	957.924	2	1914.84	989.331	989.	11021000	HexNAcHexNeuAcNeuAcAc
AVAVTLQSH	180422_04	1	1	1	0	0	13603	41.17	957.925	2	1914.84	989.332	989.	11021000	HexNAcHexNeuAcNeuAcAc
AVAVTLQSH	180417_23	1	1	1	0	0	10278	32	957.925	2	1914.84	989.333	989.	11021000	HexNAcHexNeuAcNeuAcAc
AVAVTLQSH	180417_29	1	1	1	0	0	10603	33.83	957.925	2	1914.84	989.333	989.	11021000	HexNAcHexNeuAcNeuAcAc
AVAVTLQSH	180420_24	1	1	1	0	0	13030	37.92	957.925	2	1914.84	989.333	989.	11021000	HexNAcHexNeuAcNeuAcAc
AVAVTLQSH	180417_16	1	1	1	0	0	11242	35.23	957.925	2	1914.84	989.333	989.	11021000	HexNAcHexNeuAcNeuAcAc
AVAVTLQSH	180417_27	1	1	1	0	0	13173	42.22	957.925	2	1914.84	989.333	989.	11021000	HexNAcHexNeuAcNeuAcAc
AVAVTLQSH	180417_08	1	1	1	0	0	9878	33.6	957.925	2	1914.84	989.333	989.	11021000	HexNAcHexNeuAcNeuAcAc
AVAVTLQSH	180417_14	1	1	1	0	0	12683	40.65	957.925	2	1914.84	989.333	989.	11021000	HexNAcHexNeuAcNeuAcAc
AVAVTLQSH	180417_27	1	1	1	0	0	10661	35.77	957.925	2	1914.84	989.333	989.	11021000	HexNAcHexNeuAcNeuAcAc
AVAVTLQSH	180420_05	1	1	1	0	0	12741	41.45	957.925	2	1914.84	989.334	989.	11021000	HexNAcHexNeuAcNeuAcAc
AVAVTLQSH	180420_02	1	1	1	0	0	13712	39.13	638.953	3	1914.84	989.334	989.	11021000	HexNAcHexNeuAcNeuAcAc
AVAVTLQSH	180417_08	1	1	1	0	0	13216	41.93	957.926	2	1914.84	989.334	989.	11021000	HexNAcHexNeuAcNeuAcAc
AVAVTLQSH	180420_05	1	1	1	0	0	11308	37.9	957.926	2	1914.84	989.334	989.	11021000	HexNAcHexNeuAcNeuAcAc
AVAVTLQSH	180422_04	1	1	1	0	0	12471	38.78	957.926	2	1914.84	989.334	989.	11021000	HexNAcHexNeuAcNeuAcAc
AVAVTLQSH	180417_06	1	1	1	0	0	12310	40.87	957.926	2	1914.84	989.334	989.	11021000	HexNAcHexNeuAcNeuAcAc
AVAVTLQSH	180420_14	1	1	1	0	0	9859	32.38	957.926	2	1914.84	989.334	989.	11021000	HexNAcHexNeuAcNeuAcAc
AVAVTLQSH	180417_05	1	1	1	0	0	15527	40.05	638.953	3	1914.84	989.334	989.	11021000	HexNAcHexNeuAcNeuAcAc
AVAVTLQSH	180417_07	1	1	1	0	0	12098	33.95	638.953	3	1914.84	989.334	989.	11021000	HexNAcHexNeuAcNeuAcAc
AVAVTLQSH	180417_08	1	1	1	0	0	9934	33.73	957.926	2	1914.84	989.334	989.	11021000	HexNAcHexNeuAcNeuAcAc
AVAVTLQSH	180420_03	1	1	1	0	0	11686	39.07	957.926	2	1914.84	989.334	989.	11021000	HexNAcHexNeuAcNeuAcAc
AVAVTLQSH	180420_24	1	1	1	0	0	10200	32.53	957.926	2	1914.84	989.334	989.	11021000	HexNAcHexNeuAcNeuAcAc
AVAVTLQSH	180417_07	1	1	1	0	0	15305	39.93	638.953	3	1914.84	989.334	989.	11021000	HexNAcHexNeuAcNeuAcAc
AVAVTLQSH	180420_19_i	1	1	1	0	0	13140	39.23	638.953	3	1914.84	989.334	989.	11021000	HexNAcHexNeuAcNeuAcAc
AVAVTLQSH	180417_08	1	1	1	0	0	12551	40.32	957.926	2	1914.84	989.334	989.	11021000	HexNAcHexNeuAcNeuAcAc
AVAVTLQSH	180420_22	1	1	1	0	0	9690	33.25	957.926	2	1914.84	989.335	989.	11021000	HexNAcHexNeuAcNeuAcAc
AVAVTLQSH	180417_07	1	1	1	0	0	15591	40.47	638.953	3	1914.84	989.335	989.	11021000	HexNAcHexNeuAcNeuAcAc
AVAVTLQSH	180417_14	1	1	1	0	0	12890	41.18	957.926	2	1914.84	989.335	989.	11021000	HexNAcHexNeuAcNeuAcAc
AVAVTLQSH	180417_27	1	1	1	0	0	12954	41.62	957.926	2	1914.84	989.335	989.	11021000	HexNAcHexNeuAcNeuAcAc
AVAVTLQSH	180417_39	1	1	1	0	0	13158	37.53	957.926	2	1914.84	989.335	989.	11021000	HexNAcHexNeuAcNeuAcAc
AVAVTLQSH	180420_22	1	1	1	0	0	11498	37.95	957.926	2	1914.85	989.335	989.	11021000	HexNAcHexNeuAcNeuAcAc
AVAVTLQSH	180417_08	1	1	1	0	0	10344	34.8	957.926	2	1914.85	989.335	989.	11021000	HexNAcHexNeuAcNeuAcAc
AVAVTLQSH	180420_29	1	1	1	0	0	12071	38.9	957.926	2	1914.85	989.335	989.	11021000	HexNAcHexNeuAcNeuAcAc
AVAVTLQSH	180417_29	1	1	1	0	0	13153	39.58	957.926	2	1914.85	989.335	989.	11021000	HexNAcHexNeuAcNeuAcAc
AVAVTLQSH	180420_05	1	1	1	0	0	9233	32.55	957.926	2	1914.85	989.335	989.	11021000	HexNAcHexNeuAcNeuAcAc
AVAVTLQSH	180417_08	1	1	1	0	0	12780	40.87	957.926	2	1914.85	989.335	989.	11021000	HexNAcHexNeuAcNeuAcAc
AVAVTLQSH	180417_16	1	1	1	0	0	14195	41.93	957.926	2	1914.85	989.335	989.	11021000	HexNAcHexNeuAcNeuAcAc
AVAVTLQSH	180417_26	1	1	1	0	0	16381	41.1	638.953	3	1914.85	989.335	989.	11021000	HexNAcHexNeuAcNeuAcAc
AVAVTLQSH	180420_05	1	1	1	0	0	11761	39.03	957.926	2	1914.85	989.335	989.	11021000	HexNAcHexNeuAcNeuAcAc
AVAVTLQSH	180420_22	1	1	1	0	0	11912	39	957.926	2	1914.85	989.335	989.	11021000	HexNAcHexNeuAcNeuAcAc
AVAVTLQSH	180417_29	1	1	1	0	0	13399	40.15	957.926	2	1914.85	989.335	989.	11021000	HexNAcHexNeuAcNeuAcAc
AVAVTLQSH	180417_08	1	1	1	0	0	12322	39.78	957.926	2	1914.85	989.335	989.	11021000	HexNAcHexNeuAcNeuAcAc
AVAVTLQSH	180420_14	1	1	1	0	0	12499	38.35	957.926	2	1914.85	989.335	989.	11021000	HexNAcHexNeuAcNeuAcAc
AVAVTLQSH	180417_31	1	1	1	0	0	13587	36.2	957.927	2	1914.85	989.336	989.	11021000	HexNAcHexNeuAcNeuAcAc
AVAVTLQSH	180417_16	1	1	1	0	0	13725	40.87	957.927	2	1914.85	989.336	989.	11021000	HexNAcHexNeuAcNeuAcAc
AVAVTLQSH	180420_22	1	1	1	0	0	11702	38.47	957.927	2	1914.85	989.336	989.	11021000	HexNAcHexNeuAcNeuAcAc
AVAVTLQSH	180417_08	1	1	1	0	0	10139	34.27	957.927	2	1914.85	989.336	989.	11021000	HexNAcHexNeuAcNeuAcAc
AVAVTLQSH	180420_05	1	1	1	0	0	11532	38.45	957.927	2	1914.85	989.336	989.	11021000	HexNAcHexNeuAcNeuAcAc
AVAVTLQSH	180420_31	1	1	1	0	0	12919	38.25	957.927	2	1914.85	989.336	989.	11021000	HexNAcHexNeuAcNeuAcAc
AVAVTLQSH	180422_02	1	1	1	0	0	12451	39.1	957.927	2	1914.85	989.336	989.	11021000	HexNAcHexNeuAcNeuAcAc
AVAVTLQSH	180417_08	1	1	1	0	0	12301	39.73	957.927	2	1914.85	989.336	989.	11021000	HexNAcHexNeuAcNeuAcAc
AVAVTLQSH	180417_16	1	1	1	0	0	11017	34.7	957.927	2	1914.85	989.336	989.	11021000	HexNAcHexNeuAcNeuAcAc
AVAVTLQSH	180417_16	1	1	1	0	0	13964	41.42	957.927	2	1914.85	989.336	989.	11021000	HexNAcHexNeuAcNeuAcAc
AVAVTLQSH	180420_20	1	1	1	0	0	11427	39.37	957.927	2	1914.85	989.336	989.	11021000	HexNAcHexNeuAcNeuAcAc
AVAVTLQSH	180420_22	1	1	1	0	0	9493	32.73	957.927	2	1914.85	989.336	989.	11021000	HexNAcHexNeuAcNeuAcAc
AVAVTLQSH	180417_13	1	1	1	0	0	16196	40.72	638.954	3	1914.85	989.336	989.	11021000	HexNAcHexNeuAcNeuAcAc
AVAVTLQSH	180420_22	1	1	1	0	0	12137	39.57	957.927	2	1914.85	989.336	989.	11021000	HexNAcHexNeuAcNeuAcAc
AVAVTLQSH	180420_31	1	1	1	0	0	12667	37.75	957.927	2	1914.85	989.336	989.	11021000	HexNAcHexNeuAcNeuAcAc
AVAVTLQSH	180420_05	1	1	1	0	0	12522	40.92	957.927	2	1914.85	989.336	989.	11021000	HexNAcHexNeuAcNeuAcAc
AVAVTLQSH	180422_04	1	1	1	0	0	12739	39.35	957.927	2	1914.85	989.336	989.	11021000	HexNAcHexNeuAcNeuAcAc
AVAVTLQSH	180417_15	1	1	1	0	0	16130	41.02	638.954	3	1914.85	989.337	989.	11021000	HexNAcHexNeuAcNeuAcAc
AVAVTLQSH	180420_05	1	1	1	0	0	12300	40.37	957.927	2	1914.85	989.337	989.	11021000	HexNAcHexNeuAcNeuAcAc
AVAVTLQSH	180420_22	1	1	1	0	0	9293	32.23	957.927	2	1914.85	989.337	989.	11021000	HexNAcHexNeuAcNeuAcAc
AVAVTLQSH	180417_28	1	1	1	0	0	15364	38.25	638.954	3	1914.85	989.337	989.	11021000	HexNAcHexNeuAcNeuAcAc
AVAVTLQSH	180417_08	1	1	1	0	0	12998	41.38	957.927	2	1914.85	989.337	989.	11021000	HexNAcHexNeuAcNeuAcAc
AVAVTLQSH	180417_08	1	1	1	0	0	10561	35.37	957.927	2	1914.85	989.337	989.	11021000	HexNAcHexNeuAcNeuAcAc
AVAVTLQSH	180417_29	1	1	1	0	0	10836	34.37	957.927	2	1914.85	989.337	989.	11021000	HexNAcHexNeuAcNeuAcAc
AVAVTLQSH	180420_14	1	1	1	0	0	12754	38.92	957.927	2	1914.85	989.337	989.	11021000	HexNAcHexNeuAcNeuAcAc
AVAVTLQSH	180420_12	1	1	1	0	0	9995	33.67	957.928	2	1914.85	989.338	989.	11021000	HexNAcHexNeuAcNeuAcAc
AVAVTLQSH	180420_22	1	1	1	0	0	12359	40.1	957.928	2	1914.85	989.338	989.	11021000	HexNAcHexNeuAcNeuAcAc
AVAVTLQSH	180417_06	1	1	1	0	0	12124	40.35	957.928	2	1914.85	989.338	989.	11021000	HexNAcHexNeuAcNeuAcAc
AVAVTLQSH	180420_05	1	1	1	0	0	11974	39.53	957.928	2	1914.85	989.338	989.	11021000	HexNAcHexNeuAcNeuAcAc
AVAVTLQSH	180420_04	1	1	1	0	0	12701	37.9	638.954	3	1914.85	989.338	989.	11021000	HexNAcHexNeuAcNeuAcAc
AVAVTLQSH	180417_29	1	1	1	0	0	13919	41.32	957.928	2	1914.85	989.338	989.	11021000	HexNAcHexNeuAcNeuAcAc
AVAVTLQSH	180417_16	1	1	1	0	0	14218	41.98	957.928	2	1914.85	989.338	989.	11021000	HexNAcHexNeuAcNeuAcAc
AVAVTLQSH	180417_39	1	1	1	0	0	13408	38.08	957.928	2	1914.85	989.338	989.	11021000	HexNAcHexNeuAcNeuAcAc
AVAVTLQSH	180422_04	1	1	1	0	0	10001	33.22	957.928	2	1914.85	989.339	989.	11021000	HexNAcHexNeuAcNeuAcAc
AVAVTLQSH	180417_16	1	1	1	0	0	13488	40.32	957.928	2	1914.85	989.339	989.	11021000	HexNAcHexNeuAcNeuAcAc
AVAVTLQSH	180420_05	1	1	1	0	0	9044	32.03	957.928	2	1914.85	989.339	989.	11021000	HexNAcHexNeuAcNeuAcAc
AVAVTLQSH	180420_31	1	1	1	0	0	10299	32.65	957.929	2	1914.85	989.34	989.	11021000	HexNAcHexNeuAcNeuAcAc
AVAVTLQSH	180420_05	1	1	1	0	0	9508	33.32	957.929	2	1914.85	989.341	989.	11021000	HexNAcHexNeuAcNeuAcAc
AVAVTLQSH	180417_29	1	1	1	0	0	11093	34.95	957.929	2	1914.85	989.341	989.	11021000	HexNAcHexNeuAcNeuAcAc
AVAVTLQSH	180420_14	1	1	1	0	0	10081	32.9	957.929	2	1914.85	989.342	989.	11021000	HexNAcHexNeuAcNeuAcAc
AVAVTLQSH	180417_29	1	1	1	0	0	13626	40.67	957.93	2	1914.85	989.342	989.	11021000	HexNAcHexNeuAcNeuAcAc
AVAVTLQSH	180417_29	1	1	1	0	0	14166	41.88	957.93	2	1914.85	989.342	989.	11021000	HexNAcHexNeuAcNeuAcAc
AVAVTLQSH	180417_29	1	1	1	0	0	13625	40.67	968.915	2	1936.82	1011.31	1011	11021010	HexNAcHexNeuAcNeuAcAcNa
AVAVTLQSH	180417_39	1	1	1	0	0	10531	32.17	968.916	2	1936.82	1011.31	1011	11021010	HexNAcHexNeuAcNeuAcAcNa
AVAVTLQSH	180417_08	1	1	1	0	0	12382	39.93	968.916	2	1936.82	1011.31	1011	11021010	HexNAcHexNeuAcNeuAcAcNa
AVAVTLQSH	180417_39	1	1	1	0	0	13201	37.63	968.916	2	1936.82	1011.31	1011	11021010	HexNAcHexNeuAcNeuAcAcNa
AVAVTLQSH	180417_16	1	1	1	0	0	13775	40.98	968.916	2	1936.83	1011.32	1011	11021010	HexNAcHexNeuAcNeuAcAcNa
AVAVTLQSH	180417_29	1	1	1	0	0	10810	34.3	968.917	2	1936.83	1011.32	1011	11021010	HexNAcHexNeuAcNeuAcAcNa
AVAVTLQSH	180417_31	1	1	1	0	0	11012	31.2	968.917	2	1936.83	1011.32	1011	11021010	HexNAcHexNeuAcNeuAcAcNa
AVAVTLQSH	180417_08	1	1	1	0	0	10109	34.18	968.917	2	1936.83	1011.32	1011	11021010	HexNAcHexNeuAcNeuAcAcNa
AVAVTLQSH	180417_08	1	1	1	0	0	12616	40.48	968.917	2	1936.83	1011.32	1011	11021010	HexNAcHexNeuAcNeuAcAcNa
AVAVTLQSH	180417_23	1	1	1	0	0	12720	37.4	968.917	2	1936.83	1011.32	1011	11021010	HexNAcHexNeuAcNeuAcAcNa
AVAVTLQSH	180417_08	1	1	1	0	0	9910	33.68	968.917	2	1936.83	1011.32	1011	11021010	HexNAcHexNeuAcNeuAcAcNa
AVAVTLQSH	180417_07	1	1	1	0	0	15321	39.97	646.281	3	1936.83	1011.32	1011	11021010	HexNAcHexNeuAcNeuAcAcNa
AVAVTLQSH	180417_23	1	1	1	0	0	12676	37.32	968.917	2	1936.83	1011.32	1011	11021010	HexNAcHexNeuAcNeuAcAcNa
AVAVTLQSH	180417_29	1	1	1	0	0	13398	40.15	968.917	2	1936.83	1011.32	1011	11021010	HexNAcHexNeuAcNeuAcAcNa
AVAVTLQSH	180417_29	1	1	1	0	0	13154	39.58	968.917	2	1936.83	1011.32	1011	11021010	HexNAcHexNeuAcNeuAcAcNa
AVAVTLQSH	180420_22	1	1	1	0	0	11648	38.33	968.917	2	1936.83	1011.32	1011	11021010	HexNAcHexNeuAcNeuAcAcNa
AVAVTLQSH	180417_31	1	1	1	0	0	13562	36.15	968.917	2	1936.83	1011.32	1011	11021010	HexNAcHexNeuAcNeuAcAcNa
AVAVTLQSH	180417_29	1	1	1	0	0	10894	34.48	968.917	2	1936.83	1011.32	1011	11021010	HexNAcHexNeuAcNeuAcAcNa
AVAVTLQSH	180420_05	1	1	1	0	0	9253	32.6	968.918	2	1936.83	1011.32	1011	11021010	HexNAcHexNeuAcNeuAcAcNa
AVAVTLQSH	180417_31	1	1	1	0	0	13591	36.22	968.918	2	1936.83	1011.32	1011	11021010	HexNAcHexNeuAcNeuAcAcNa
AVAVTLQSH	180417_08	1	1	1	0	0	12835	41	968.918	2	1936.83	1011.32	1011	11021010	HexNAcHexNeuAcNeuAcAcNa
AVAVTLQSH	180420_22	1	1	1	0	0	9506	32.77	968.918	2	1936.83	1011.32	1011	11021010	HexNAcHexNeuAcNeuAcAcNa
AVAVTLQSH	180417_16	1	1	1	0	0	11243	35.23	968.918	2	1936.83	1011.32	1011	11021010	HexNAcHexNeuAcNeuAcAcNa
AVAVTLQSH	180420_05	1	1	1	0	0	11545	38.48	968.918	2	1936.83	1011.32	1011	11021010	HexNAcHexNeuAcNeuAcAcNa
AVAVTLQSH	180417_07	1	1	1	0	0	15614	40.52	646.281	3	1936.83	1011.32	1011	11021010	HexNAcHexNeuAcNeuAcAcNa
AVAVTLQSH	180417_16	1	1	1	0	0	13529	40.42	968.918	2	1936.83	1011.32	1011	11021010	HexNAcHexNeuAcNeuAcAcNa
AVAVTLQSH	180417_31	1	1	1	0	0	13579	36.18	968.918	2	1936.83	1011.32	1011	11021010	HexNAcHexNeuAcNeuAcAcNa
AVAVTLQSH	180420_22	1	1	1	0	0	12142	39.58	978.931	2	1956.86	1031.35	1031	11022000	HexNAcHexNeuAcAc2
AVAVTLQSH	180417_08	1	1	1	0	0	10741	35.83	978.932	2	1956.86	1031.35	1031	11022000	HexNAcHexNeuAcAc2
AVAVTLQSH	180417_16	1	1	1	0	0	14340	42.25	978.932	2	1956.86	1031.35	1031	11022000	HexNAcHexNeuAcAc2
AVAVTLQSH	180417_16	1	1	1	0	0	11945	36.85	978.933	2	1956.86	1031.35	1031	11022000	HexNAcHexNeuAcAc2
AVAVTLQSH	180417_29	1	1	1	0	0	13883	41.23	978.933	2	1956.86	1031.35	1031	11022000	HexNAcHexNeuAcAc2
AVAVTLQSH	180417_08	1	1	1	0	0	13076	41.6	978.933	2	1956.86	1031.35	1031	11022000	HexNAcHexNeuAcAc2
AVAVTLQSH	180420_05	1	1	1	0	0	9861	34.22	978.933	2	1956.86	1031.35	1031	11022000	HexNAcHexNeuAcAc2
AVAVTLQSH	180420_05	1	1	1	0	0	12021	39.65	978.933	2	1956.86	1031.35	1031	11022000	HexNAcHexNeuAcAc2
AVAVTLQSH	180417_06	1	1	1	0	0	8793	31.08	994.453	2	1987.9	1062.39	1062	31010000	HexNAc3HexNeuAc
AVAVTLQSH	180417_16	1	1	1	0	0	9245	30.48	1046.97	2	2092.93	1167.42	1167	22110000	HexNAc2Hex2FucNeuAc
AVAVTLQSH	180417_08	1	1	1	0	0	8335	29.58	1046.97	2	2092.94	1167.42	1167	22110000	HexNAc2Hex2FucNeuAc
AVAVTLQSH	180420_24	1	1	1	0	0	8389	28.52	1046.97	2	2092.94	1167.43	1167	22110000	HexNAc2Hex2FucNeuAc
AVAVTLQSH	180420_05	1	1	1	0	0	7709	28.42	1046.97	2	2092.94	1167.43	1167	22110000	HexNAc2Hex2FucNeuAc
AVAVTLQSH	180417_13	1	1	1	0	0	11762	31.88	717.321	3	2149.95	1224.44	1224	32010000	HexNAc3Hex2NeuAc
AVAVTLQSH	180417_14	1	1	1	0	0	9413	32.15	1075.48	2	2149.96	1224.45	1224	32010000	HexNAc3Hex2NeuAc
AVAVTLQSH	180420_03	1	1	1	0	0	8378	29.65	1075.48	2	2149.96	1224.45	1224	32010000	HexNAc3Hex2NeuAc
AVAVTLQSH	180417_06	1	1	1	0	0	8757	30.98	1075.48	2	2149.96	1224.45	1224	32010000	HexNAc3Hex2NeuAc
AVAVTLQSH	180417_16	1	1	1	0	0	10102	32.53	1082.46	2	2163.92	1238.41	1238	11030000	HexNAcHexNeuAc3
AVAVTLQSH	180417_06	1	1	1	0	0	9477	33.03	1082.46	2	2163.92	1238.41	1238	11030000	HexNAcHexNeuAc3
AVAVTLQSH	180417_29	1	1	1	0	0	9721	31.82	1082.47	2	2163.93	1238.42	1238	11030000	HexNAcHexNeuAc3
AVAVTLQSH	180417_08	1	1	1	0	0	8749	30.73	1082.47	2	2163.93	1238.42	1238	11030000	HexNAcHexNeuAc3
AVAVTLQSH	180420_05	1	1	1	0	0	7714	28.43	1082.47	2	2163.94	1238.43	1238	11030000	HexNAcHexNeuAc3
AVAVTLQSH	180420_14	1	1	1	0	0	9125	30.72	1082.47	2	2163.94	1238.43	1238	11030000	HexNAcHexNeuAc3
AVAVTLQSH	180422_02	1	1	1	0	0	10657	34.43	1103.47	2	2205.93	1280.42	1280	11031000	HexNAcHexNeuAcNeuAcAc
AVAVTLQSH	180420_05	1	1	1	0	0	8634	30.95	1103.47	2	2205.93	1280.42	1280	11031000	HexNAcHexNeuAcNeuAcAc
AVAVTLQSH	180420_14	1	1	1	0	0	10016	32.75	1103.47	2	2205.93	1280.42	1280	11031000	HexNAcHexNeuAcNeuAcAc
AVAVTLQSH	180420_12	1	1	1	0	0	10297	34.45	1103.47	2	2205.93	1280.42	1280	11031000	HexNAcHexNeuAcNeuAcAc
AVAVTLQSH	180417_08	1	1	1	0	0	8992	31.37	1103.47	2	2205.93	1280.42	1280	11031000	HexNAcHexNeuAcNeuAcAc
AVAVTLQSH	180417_23	1	1	1	0	0	10606	32.8	1103.47	2	2205.94	1280.43	1280	11031000	HexNAcHexNeuAcNeuAcAc
AVAVTLQSH	180417_37	1	1	1	0	0	11499	35.2	1103.47	2	2205.94	1280.43	1280	11031000	HexNAcHexNeuAcNeuAcAc
AVAVTLQSH	180417_05	1	1	1	0	0	12816	34.63	735.985	3	2205.94	1280.43	1280	11031000	HexNAcHexNeuAcNeuAcAc
AVAVTLQSH	180420_03	1	1	1	0	0	9950	34.03	1103.47	2	2205.94	1280.43	1280	11031000	HexNAcHexNeuAcNeuAcAc
AVAVTLQSH	180417_08	1	1	1	0	0	9696	33.15	1103.47	2	2205.94	1280.43	1280	11031000	HexNAcHexNeuAcNeuAcAc
AVAVTLQSH	180420_05	1	1	1	0	0	8153	29.65	1103.47	2	2205.94	1280.43	1280	11031000	HexNAcHexNeuAcNeuAcAc
AVAVTLQSH	180417_07	1	1	1	0	0	11209	32.27	735.986	3	2205.94	1280.43	1280	11031000	HexNAcHexNeuAcNeuAcAc
AVAVTLQSH	180417_26	1	1	1	0	0	13402	35.18	735.986	3	2205.94	1280.43	1280	11031000	HexNAcHexNeuAcNeuAcAc
AVAVTLQSH	180420_05	1	1	1	0	0	8341	30.2	1103.48	2	2205.95	1280.44	1280	11031000	HexNAcHexNeuAcNeuAcAc
AVAVTLQSH	180417_16	1	1	1	0	0	10399	33.23	1103.48	2	2205.95	1280.44	1280	11031000	HexNAcHexNeuAcNeuAcAc
AVAVTLQSH	180422_02	1	1	1	0	0	10646	34.42	1103.48	2	2205.95	1280.44	1280	11031000	HexNAcHexNeuAcNeuAcAc
AVAVTLQSH	180420_21	1	1	1	0	0	10567	31.95	743.31	3	2227.91	1302.4	1302	11031010	HexNAcHexNeuAc2NeuAcAcNa
AVAVTLQSH	180420_05	1	1	1	0	0	8164	29.67	1114.46	2	2227.92	1302.41	1302	11031010	HexNAcHexNeuAc2NeuAcAcNa
AVAVTLQSH	180417_07	1	1	1	0	0	11270	32.38	743.312	3	2227.92	1302.41	1302	11031010	HexNAcHexNeuAc2NeuAcAcNa
AVAVTLQSH	180417_23	1	1	1	0	0	10676	32.97	1114.46	2	2227.92	1302.41	1302	11031010	HexNAcHexNeuAc2NeuAcAcNa
AVAVTLQSH	180420_04	1	1	1	0	0	8443	28.43	743.312	3	2227.92	1302.41	1302	11031010	HexNAcHexNeuAc2NeuAcAcNa
AVAVTLQSH	180417_15	1	1	1	0	0	12994	35.12	743.313	3	2227.92	1302.41	1302	11031010	HexNAcHexNeuAc2NeuAcAcNa
AVAVTLQSH	180417_16	1	1	1	0	0	11073	34.83	1114.47	2	2227.92	1302.41	1302	11031010	HexNAcHexNeuAc2NeuAcAcNa
AVAVTLQSH	180417_29	1	1	1	0	0	10600	33.82	1114.47	2	2227.92	1302.41	1302	11031010	HexNAcHexNeuAc2NeuAcAcNa
AVAVTLQSH	180420_14	1	1	1	0	0	9986	32.68	1114.47	2	2227.92	1302.41	1302	11031010	HexNAcHexNeuAc2NeuAcAcNa
AVAVTLQSH	180417_07	1	1	1	0	0	11583	32.98	743.313	3	2227.93	1302.42	1302	11031010	HexNAcHexNeuAc2NeuAcAcNa
AVAVTLQSH	180417_08	1	1	1	0	0	9557	32.8	1114.47	2	2227.93	1302.42	1302	11031010	HexNAcHexNeuAc2NeuAcAcNa
AVAVTLQSH	180420_05	1	1	1	0	0	8357	30.23	1114.47	2	2227.93	1302.42	1302	11031010	HexNAcHexNeuAc2NeuAcAcNa
AVAVTLQSH	180422_11	1	1	1	0	0	9135	30.37	1119.48	2	2237.96	1312.45	1312	22020000	HexNAc2Hex2NeuAc2
AVAVTLQSH	180420_05	1	1	1	0	0	8946	31.77	1119.48	2	2237.96	1312.45	1312	22020000	HexNAc2Hex2NeuAc2
AVAVTLQSH	180417_23	1	1	1	0	0	10498	32.55	1119.48	2	2237.96	1312.45	1312	22020000	HexNAc2Hex2NeuAc2
AVAVTLQSH	180417_14	1	1	1	0	0	9184	31.5	1119.48	2	2237.96	1312.45	1312	22020000	HexNAc2Hex2NeuAc2
AVAVTLQSH	180417_10	1	1	1	0	0	9505	29.42	1119.48	2	2237.96	1312.45	1312	22020000	HexNAc2Hex2NeuAc2
AVAVTLQSH	180420_24	1	1	1	0	0	8831	29.48	1119.48	2	2237.96	1312.45	1312	22020000	HexNAc2Hex2NeuAc2
AVAVTLQSH	180417_31	1	1	1	0	0	9733	28.42	1119.48	2	2237.96	1312.45	1312	22020000	HexNAc2Hex2NeuAc2
AVAVTLQSH	180417_16	1	1	1	0	0	10265	32.92	1119.49	2	2237.96	1312.45	1312	22020000	HexNAc2Hex2NeuAc2
AVAVTLQSH	180417_13	1	1	1	0	0	11433	31.27	746.66	3	2237.96	1312.45	1312	22020000	HexNAc2Hex2NeuAc2
AVAVTLQSH	180417_23	1	1	1	0	0	9080	29.15	1119.49	2	2237.97	1312.45	1312	22020000	HexNAc2Hex2NeuAc2
AVAVTLQSH	180420_12	1	1	1	0	0	8881	30.78	1119.49	2	2237.97	1312.45	1312	22020000	HexNAc2Hex2NeuAc2
AVAVTLQSH	180417_26	1	1	1	0	0	11809	32.22	746.66	3	2237.97	1312.46	1312	22020000	HexNAc2Hex2NeuAc2
AVAVTLQSH	180422_13	1	1	1	0	0	8878	29.35	1119.49	2	2237.97	1312.46	1312	22020000	HexNAc2Hex2NeuAc2
AVAVTLQSH	180417_07	1	1	1	0	0	10157	30.25	746.66	3	2237.97	1312.46	1312	22020000	HexNAc2Hex2NeuAc2
AVAVTLQSH	180420_21	1	1	1	0	0	9528	29.93	746.66	3	2237.97	1312.46	1312	22020000	HexNAc2Hex2NeuAc2
AVAVTLQSH	180422_01	1	1	1	0	0	10125	31.48	746.66	3	2237.97	1312.46	1312	22020000	HexNAc2Hex2NeuAc2
AVAVTLQSH	180420_04	1	1	1	0	0	8742	29.17	746.66	3	2237.97	1312.46	1312	22020000	HexNAc2Hex2NeuAc2
AVAVTLQSH	180420_21	1	1	1	0	0	9240	29.38	746.66	3	2237.97	1312.46	1312	22020000	HexNAc2Hex2NeuAc2
AVAVTLQSH	180420_05	1	1	1	0	0	9016	31.97	1119.49	2	2237.97	1312.46	1312	22020000	HexNAc2Hex2NeuAc2
AVAVTLQSH	180417_05	1	1	1	0	0	11087	31.13	746.661	3	2237.97	1312.46	1312	22020000	HexNAc2Hex2NeuAc2
AVAVTLQSH	180417_08	1	1	1	0	0	8730	30.68	1119.49	2	2237.97	1312.46	1312	22020000	HexNAc2Hex2NeuAc2
AVAVTLQSH	180417_15	1	1	1	0	0	11160	31.73	746.661	3	2237.97	1312.46	1312	22020000	HexNAc2Hex2NeuAc2
AVAVTLQSH	180417_26	1	1	1	0	0	11508	31.67	746.661	3	2237.97	1312.46	1312	22020000	HexNAc2Hex2NeuAc2
AVAVTLQSH	180420_13	1	1	1	0	0	9350	29.35	746.661	3	2237.97	1312.46	1312	22020000	HexNAc2Hex2NeuAc2
AVAVTLQSH	180417_37	1	1	1	0	0	10014	31.72	1119.49	2	2237.97	1312.46	1312	22020000	HexNAc2Hex2NeuAc2
AVAVTLQSH	180420_05	1	1	1	0	0	8057	29.38	1119.49	2	2237.97	1312.46	1312	22020000	HexNAc2Hex2NeuAc2
AVAVTLQSH	180420_19_i	1	1	1	0	0	9396	30.67	746.661	3	2237.97	1312.46	1312	22020000	HexNAc2Hex2NeuAc2
AVAVTLQSH	180422_03	1	1	1	0	0	8443	29.4	746.661	3	2237.97	1312.46	1312	22020000	HexNAc2Hex2NeuAc2
AVAVTLQSH	180417_08	1	1	1	0	0	8773	30.8	1119.49	2	2237.97	1312.46	1312	22020000	HexNAc2Hex2NeuAc2
AVAVTLQSH	180417_07	1	1	1	0	0	10451	30.82	746.661	3	2237.97	1312.46	1312	22020000	HexNAc2Hex2NeuAc2
AVAVTLQSH	180417_39	1	1	1	0	0	8804	28.62	1119.49	2	2237.97	1312.46	1312	22020000	HexNAc2Hex2NeuAc2
AVAVTLQSH	180420_04	1	1	1	0	0	8301	28.12	746.661	3	2237.97	1312.46	1312	22020000	HexNAc2Hex2NeuAc2
AVAVTLQSH	180420_19_i	1	1	1	0	0	9612	31.18	746.661	3	2237.97	1312.46	1312	22020000	HexNAc2Hex2NeuAc2
AVAVTLQSH	180420_28	1	1	1	0	0	9874	30.8	746.661	3	2237.97	1312.46	1312	22020000	HexNAc2Hex2NeuAc2
AVAVTLQSH	180417_06	1	1	1	0	0	9068	31.88	1119.49	2	2237.97	1312.46	1312	22020000	HexNAc2Hex2NeuAc2
AVAVTLQSH	180417_07	1	1	1	0	0	9863	29.68	746.661	3	2237.97	1312.46	1312	22020000	HexNAc2Hex2NeuAc2
AVAVTLQSH	180417_15	1	1	1	0	0	11454	32.3	746.661	3	2237.97	1312.46	1312	22020000	HexNAc2Hex2NeuAc2
AVAVTLQSH	180420_04	1	1	1	0	0	8532	28.65	746.661	3	2237.97	1312.46	1312	22020000	HexNAc2Hex2NeuAc2
AVAVTLQSH	180420_05	1	1	1	0	0	8242	29.88	1119.49	2	2237.97	1312.46	1312	22020000	HexNAc2Hex2NeuAc2
AVAVTLQSH	180417_15	1	1	1	0	0	10793	31.05	746.661	3	2237.97	1312.46	1312	22020000	HexNAc2Hex2NeuAc2
AVAVTLQSH	180417_16	1	1	1	0	0	9791	31.82	1119.49	2	2237.97	1312.46	1312	22020000	HexNAc2Hex2NeuAc2
AVAVTLQSH	180420_20	1	1	1	0	0	8381	30.63	1119.49	2	2237.97	1312.46	1312	22020000	HexNAc2Hex2NeuAc2
AVAVTLQSH	180422_02	1	1	1	0	0	9356	31.23	1119.49	2	2237.97	1312.46	1312	22020000	HexNAc2Hex2NeuAc2
AVAVTLQSH	180420_03	1	1	1	0	0	8723	30.67	1119.49	2	2237.97	1312.46	1312	22020000	HexNAc2Hex2NeuAc2
AVAVTLQSH	180420_22	1	1	1	0	0	8106	29.1	1119.49	2	2237.97	1312.46	1312	22020000	HexNAc2Hex2NeuAc2
AVAVTLQSH	180420_29	1	1	1	0	0	8978	30.85	1119.49	2	2237.97	1312.46	1312	22020000	HexNAc2Hex2NeuAc2
AVAVTLQSH	180417_08	1	1	1	0	0	8943	31.25	1119.49	2	2237.97	1312.46	1312	22020000	HexNAc2Hex2NeuAc2
AVAVTLQSH	180420_14	1	1	1	0	0	8726	29.77	1119.49	2	2237.97	1312.46	1312	22020000	HexNAc2Hex2NeuAc2
AVAVTLQSH	180417_28	1	1	1	0	0	9764	28.13	746.662	3	2237.97	1312.46	1312	22020000	HexNAc2Hex2NeuAc2
AVAVTLQSH	180422_04	1	1	1	0	0	8409	29.7	1119.49	2	2237.97	1312.46	1312	22020000	HexNAc2Hex2NeuAc2
AVAVTLQSH	180417_06	1	1	1	0	0	8899	31.38	1119.49	2	2237.97	1312.46	1312	22020000	HexNAc2Hex2NeuAc2
AVAVTLQSH	180417_16	1	1	1	0	0	9557	31.23	1119.49	2	2237.97	1312.46	1312	22020000	HexNAc2Hex2NeuAc2
AVAVTLQSH	180420_05	1	1	1	0	0	7865	28.87	1119.49	2	2237.97	1312.46	1312	22020000	HexNAc2Hex2NeuAc2
AVAVTLQSH	180420_22	1	1	1	0	0	8302	29.63	1119.49	2	2237.97	1312.46	1312	22020000	HexNAc2Hex2NeuAc2
AVAVTLQSH	180420_31	1	1	1	0	0	8689	29.3	1119.49	2	2237.97	1312.46	1312	22020000	HexNAc2Hex2NeuAc2
AVAVTLQSH	180422_04	1	1	1	0	0	8618	30.22	1119.49	2	2237.97	1312.46	1312	22020000	HexNAc2Hex2NeuAc2
AVAVTLQSH	180417_07	1	1	1	0	0	10887	31.65	746.662	3	2237.97	1312.46	1312	22020000	HexNAc2Hex2NeuAc2
AVAVTLQSH	180420_22	1	1	1	0	0	8577	30.38	1119.49	2	2237.97	1312.46	1312	22020000	HexNAc2Hex2NeuAc2
AVAVTLQSH	180422_11	1	1	1	0	0	9390	30.97	1119.49	2	2237.97	1312.46	1312	22020000	HexNAc2Hex2NeuAc2
AVAVTLQSH	180417_39	1	1	1	0	0	9074	29.17	1119.49	2	2237.97	1312.46	1312	22020000	HexNAc2Hex2NeuAc2
AVAVTLQSH	180420_11	1	1	1	0	0	10063	30.53	746.662	3	2237.97	1312.46	1312	22020000	HexNAc2Hex2NeuAc2
AVAVTLQSH	180417_29	1	1	1	0	0	9199	30.6	1119.49	2	2237.97	1312.46	1312	22020000	HexNAc2Hex2NeuAc2
AVAVTLQSH	180422_04	1	1	1	0	0	8871	30.77	1119.49	2	2237.97	1312.46	1312	22020000	HexNAc2Hex2NeuAc2
AVAVTLQSH	180420_02	1	1	1	0	0	9904	30.43	746.662	3	2237.97	1312.46	1312	22020000	HexNAc2Hex2NeuAc2
AVAVTLQSH	180420_14	1	1	1	0	0	8492	29.23	1119.49	2	2237.97	1312.46	1312	22020000	HexNAc2Hex2NeuAc2
AVAVTLQSH	180417_16	1	1	1	0	0	9772	31.77	1119.49	2	2237.97	1312.46	1312	22020000	HexNAc2Hex2NeuAc2
AVAVTLQSH	180420_05	1	1	1	0	0	8424	30.4	1119.49	2	2237.97	1312.46	1312	22020000	HexNAc2Hex2NeuAc2
AVAVTLQSH	180417_08	1	1	1	0	0	9473	32.58	1119.49	2	2237.97	1312.46	1312	22020000	HexNAc2Hex2NeuAc2
AVAVTLQSH	180417_29	1	1	1	0	0	9429	31.13	1119.49	2	2237.97	1312.46	1312	22020000	HexNAc2Hex2NeuAc2
AVAVTLQSH	180420_03	1	1	1	0	0	8911	31.17	1119.49	2	2237.97	1312.46	1312	22020000	HexNAc2Hex2NeuAc2
AVAVTLQSH	180417_14	1	1	1	0	0	9367	32.02	1119.49	2	2237.97	1312.46	1312	22020000	HexNAc2Hex2NeuAc2
AVAVTLQSH	180417_27	1	1	1	0	0	9557	32.72	1119.49	2	2237.97	1312.46	1312	22020000	HexNAc2Hex2NeuAc2
AVAVTLQSH	180417_08	1	1	1	0	0	9196	31.9	1119.49	2	2237.98	1312.47	1312	22020000	HexNAc2Hex2NeuAc2
AVAVTLQSH	180420_05	1	1	1	0	0	9217	32.5	1119.49	2	2237.98	1312.47	1312	22020000	HexNAc2Hex2NeuAc2
AVAVTLQSH	180417_08	1	1	1	0	0	8539	30.18	1119.49	2	2237.98	1312.47	1312	22020000	HexNAc2Hex2NeuAc2
AVAVTLQSH	180417_06	1	1	1	0	0	11122	37.63	1124.47	2	2247.94	1322.43	1322	11032000	HexNAcHexNeuAcNeuAcAc2
AVAVTLQSH	180417_14	1	1	1	0	0	11472	37.63	1124.48	2	2247.94	1322.43	1322	11032000	HexNAcHexNeuAcNeuAcAc2
AVAVTLQSH	180417_16	1	1	1	0	0	14091	41.7	1124.48	2	2247.95	1322.44	1322	11032000	HexNAcHexNeuAcNeuAcAc2
AVAVTLQSH	180417_26	1	1	1	0	0	17218	42.8	749.987	3	2247.95	1322.44	1322	11032000	HexNAcHexNeuAcNeuAcAc2
AVAVTLQSH	180420_03	1	1	1	0	0	12341	40.98	1124.48	2	2247.95	1322.44	1322	11032000	HexNAcHexNeuAcNeuAcAc2
AVAVTLQSH	180417_16	1	1	1	0	0	14426	42.45	1124.48	2	2247.95	1322.44	1322	11032000	HexNAcHexNeuAcNeuAcAc2
AVAVTLQSH	180420_02	1	1	1	0	0	14621	41.18	749.988	3	2247.95	1322.44	1322	11032000	HexNAcHexNeuAcNeuAcAc2
AVAVTLQSH	180420_20	1	1	1	0	0	10106	35.65	1124.48	2	2247.95	1322.44	1322	11032000	HexNAcHexNeuAcNeuAcAc2
AVAVTLQSH	180417_14	1	1	1	0	0	13394	42.5	1124.48	2	2247.95	1322.44	1322	11032000	HexNAcHexNeuAcNeuAcAc2
AVAVTLQSH	180420_11	1	1	1	0	0	14800	40.92	749.988	3	2247.95	1322.44	1322	11032000	HexNAcHexNeuAcNeuAcAc2
AVAVTLQSH	180420_12	1	1	1	0	0	12788	41.1	1124.48	2	2247.95	1322.44	1322	11032000	HexNAcHexNeuAcNeuAcAc2
AVAVTLQSH	180417_05	1	1	1	0	0	13881	36.7	749.988	3	2247.95	1322.44	1322	11032000	HexNAcHexNeuAcNeuAcAc2
AVAVTLQSH	180420_05	1	1	1	0	0	11860	39.25	1124.48	2	2247.95	1322.44	1322	11032000	HexNAcHexNeuAcNeuAcAc2
AVAVTLQSH	180417_07	1	1	1	0	0	16279	41.75	749.988	3	2247.95	1322.44	1322	11032000	HexNAcHexNeuAcNeuAcAc2
AVAVTLQSH	180417_15	1	1	1	0	0	16970	42.58	749.988	3	2247.95	1322.44	1322	11032000	HexNAcHexNeuAcNeuAcAc2
AVAVTLQSH	180420_19_i	1	1	1	0	0	13851	40.83	749.988	3	2247.95	1322.44	1322	11032000	HexNAcHexNeuAcNeuAcAc2
AVAVTLQSH	180420_03	1	1	1	0	0	12526	41.52	1124.48	2	2247.95	1322.44	1322	11032000	HexNAcHexNeuAcNeuAcAc2
AVAVTLQSH	180417_05	1	1	1	0	0	16608	42.17	749.989	3	2247.95	1322.44	1322	11032000	HexNAcHexNeuAcNeuAcAc2
AVAVTLQSH	180417_05	1	1	1	0	0	16875	42.7	749.989	3	2247.95	1322.44	1322	11032000	HexNAcHexNeuAcNeuAcAc2
AVAVTLQSH	180420_29	1	1	1	0	0	12832	40.83	1124.48	2	2247.95	1322.44	1322	11032000	HexNAcHexNeuAcNeuAcAc2
AVAVTLQSH	180420_19_i	1	1	1	0	0	14084	41.33	749.989	3	2247.95	1322.44	1322	11032000	HexNAcHexNeuAcNeuAcAc2
AVAVTLQSH	180417_06	1	1	1	0	0	13043	42.92	1124.48	2	2247.95	1322.44	1322	11032000	HexNAcHexNeuAcNeuAcAc2
AVAVTLQSH	180417_14	1	1	1	0	0	13383	42.47	1124.48	2	2247.95	1322.44	1322	11032000	HexNAcHexNeuAcNeuAcAc2
AVAVTLQSH	180420_20	1	1	1	0	0	11839	40.53	1124.48	2	2247.95	1322.44	1322	11032000	HexNAcHexNeuAcNeuAcAc2
AVAVTLQSH	180420_02	1	1	1	0	0	14856	41.72	749.989	3	2247.95	1322.44	1322	11032000	HexNAcHexNeuAcNeuAcAc2
AVAVTLQSH	180417_29	1	1	1	0	0	13570	40.52	1124.48	2	2247.95	1322.44	1322	11032000	HexNAcHexNeuAcNeuAcAc2
AVAVTLQSH	180422_02	1	1	1	0	0	13308	41.18	1124.48	2	2247.95	1322.44	1322	11032000	HexNAcHexNeuAcNeuAcAc2
AVAVTLQSH	180420_03	1	1	1	0	0	10585	35.87	1124.48	2	2247.95	1322.44	1322	11032000	HexNAcHexNeuAcNeuAcAc2
AVAVTLQSH	180417_06	1	1	1	0	0	12859	42.4	1124.48	2	2247.95	1322.44	1322	11032000	HexNAcHexNeuAcNeuAcAc2
AVAVTLQSH	180420_12	1	1	1	0	0	12995	41.6	1124.48	2	2247.95	1322.44	1322	11032000	HexNAcHexNeuAcNeuAcAc2
AVAVTLQSH	180417_27	1	1	1	0	0	13709	43.58	1124.48	2	2247.96	1322.44	1322	11032000	HexNAcHexNeuAcNeuAcAc2
AVAVTLQSH	180417_13	1	1	1	0	0	17033	42.43	749.99	3	2247.96	1322.45	1322	11032000	HexNAcHexNeuAcNeuAcAc2
AVAVTLQSH	180420_20	1	1	1	0	0	12020	41.03	1124.48	2	2247.96	1322.45	1322	11032000	HexNAcHexNeuAcNeuAcAc2
AVAVTLQSH	180422_01	1	1	1	0	0	14596	41.55	749.99	3	2247.96	1322.45	1322	11032000	HexNAcHexNeuAcNeuAcAc2
AVAVTLQSH	180417_16	1	1	1	0	0	14056	41.62	1124.48	2	2247.96	1322.45	1322	11032000	HexNAcHexNeuAcNeuAcAc2
AVAVTLQSH	180420_05	1	1	1	0	0	9454	33.17	1124.48	2	2247.96	1322.45	1322	11032000	HexNAcHexNeuAcNeuAcAc2
AVAVTLQSH	180420_14	1	1	1	0	0	13527	40.62	1124.48	2	2247.96	1322.45	1322	11032000	HexNAcHexNeuAcNeuAcAc2
AVAVTLQSH	180422_04	1	1	1	0	0	13435	40.82	1124.48	2	2247.96	1322.45	1322	11032000	HexNAcHexNeuAcNeuAcAc2
AVAVTLQSH	180417_29	1	1	1	0	0	14027	41.57	1124.48	2	2247.96	1322.45	1322	11032000	HexNAcHexNeuAcNeuAcAc2
AVAVTLQSH	180417_08	1	1	1	0	0	13159	41.8	1124.48	2	2247.96	1322.45	1322	11032000	HexNAcHexNeuAcNeuAcAc2
AVAVTLQSH	180420_22	1	1	1	0	0	12435	40.28	1124.48	2	2247.96	1322.45	1322	11032000	HexNAcHexNeuAcNeuAcAc2
AVAVTLQSH	180417_08	1	1	1	0	0	13387	42.33	1124.48	2	2247.96	1322.45	1322	11032000	HexNAcHexNeuAcNeuAcAc2
AVAVTLQSH	180417_06	1	1	1	0	0	10885	37	1124.48	2	2247.96	1322.45	1322	11032000	HexNAcHexNeuAcNeuAcAc2
AVAVTLQSH	180417_37	1	1	1	0	0	14484	42.2	1124.48	2	2247.96	1322.45	1322	11032000	HexNAcHexNeuAcNeuAcAc2
AVAVTLQSH	180417_16	1	1	1	0	0	11999	36.97	1124.48	2	2247.96	1322.45	1322	11032000	HexNAcHexNeuAcNeuAcAc2
AVAVTLQSH	180417_07	1	1	1	0	0	10984	31.83	753.986	3	2259.94	1334.43	1334	22020010	HexNAc2Hex2NeuAc2Na
AVAVTLQSH	180417_28	1	1	1	0	0	9697	28.02	753.987	3	2259.95	1334.44	1334	22020010	HexNAc2Hex2NeuAc2Na
AVAVTLQSH	180420_13	1	1	1	0	0	9282	29.22	753.987	3	2259.95	1334.44	1334	22020010	HexNAc2Hex2NeuAc2Na
AVAVTLQSH	180420_04	1	1	1	0	0	8449	28.45	753.987	3	2259.95	1334.44	1334	22020010	HexNAc2Hex2NeuAc2Na
AVAVTLQSH	180417_15	1	1	1	0	0	11141	31.7	753.988	3	2259.95	1334.44	1334	22020010	HexNAc2Hex2NeuAc2Na
AVAVTLQSH	180417_15	1	1	1	0	2	11437	32.27	753.988	3	2259.95	1334.44	1334	22020010	HexNAc2Hex2NeuAc2Na
AVAVTLQSH	180420_04	1	1	1	0	0	8668	28.98	753.988	3	2259.95	1334.44	1334	22020010	HexNAc2Hex2NeuAc2Na
AVAVTLQSH	180417_08	1	1	1	0	2	8743	30.72	1130.48	2	2259.95	1334.44	1334	22020010	HexNAc2Hex2NeuAc2Na
AVAVTLQSH	180417_07	1	1	1	0	2	10407	30.73	753.988	3	2259.95	1334.44	1334	22020010	HexNAc2Hex2NeuAc2Na
AVAVTLQSH	180417_29	1	1	1	0	2	9387	31.05	1130.48	2	2259.95	1334.44	1334	22020010	HexNAc2Hex2NeuAc2Na
AVAVTLQSH	180420_21	1	1	1	0	0	9201	29.32	753.988	3	2259.95	1334.44	1334	22020010	HexNAc2Hex2NeuAc2Na
AVAVTLQSH	180417_28	1	1	1	0	2	9997	28.55	753.988	3	2259.95	1334.44	1334	22020010	HexNAc2Hex2NeuAc2Na
AVAVTLQSH	180420_21	1	1	1	0	0	9481	29.85	753.988	3	2259.95	1334.44	1334	22020010	HexNAc2Hex2NeuAc2Na
AVAVTLQSH	180417_07	1	1	1	0	2	10131	30.22	753.989	3	2259.95	1334.44	1334	22020010	HexNAc2Hex2NeuAc2Na
AVAVTLQSH	180417_07	1	1	1	0	0	16162	41.53	757.315	3	2269.93	1344.42	1344	11032010	HexNAcHexNeuAcNeuAcAc2Na
AVAVTLQSH	180417_15	1	1	1	0	0	17069	42.77	757.315	3	2269.93	1344.42	1344	11032010	HexNAcHexNeuAcNeuAcAc2Na
AVAVTLQSH	180417_15	1	1	1	0	0	14315	37.57	757.316	3	2269.93	1344.42	1344	11032010	HexNAcHexNeuAcNeuAcAc2Na
AVAVTLQSH	180417_28	1	1	1	0	0	16154	39.7	757.316	3	2269.93	1344.42	1344	11032010	HexNAcHexNeuAcNeuAcAc2Na
AVAVTLQSH	180417_08	1	1	1	0	0	13335	42.22	1135.47	2	2269.93	1344.42	1344	11032010	HexNAcHexNeuAcNeuAcAc2Na
AVAVTLQSH	180420_14	1	1	1	0	0	13399	40.33	1135.47	2	2269.93	1344.42	1344	11032010	HexNAcHexNeuAcNeuAcAc2Na
AVAVTLQSH	180417_16	1	1	1	0	0	14428	42.45	1135.47	2	2269.93	1344.42	1344	11032010	HexNAcHexNeuAcNeuAcAc2Na
AVAVTLQSH	180417_16	1	1	1	0	0	14684	43.03	1135.47	2	2269.94	1344.43	1344	11032010	HexNAcHexNeuAcNeuAcAc2Na
AVAVTLQSH	180417_29	1	1	1	0	0	14072	41.67	1135.47	2	2269.94	1344.43	1344	11032010	HexNAcHexNeuAcNeuAcAc2Na
AVAVTLQSH	180417_08	1	1	1	0	0	10781	35.93	1135.47	2	2269.94	1344.43	1344	11032010	HexNAcHexNeuAcNeuAcAc2Na
AVAVTLQSH	180417_16	1	1	1	0	0	12087	37.15	1135.47	2	2269.94	1344.43	1344	11032010	HexNAcHexNeuAcNeuAcAc2Na
AVAVTLQSH	180422_04	1	1	1	0	0	13725	41.42	1135.47	2	2269.94	1344.43	1344	11032010	HexNAcHexNeuAcNeuAcAc2Na
AVAVTLQSH	180420_21	1	1	1	0	0	14698	39.75	757.319	3	2269.94	1344.43	1344	11032010	HexNAcHexNeuAcNeuAcAc2Na
AVAVTLQSH	180417_08	1	1	1	0	0	13107	41.67	1135.48	2	2269.94	1344.43	1344	11032010	HexNAcHexNeuAcNeuAcAc2Na
AVAVTLQSH	180420_03	1	1	1	0	0	9716	33.38	1140.49	2	2279.97	1354.46	1354	22021000	HexNAc2Hex2NeuAcNeuAcAc
AVAVTLQSH	180417_37	1	1	1	0	0	10746	33.48	1140.49	2	2279.97	1354.46	1354	22021000	HexNAc2Hex2NeuAcNeuAcAc
AVAVTLQSH	180417_06	1	1	1	0	0	11838	39.57	1140.49	2	2279.97	1354.46	1354	22021000	HexNAc2Hex2NeuAcNeuAcAc
AVAVTLQSH	180420_02	1	1	1	0	0	13304	38.17	760.662	3	2279.97	1354.46	1354	22021000	HexNAc2Hex2NeuAcNeuAcAc
AVAVTLQSH	180420_19_i	1	1	1	0	0	10480	33.13	760.662	3	2279.97	1354.46	1354	22021000	HexNAc2Hex2NeuAcNeuAcAc
AVAVTLQSH	180417_13	1	1	1	0	0	12508	33.32	760.662	3	2279.97	1354.46	1354	22021000	HexNAc2Hex2NeuAcNeuAcAc
AVAVTLQSH	180420_20	1	1	1	0	0	10973	38.07	1140.49	2	2279.97	1354.46	1354	22021000	HexNAc2Hex2NeuAcNeuAcAc
AVAVTLQSH	180420_03	1	1	1	0	0	11384	38.2	1140.49	2	2279.97	1354.46	1354	22021000	HexNAc2Hex2NeuAcNeuAcAc
AVAVTLQSH	180417_16	1	1	1	0	0	9882	32.03	1140.49	2	2279.97	1354.46	1354	22021000	HexNAc2Hex2NeuAcNeuAcAc
AVAVTLQSH	180417_06	1	1	1	0	0	9060	31.87	1140.49	2	2279.97	1354.46	1354	22021000	HexNAc2Hex2NeuAcNeuAcAc
AVAVTLQSH	180417_08	1	1	1	0	0	9795	33.38	1140.49	2	2279.97	1354.46	1354	22021000	HexNAc2Hex2NeuAcNeuAcAc
AVAVTLQSH	180417_28	1	1	1	0	0	10954	30.32	760.663	3	2279.97	1354.46	1354	22021000	HexNAc2Hex2NeuAcNeuAcAc
AVAVTLQSH	180417_27	1	1	1	0	0	10141	34.38	1140.49	2	2279.97	1354.46	1354	22021000	HexNAc2Hex2NeuAcNeuAcAc
AVAVTLQSH	180417_37	1	1	1	0	0	13272	39.43	1140.49	2	2279.97	1354.46	1354	22021000	HexNAc2Hex2NeuAcNeuAcAc
AVAVTLQSH	180417_14	1	1	1	0	0	9983	33.67	1140.49	2	2279.98	1354.46	1354	22021000	HexNAc2Hex2NeuAcNeuAcAc
AVAVTLQSH	180420_03	1	1	1	0	0	8902	31.13	1140.49	2	2279.98	1354.47	1354	22021000	HexNAc2Hex2NeuAcNeuAcAc
AVAVTLQSH	180420_03	1	1	1	0	0	11575	38.75	1140.49	2	2279.98	1354.47	1354	22021000	HexNAc2Hex2NeuAcNeuAcAc
AVAVTLQSH	180417_38	1	1	1	0	0	10183	29.93	760.664	3	2279.98	1354.47	1354	22021000	HexNAc2Hex2NeuAcNeuAcAc
AVAVTLQSH	180417_05	1	1	1	0	0	11933	32.95	760.664	3	2279.98	1354.47	1354	22021000	HexNAc2Hex2NeuAcNeuAcAc
AVAVTLQSH	180420_04	1	1	1	0	0	9362	30.68	760.664	3	2279.98	1354.47	1354	22021000	HexNAc2Hex2NeuAcNeuAcAc
AVAVTLQSH	180420_04	1	1	1	0	0	12359	37.18	760.664	3	2279.98	1354.47	1354	22021000	HexNAc2Hex2NeuAcNeuAcAc
AVAVTLQSH	180422_02	1	1	1	0	0	9966	32.73	1140.49	2	2279.98	1354.47	1354	22021000	HexNAc2Hex2NeuAcNeuAcAc
AVAVTLQSH	180417_26	1	1	1	0	2	12619	33.72	760.664	3	2279.98	1354.47	1354	22021000	HexNAc2Hex2NeuAcNeuAcAc
AVAVTLQSH	180417_08	1	1	1	0	0	9587	32.87	1140.49	2	2279.98	1354.47	1354	22021000	HexNAc2Hex2NeuAcNeuAcAc
AVAVTLQSH	180420_14	1	1	1	0	0	11976	37.2	1140.49	2	2279.98	1354.47	1354	22021000	HexNAc2Hex2NeuAcNeuAcAc
AVAVTLQSH	180420_02	1	1	1	0	0	10683	32.17	760.664	3	2279.98	1354.47	1354	22021000	HexNAc2Hex2NeuAcNeuAcAc
AVAVTLQSH	180417_07	1	1	1	0	0	14914	39.2	760.664	3	2279.98	1354.47	1354	22021000	HexNAc2Hex2NeuAcNeuAcAc
AVAVTLQSH	180420_19_i	1	1	1	0	0	10180	32.45	760.664	3	2279.98	1354.47	1354	22021000	HexNAc2Hex2NeuAcNeuAcAc
AVAVTLQSH	180417_26	1	1	1	0	0	15808	39.93	760.664	3	2279.98	1354.47	1354	22021000	HexNAc2Hex2NeuAcNeuAcAc
AVAVTLQSH	180420_05	1	1	1	0	0	11107	37.4	1140.49	2	2279.98	1354.47	1354	22021000	HexNAc2Hex2NeuAcNeuAcAc
AVAVTLQSH	180417_07	1	1	1	0	0	11368	32.58	760.664	3	2279.98	1354.47	1354	22021000	HexNAc2Hex2NeuAcNeuAcAc
AVAVTLQSH	180417_29	1	1	1	0	0	10063	32.58	1140.49	2	2279.98	1354.47	1354	22021000	HexNAc2Hex2NeuAcNeuAcAc
AVAVTLQSH	180420_11	1	1	1	0	0	13463	38.03	760.665	3	2279.98	1354.47	1354	22021000	HexNAc2Hex2NeuAcNeuAcAc
AVAVTLQSH	180417_15	1	1	1	0	0	12356	33.95	760.665	3	2279.98	1354.47	1354	22021000	HexNAc2Hex2NeuAcNeuAcAc
AVAVTLQSH	180420_14	1	1	1	0	0	9559	31.68	1140.49	2	2279.98	1354.47	1354	22021000	HexNAc2Hex2NeuAcNeuAcAc
AVAVTLQSH	180420_21	1	1	1	0	0	10190	31.25	760.665	3	2279.98	1354.47	1354	22021000	HexNAc2Hex2NeuAcNeuAcAc
AVAVTLQSH	180420_02	1	1	1	0	0	13523	38.7	760.665	3	2279.98	1354.47	1354	22021000	HexNAc2Hex2NeuAcNeuAcAc
AVAVTLQSH	180417_06	1	1	1	0	0	9589	33.35	1140.49	2	2279.98	1354.47	1354	22021000	HexNAc2Hex2NeuAcNeuAcAc
AVAVTLQSH	180417_27	1	1	1	0	0	10429	35.15	1140.49	2	2279.98	1354.47	1354	22021000	HexNAc2Hex2NeuAcNeuAcAc
AVAVTLQSH	180420_22	1	1	1	0	0	11161	37.07	1140.49	2	2279.98	1354.47	1354	22021000	HexNAc2Hex2NeuAcNeuAcAc
AVAVTLQSH	180422_02	1	1	1	0	0	12242	38.57	1140.49	2	2279.98	1354.47	1354	22021000	HexNAc2Hex2NeuAcNeuAcAc
AVAVTLQSH	180420_20	1	1	1	0	0	8925	32.3	1140.49	2	2279.98	1354.47	1354	22021000	HexNAc2Hex2NeuAcNeuAcAc
AVAVTLQSH	180417_05	1	1	1	0	0	11324	31.63	760.665	3	2279.98	1354.47	1354	22021000	HexNAc2Hex2NeuAcNeuAcAc
AVAVTLQSH	180417_05	1	1	1	0	0	15423	39.85	760.665	3	2279.98	1354.47	1354	22021000	HexNAc2Hex2NeuAcNeuAcAc
AVAVTLQSH	180417_05	1	1	1	0	0	15148	39.3	760.665	3	2279.98	1354.47	1354	22021000	HexNAc2Hex2NeuAcNeuAcAc
AVAVTLQSH	180417_08	1	1	1	0	0	9391	32.38	1140.49	2	2279.98	1354.47	1354	22021000	HexNAc2Hex2NeuAcNeuAcAc
AVAVTLQSH	180420_12	1	1	1	0	0	9579	32.62	1140.49	2	2279.98	1354.47	1354	22021000	HexNAc2Hex2NeuAcNeuAcAc
AVAVTLQSH	180420_11	1	1	1	0	0	10814	32.17	760.666	3	2279.98	1354.47	1354	22021000	HexNAc2Hex2NeuAcNeuAcAc
AVAVTLQSH	180417_06	1	1	1	0	0	9784	33.9	1140.5	2	2279.98	1354.47	1354	22021000	HexNAc2Hex2NeuAcNeuAcAc
AVAVTLQSH	180417_16	1	1	1	0	0	10473	33.4	1140.5	2	2279.98	1354.47	1354	22021000	HexNAc2Hex2NeuAcNeuAcAc
AVAVTLQSH	180417_29	1	1	1	0	0	10301	33.13	1140.5	2	2279.98	1354.47	1354	22021000	HexNAc2Hex2NeuAcNeuAcAc
AVAVTLQSH	180420_03	1	1	1	0	0	9500	32.8	1140.5	2	2279.98	1354.47	1354	22021000	HexNAc2Hex2NeuAcNeuAcAc
AVAVTLQSH	180417_06	1	1	1	0	0	9244	32.4	1140.5	2	2279.99	1354.47	1354	22021000	HexNAc2Hex2NeuAcNeuAcAc
AVAVTLQSH	180420_19_i	1	1	1	0	0	12721	38.28	760.667	3	2279.99	1354.48	1354	22021000	HexNAc2Hex2NeuAcNeuAcAc
AVAVTLQSH	180420_12	1	1	1	0	0	9794	33.18	1140.5	2	2279.99	1354.48	1354	22021000	HexNAc2Hex2NeuAcNeuAcAc
AVAVTLQSH	180417_39	1	1	1	0	0	9781	30.63	1140.5	2	2279.99	1354.48	1354	22021000	HexNAc2Hex2NeuAcNeuAcAc
AVAVTLQSH	180420_14	1	1	1	0	0	9310	31.13	1140.5	2	2279.99	1354.48	1354	22021000	HexNAc2Hex2NeuAcNeuAcAc
AVAVTLQSH	180420_22	1	1	1	0	0	8955	31.35	1140.5	2	2279.99	1354.48	1354	22021000	HexNAc2Hex2NeuAcNeuAcAc
AVAVTLQSH	180417_06	1	1	1	0	0	12024	40.08	1140.5	2	2279.99	1354.48	1354	22021000	HexNAc2Hex2NeuAcNeuAcAc
AVAVTLQSH	180417_07	1	1	1	0	0	16518	42.17	763.991	3	2289.96	1364.45	1364	11033000	HexNAcHexNeuAcNeuAcAcNeuAcAcAc
AVAVTLQSH	180417_08	1	1	1	0	0	13456	42.48	1145.48	2	2289.96	1364.45	1364	11033000	HexNAcHexNeuAcNeuAcAcNeuAcAcAc
AVAVTLQSH	180417_16	1	1	1	0	0	14840	43.38	1145.49	2	2289.96	1364.45	1364	11033000	HexNAcHexNeuAcNeuAcAcNeuAcAcAc
AVAVTLQSH	180420_03	1	1	1	0	0	7490	27.12	1148.5	2	2296	1370.49	1370	32110000	HexNAc3Hex2FucNeuAc
AVAVTLQSH	180417_16	1	1	1	0	0	9518	31.15	1148.51	2	2296	1370.49	1370	32110000	HexNAc3Hex2FucNeuAc
AVAVTLQSH	180417_06	1	1	1	0	0	7852	28.25	1148.51	2	2296	1370.49	1370	32110000	HexNAc3Hex2FucNeuAc
AVAVTLQSH	180417_05	1	1	1	0	0	9395	27.68	766.008	3	2296.01	1370.5	1370	32110000	HexNAc3Hex2FucNeuAc
AVAVTLQSH	180417_15	1	1	1	0	0	11110	31.63	766.008	3	2296.01	1370.5	1370	32110000	HexNAc3Hex2FucNeuAc
AVAVTLQSH	180422_02	1	1	1	0	0	8739	29.62	1148.51	2	2296.01	1370.5	1370	32110000	HexNAc3Hex2FucNeuAc
AVAVTLQSH	180417_15	1	1	1	0	0	9849	29.28	766.008	3	2296.01	1370.5	1370	32110000	HexNAc3Hex2FucNeuAc
AVAVTLQSH	180420_05	1	1	1	0	0	8337	30.18	1148.51	2	2296.01	1370.5	1370	32110000	HexNAc3Hex2FucNeuAc
AVAVTLQSH	180422_04	1	1	1	0	0	8525	29.97	1148.51	2	2296.01	1370.5	1370	32110000	HexNAc3Hex2FucNeuAc
AVAVTLQSH	180420_05	1	1	1	0	0	7624	28.22	1148.51	2	2296.02	1370.51	1370	32110000	HexNAc3Hex2FucNeuAc
AVAVTLQSH	180420_21	1	1	1	0	0	13499	37.43	767.991	3	2301.96	1376.45	1376	22021010	HexNAc2Hex2NeuAcNeuAcAcNa
AVAVTLQSH	180417_07	1	1	1	0	2	11352	32.55	767.991	3	2301.96	1376.45	1376	22021010	HexNAc2Hex2NeuAcNeuAcAcNa
AVAVTLQSH	180417_15	1	1	1	0	0	15536	39.88	767.991	3	2301.96	1376.45	1376	22021010	HexNAc2Hex2NeuAcNeuAcAcNa
AVAVTLQSH	180417_15	1	1	1	0	0	12235	33.73	767.991	3	2301.96	1376.45	1376	22021010	HexNAc2Hex2NeuAcNeuAcAcNa
AVAVTLQSH	180417_15	1	1	1	0	0	12554	34.3	767.991	3	2301.96	1376.45	1376	22021010	HexNAc2Hex2NeuAcNeuAcAcNa
AVAVTLQSH	180420_21	1	1	1	0	0	10155	31.18	767.991	3	2301.96	1376.45	1376	22021010	HexNAc2Hex2NeuAcNeuAcAcNa
AVAVTLQSH	180417_05	1	1	1	0	2	12028	33.13	767.991	3	2301.96	1376.45	1376	22021010	HexNAc2Hex2NeuAcNeuAcAcNa
AVAVTLQSH	180420_05	1	1	1	0	0	7695	28.38	1159.46	2	2317.91	1392.4	1392	22020100	HexNAc2Hex2NeuAc2Sulph
AVAVTLQSH	180417_08	1	1	1	0	0	8670	30.53	1159.46	2	2317.92	1392.41	1392	22020100	HexNAc2Hex2NeuAc2Sulph
AVAVTLQSH	180417_14	1	1	1	0	0	9306	31.85	1159.46	2	2317.92	1392.41	1392	22020100	HexNAc2Hex2NeuAc2Sulph
AVAVTLQSH	180417_27	1	1	1	0	0	9584	32.8	1159.46	2	2317.92	1392.41	1392	22020100	HexNAc2Hex2NeuAc2Sulph
AVAVTLQSH	180420_05	1	1	1	0	0	7502	27.87	1159.46	2	2317.92	1392.41	1392	22020100	HexNAc2Hex2NeuAc2Sulph
AVAVTLQSH	180417_07	1	1	1	0	0	10018	29.97	773.315	3	2317.93	1392.42	1392	22020100	HexNAc2Hex2NeuAc2Sulph
AVAVTLQSH	180420_14	1	1	1	0	0	9090	30.63	1159.47	2	2317.94	1392.42	1392	22020100	HexNAc2Hex2NeuAc2Sulph
AVAVTLQSH	180420_04	1	1	1	0	0	7971	27.35	773.317	3	2317.94	1392.43	1392	22020100	HexNAc2Hex2NeuAc2Sulph
AVAVTLQSH	180420_29	1	1	1	0	0	11888	38.42	1161.49	2	2321.97	1396.46	1396	22022000	HexNAc2Hex2NeuAcAc2
AVAVTLQSH	180422_11	1	1	1	0	0	12317	38.02	1161.49	2	2321.97	1396.46	1396	22022000	HexNAc2Hex2NeuAcAc2
AVAVTLQSH	180420_05	1	1	1	0	0	11686	38.83	1161.49	2	2321.97	1396.46	1396	22022000	HexNAc2Hex2NeuAcAc2
AVAVTLQSH	180422_11	1	1	1	0	0	12971	39.53	1161.49	2	2321.97	1396.46	1396	22022000	HexNAc2Hex2NeuAcAc2
AVAVTLQSH	180417_14	1	1	1	0	0	10731	35.7	1161.49	2	2321.98	1396.47	1396	22022000	HexNAc2Hex2NeuAcAc2
AVAVTLQSH	180417_06	1	1	1	0	0	12280	40.78	1161.49	2	2321.98	1396.47	1396	22022000	HexNAc2Hex2NeuAcAc2
AVAVTLQSH	180422_11	1	1	1	0	0	12743	39	1161.49	2	2321.98	1396.47	1396	22022000	HexNAc2Hex2NeuAcAc2
AVAVTLQSH	180420_20	1	1	1	0	0	11256	38.87	1161.49	2	2321.98	1396.47	1396	22022000	HexNAc2Hex2NeuAcAc2
AVAVTLQSH	180417_37	1	1	1	0	0	13752	40.55	1161.49	2	2321.98	1396.47	1396	22022000	HexNAc2Hex2NeuAcAc2
AVAVTLQSH	180420_03	1	1	1	0	0	11315	37.98	1161.49	2	2321.98	1396.47	1396	22022000	HexNAc2Hex2NeuAcAc2
AVAVTLQSH	180417_13	1	1	1	0	0	13856	35.97	774.665	3	2321.98	1396.47	1396	22022000	HexNAc2Hex2NeuAcAc2
AVAVTLQSH	180420_29	1	1	1	0	0	10415	34.62	1161.49	2	2321.98	1396.47	1396	22022000	HexNAc2Hex2NeuAcAc2
AVAVTLQSH	180420_12	1	1	1	0	0	12149	39.4	1161.5	2	2321.98	1396.47	1396	22022000	HexNAc2Hex2NeuAcAc2
AVAVTLQSH	180420_19_i	1	1	1	0	0	12751	38.35	774.666	3	2321.98	1396.47	1396	22022000	HexNAc2Hex2NeuAcAc2
AVAVTLQSH	180420_02	1	1	1	0	0	13806	39.37	774.666	3	2321.98	1396.47	1396	22022000	HexNAc2Hex2NeuAcAc2
AVAVTLQSH	180420_02	1	1	1	0	0	13837	39.43	774.667	3	2321.99	1396.48	1396	22022000	HexNAc2Hex2NeuAcAc2
AVAVTLQSH	180420_20	1	1	1	0	0	11007	38.15	1161.5	2	2321.99	1396.48	1396	22022000	HexNAc2Hex2NeuAcAc2
AVAVTLQSH	180420_19_i	1	1	1	0	0	13252	39.47	774.667	3	2321.99	1396.48	1396	22022000	HexNAc2Hex2NeuAcAc2
AVAVTLQSH	180417_26	1	1	1	0	0	16635	41.65	774.667	3	2321.99	1396.48	1396	22022000	HexNAc2Hex2NeuAcAc2
AVAVTLQSH	180420_19_i	1	1	1	0	0	11058	34.43	774.667	3	2321.99	1396.48	1396	22022000	HexNAc2Hex2NeuAcAc2
AVAVTLQSH	180420_12	1	1	1	0	0	12347	39.93	1161.5	2	2321.99	1396.48	1396	22022000	HexNAc2Hex2NeuAcAc2
AVAVTLQSH	180417_26	1	1	1	0	0	13726	35.83	774.667	3	2321.99	1396.48	1396	22022000	HexNAc2Hex2NeuAcAc2
AVAVTLQSH	180417_06	1	1	1	0	0	12499	41.42	1161.5	2	2321.99	1396.48	1396	22022000	HexNAc2Hex2NeuAcAc2
AVAVTLQSH	180417_05	1	1	1	0	0	15134	39.27	774.667	3	2321.99	1396.48	1396	22022000	HexNAc2Hex2NeuAcAc2
AVAVTLQSH	180422_01	1	1	1	0	0	13860	39.87	774.667	3	2321.99	1396.48	1396	22022000	HexNAc2Hex2NeuAcAc2
AVAVTLQSH	180417_29	1	1	1	0	0	13469	40.3	1161.5	2	2321.99	1396.48	1396	22022000	HexNAc2Hex2NeuAcAc2
AVAVTLQSH	180420_02	1	1	1	0	0	14068	39.95	774.668	3	2321.99	1396.48	1396	22022000	HexNAc2Hex2NeuAcAc2
AVAVTLQSH	180417_14	1	1	1	0	0	13067	41.67	1161.5	2	2321.99	1396.48	1396	22022000	HexNAc2Hex2NeuAcAc2
AVAVTLQSH	180420_02	1	1	1	0	0	14077	39.98	774.668	3	2321.99	1396.48	1396	22022000	HexNAc2Hex2NeuAcAc2
AVAVTLQSH	180417_15	1	1	1	0	0	16294	41.32	774.668	3	2321.99	1396.48	1396	22022000	HexNAc2Hex2NeuAcAc2
AVAVTLQSH	180417_13	1	1	1	0	0	16574	41.48	774.668	3	2321.99	1396.48	1396	22022000	HexNAc2Hex2NeuAcAc2
AVAVTLQSH	180417_05	1	1	1	0	0	16053	41.08	774.668	3	2321.99	1396.48	1396	22022000	HexNAc2Hex2NeuAcAc2
AVAVTLQSH	180420_19_i	1	1	1	0	0	11297	34.98	774.668	3	2321.99	1396.48	1396	22022000	HexNAc2Hex2NeuAcAc2
AVAVTLQSH	180417_13	1	1	1	0	0	16298	40.93	774.668	3	2321.99	1396.48	1396	22022000	HexNAc2Hex2NeuAcAc2
AVAVTLQSH	180417_16	1	1	1	0	0	13744	40.92	1161.5	2	2321.99	1396.48	1396	22022000	HexNAc2Hex2NeuAcAc2
AVAVTLQSH	180417_05	1	1	1	0	0	15777	40.55	774.668	3	2321.99	1396.48	1396	22022000	HexNAc2Hex2NeuAcAc2
AVAVTLQSH	180417_26	1	1	1	0	0	14048	36.5	774.668	3	2321.99	1396.48	1396	22022000	HexNAc2Hex2NeuAcAc2
AVAVTLQSH	180417_13	1	1	1	0	0	15844	40.02	774.668	3	2321.99	1396.48	1396	22022000	HexNAc2Hex2NeuAcAc2
AVAVTLQSH	180417_05	1	1	1	0	0	15406	39.82	774.668	3	2321.99	1396.48	1396	22022000	HexNAc2Hex2NeuAcAc2
AVAVTLQSH	180420_02	1	1	1	0	0	11475	33.95	774.668	3	2321.99	1396.48	1396	22022000	HexNAc2Hex2NeuAcAc2
AVAVTLQSH	180420_20	1	1	1	0	0	11430	39.37	1161.5	2	2321.99	1396.48	1396	22022000	HexNAc2Hex2NeuAcAc2
AVAVTLQSH	180417_06	1	1	1	0	0	12025	40.08	1161.5	2	2321.99	1396.48	1396	22022000	HexNAc2Hex2NeuAcAc2
AVAVTLQSH	180420_19_i	1	1	1	0	0	13480	39.98	774.668	3	2321.99	1396.48	1396	22022000	HexNAc2Hex2NeuAcAc2
AVAVTLQSH	180420_19_i	1	1	1	0	0	13717	40.53	774.668	3	2321.99	1396.48	1396	22022000	HexNAc2Hex2NeuAcAc2
AVAVTLQSH	180417_26	1	1	1	0	0	16386	41.12	774.669	3	2321.99	1396.48	1396	22022000	HexNAc2Hex2NeuAcAc2
AVAVTLQSH	180417_05	1	1	1	0	0	13104	35.18	774.669	3	2321.99	1396.48	1396	22022000	HexNAc2Hex2NeuAcAc2
AVAVTLQSH	180417_27	1	1	1	0	0	11184	37.15	1161.5	2	2321.99	1396.48	1396	22022000	HexNAc2Hex2NeuAcAc2
AVAVTLQSH	180417_27	1	1	1	0	0	13104	42.02	1161.5	2	2321.99	1396.48	1396	22022000	HexNAc2Hex2NeuAcAc2
AVAVTLQSH	180420_03	1	1	1	0	0	11960	39.88	1161.5	2	2321.99	1396.48	1396	22022000	HexNAc2Hex2NeuAcAc2
AVAVTLQSH	180417_27	1	1	1	0	0	12685	40.9	1161.5	2	2321.99	1396.48	1396	22022000	HexNAc2Hex2NeuAcAc2
AVAVTLQSH	180417_27	1	1	1	0	0	13267	42.47	1161.5	2	2321.99	1396.48	1396	22022000	HexNAc2Hex2NeuAcAc2
AVAVTLQSH	180420_20	1	1	1	0	0	9601	34.25	1161.5	2	2321.99	1396.48	1396	22022000	HexNAc2Hex2NeuAcAc2
AVAVTLQSH	180417_27	1	1	1	0	0	10977	36.62	1161.5	2	2321.99	1396.48	1396	22022000	HexNAc2Hex2NeuAcAc2
AVAVTLQSH	180420_03	1	1	1	0	0	11787	39.35	1161.5	2	2321.99	1396.48	1396	22022000	HexNAc2Hex2NeuAcAc2
AVAVTLQSH	180417_26	1	1	1	0	0	15919	40.15	774.67	3	2322	1396.49	1396	22022000	HexNAc2Hex2NeuAcAc2
AVAVTLQSH	180417_14	1	1	1	0	0	10949	36.27	1161.5	2	2322	1396.49	1396	22022000	HexNAc2Hex2NeuAcAc2
AVAVTLQSH	180422_02	1	1	1	0	0	10611	34.33	1161.5	2	2322	1396.49	1396	22022000	HexNAc2Hex2NeuAcAc2
AVAVTLQSH	180420_05	1	1	1	0	0	11695	38.85	1161.5	2	2322	1396.49	1396	22022000	HexNAc2Hex2NeuAcAc2
AVAVTLQSH	180417_27	1	1	1	0	0	13291	42.53	1161.5	2	2322	1396.49	1396	22022000	HexNAc2Hex2NeuAcAc2
AVAVTLQSH	180420_03	1	1	1	0	0	11508	38.55	1161.5	2	2322	1396.49	1396	22022000	HexNAc2Hex2NeuAcAc2
AVAVTLQSH	180420_29	1	1	1	0	0	12410	39.77	1161.5	2	2322	1396.49	1396	22022000	HexNAc2Hex2NeuAcAc2
AVAVTLQSH	180420_05	1	1	1	0	0	7672	28.33	1170.45	2	2339.9	1414.39	1414	22020110	HexNAc2Hex2NeuAc2SulphNa
AVAVTLQSH	180417_08	1	1	1	0	0	8763	30.77	1170.46	2	2339.9	1414.39	1414	22020110	HexNAc2Hex2NeuAc2SulphNa
AVAVTLQSH	180417_07	1	1	1	0	0	10252	30.43	780.64	3	2339.91	1414.4	1414	22020110	HexNAc2Hex2NeuAc2SulphNa
AVAVTLQSH	180417_15	1	1	1	0	0	11629	32.62	780.64	3	2339.91	1414.4	1414	22020110	HexNAc2Hex2NeuAc2SulphNa
AVAVTLQSH	180417_07	1	1	1	0	0	9962	29.87	780.642	3	2339.91	1414.4	1414	22020110	HexNAc2Hex2NeuAc2SulphNa
AVAVTLQSH	180417_28	1	1	1	0	0	9671	27.98	780.643	3	2339.91	1414.4	1414	22020110	HexNAc2Hex2NeuAc2SulphNa
AVAVTLQSH	180420_04	1	1	1	0	0	8019	27.45	780.643	3	2339.91	1414.4	1414	22020110	HexNAc2Hex2NeuAc2SulphNa
AVAVTLQSH	180420_19_i	1	1	1	0	0	13267	39.5	781.993	3	2343.97	1418.45	1418	22022010	HexNAc2Hex2NeuAcAc2Na
AVAVTLQSH	180420_02	1	1	1	0	0	13893	39.55	781.994	3	2343.97	1418.46	1418	22022010	HexNAc2Hex2NeuAcAc2Na
AVAVTLQSH	180417_05	1	1	1	0	0	15872	40.73	781.995	3	2343.97	1418.46	1418	22022010	HexNAc2Hex2NeuAcAc2Na
AVAVTLQSH	180417_28	1	1	1	0	0	15443	38.4	781.996	3	2343.97	1418.46	1418	22022010	HexNAc2Hex2NeuAcAc2Na
AVAVTLQSH	180417_26	1	1	1	0	0	16502	41.35	781.996	3	2343.97	1418.46	1418	22022010	HexNAc2Hex2NeuAcAc2Na
AVAVTLQSH	180417_27	1	1	1	0	0	9162	31.62	1192.51	2	2384.01	1458.5	1458	22120000	HexNAc2Hex2FucNeuAc2
AVAVTLQSH	180417_39	1	1	1	0	0	8468	27.88	1192.51	2	2384.01	1458.5	1458	22120000	HexNAc2Hex2FucNeuAc2
AVAVTLQSH	180420_03	1	1	1	0	0	8672	30.5	1192.51	2	2384.02	1458.51	1458	22120000	HexNAc2Hex2FucNeuAc2
AVAVTLQSH	180420_04	1	1	1	0	0	8673	29	795.344	3	2384.02	1458.51	1458	22120000	HexNAc2Hex2FucNeuAc2
AVAVTLQSH	180417_08	1	1	1	0	0	8694	30.6	1192.51	2	2384.02	1458.51	1458	22120000	HexNAc2Hex2FucNeuAc2
AVAVTLQSH	180417_31	1	1	1	0	0	9427	27.78	1192.51	2	2384.02	1458.51	1458	22120000	HexNAc2Hex2FucNeuAc2
AVAVTLQSH	180420_05	1	1	1	0	0	8208	29.78	1192.51	2	2384.02	1458.51	1458	22120000	HexNAc2Hex2FucNeuAc2
AVAVTLQSH	180420_12	1	1	1	0	0	8651	30.18	1192.51	2	2384.02	1458.51	1458	22120000	HexNAc2Hex2FucNeuAc2
AVAVTLQSH	180420_12	1	1	1	0	0	8889	30.82	1192.51	2	2384.02	1458.51	1458	22120000	HexNAc2Hex2FucNeuAc2
AVAVTLQSH	180420_03	1	1	1	0	0	8648	30.43	1192.51	2	2384.02	1458.51	1458	22120000	HexNAc2Hex2FucNeuAc2
AVAVTLQSH	180420_03	1	1	1	0	0	8667	30.48	1192.52	2	2384.02	1458.51	1458	22120000	HexNAc2Hex2FucNeuAc2
AVAVTLQSH	180417_05	1	1	1	0	0	10744	30.37	795.346	3	2384.02	1458.51	1458	22120000	HexNAc2Hex2FucNeuAc2
AVAVTLQSH	180417_38	1	1	1	0	0	8871	27.32	795.346	3	2384.02	1458.51	1458	22120000	HexNAc2Hex2FucNeuAc2
AVAVTLQSH	180417_07	1	1	1	0	0	9761	29.48	795.346	3	2384.02	1458.51	1458	22120000	HexNAc2Hex2FucNeuAc2
AVAVTLQSH	180420_13	1	1	1	0	0	9007	28.67	795.347	3	2384.03	1458.51	1458	22120000	HexNAc2Hex2FucNeuAc2
AVAVTLQSH	180420_20	1	1	1	0	0	8183	29.95	1192.52	2	2384.03	1458.52	1458	22120000	HexNAc2Hex2FucNeuAc2
AVAVTLQSH	180420_22	1	1	1	0	0	8025	28.88	1192.52	2	2384.03	1458.52	1458	22120000	HexNAc2Hex2FucNeuAc2
AVAVTLQSH	180422_01	1	1	1	0	0	9828	30.87	795.347	3	2384.03	1458.52	1458	22120000	HexNAc2Hex2FucNeuAc2
AVAVTLQSH	180417_16	1	1	1	0	0	9460	31	1192.52	2	2384.03	1458.52	1458	22120000	HexNAc2Hex2FucNeuAc2
AVAVTLQSH	180420_04	1	1	1	0	0	8187	27.83	795.347	3	2384.03	1458.52	1458	22120000	HexNAc2Hex2FucNeuAc2
AVAVTLQSH	180420_22	1	1	1	0	0	7850	28.37	1192.52	2	2384.03	1458.52	1458	22120000	HexNAc2Hex2FucNeuAc2
AVAVTLQSH	180417_07	1	1	1	0	0	10054	30.05	795.347	3	2384.03	1458.52	1458	22120000	HexNAc2Hex2FucNeuAc2
AVAVTLQSH	180417_15	1	1	1	0	0	11061	31.53	795.347	3	2384.03	1458.52	1458	22120000	HexNAc2Hex2FucNeuAc2
AVAVTLQSH	180422_04	1	1	1	0	0	8112	29.02	1192.52	2	2384.03	1458.52	1458	22120000	HexNAc2Hex2FucNeuAc2
AVAVTLQSH	180420_31	1	1	1	0	0	8403	28.75	1192.52	2	2384.03	1458.52	1458	22120000	HexNAc2Hex2FucNeuAc2
AVAVTLQSH	180422_03	1	1	1	0	0	8208	28.88	795.347	3	2384.03	1458.52	1458	22120000	HexNAc2Hex2FucNeuAc2
AVAVTLQSH	180417_37	1	1	1	0	0	9731	31.07	1192.52	2	2384.03	1458.52	1458	22120000	HexNAc2Hex2FucNeuAc2
AVAVTLQSH	180420_05	1	1	1	0	0	7820	28.75	1192.52	2	2384.03	1458.52	1458	22120000	HexNAc2Hex2FucNeuAc2
AVAVTLQSH	180417_08	1	1	1	0	0	8464	29.95	1192.52	2	2384.03	1458.52	1458	22120000	HexNAc2Hex2FucNeuAc2
AVAVTLQSH	180422_04	1	1	1	0	0	8345	29.55	1192.52	2	2384.03	1458.52	1458	22120000	HexNAc2Hex2FucNeuAc2
AVAVTLQSH	180420_21	1	1	1	0	0	8878	28.7	795.348	3	2384.03	1458.52	1458	22120000	HexNAc2Hex2FucNeuAc2
AVAVTLQSH	180420_04	1	1	1	0	0	8403	28.35	795.348	3	2384.03	1458.52	1458	22120000	HexNAc2Hex2FucNeuAc2
AVAVTLQSH	180420_03	1	1	1	0	0	8452	29.87	1192.52	2	2384.03	1458.52	1458	22120000	HexNAc2Hex2FucNeuAc2
AVAVTLQSH	180417_15	1	1	1	0	0	10756	30.98	795.348	3	2384.03	1458.52	1458	22120000	HexNAc2Hex2FucNeuAc2
AVAVTLQSH	180420_02	1	1	1	0	0	9652	29.78	795.348	3	2384.03	1458.52	1458	22120000	HexNAc2Hex2FucNeuAc2
AVAVTLQSH	180420_11	1	1	1	0	0	9724	29.77	795.348	3	2384.03	1458.52	1458	22120000	HexNAc2Hex2FucNeuAc2
AVAVTLQSH	180417_06	1	1	1	0	0	8788	31.08	1192.52	2	2384.03	1458.52	1458	22120000	HexNAc2Hex2FucNeuAc2
AVAVTLQSH	180420_19_i	1	1	1	0	0	9105	29.97	795.348	3	2384.03	1458.52	1458	22120000	HexNAc2Hex2FucNeuAc2
AVAVTLQSH	180417_07	1	1	1	0	0	10507	30.93	795.348	3	2384.03	1458.52	1458	22120000	HexNAc2Hex2FucNeuAc2
AVAVTLQSH	180417_13	1	1	1	0	0	11073	30.57	795.348	3	2384.03	1458.52	1458	22120000	HexNAc2Hex2FucNeuAc2
AVAVTLQSH	180417_23	1	1	1	0	0	8865	28.65	1192.52	2	2384.03	1458.52	1458	22120000	HexNAc2Hex2FucNeuAc2
AVAVTLQSH	180422_02	1	1	1	0	0	9125	30.67	1192.52	2	2384.03	1458.52	1458	22120000	HexNAc2Hex2FucNeuAc2
AVAVTLQSH	180417_08	1	1	1	0	0	8277	29.43	1192.52	2	2384.03	1458.52	1458	22120000	HexNAc2Hex2FucNeuAc2
AVAVTLQSH	180417_14	1	1	1	0	0	8954	30.85	1192.52	2	2384.03	1458.52	1458	22120000	HexNAc2Hex2FucNeuAc2
AVAVTLQSH	180420_14	1	1	1	0	0	8214	28.6	1192.52	2	2384.03	1458.52	1458	22120000	HexNAc2Hex2FucNeuAc2
AVAVTLQSH	180420_14	1	1	1	0	0	8448	29.13	1192.52	2	2384.03	1458.52	1458	22120000	HexNAc2Hex2FucNeuAc2
AVAVTLQSH	180420_05	1	1	1	0	0	8014	29.27	1192.52	2	2384.03	1458.52	1458	22120000	HexNAc2Hex2FucNeuAc2
AVAVTLQSH	180417_16	1	1	1	0	0	9229	30.45	1192.52	2	2384.04	1458.53	1458	22120000	HexNAc2Hex2FucNeuAc2
AVAVTLQSH	180420_05	1	1	1	0	0	7642	28.25	1192.52	2	2384.04	1458.53	1458	22120000	HexNAc2Hex2FucNeuAc2
AVAVTLQSH	180417_06	1	1	1	0	0	8626	30.57	1192.52	2	2384.04	1458.53	1458	22120000	HexNAc2Hex2FucNeuAc2
AVAVTLQSH	180417_07	1	1	1	0	0	9726	29.42	802.671	3	2406	1480.49	1480	22120010	HexNAc2Hex2FucNeuAc2Na
AVAVTLQSH	180422_03	1	1	1	0	0	8136	28.7	802.673	3	2406.01	1480.49	1480	22120010	HexNAc2Hex2FucNeuAc2Na
AVAVTLQSH	180422_03	1	1	1	0	0	8357	29.22	802.673	3	2406.01	1480.5	1480	22120010	HexNAc2Hex2FucNeuAc2Na
AVAVTLQSH	180417_28	1	1	1	0	0	9246	27.22	802.674	3	2406.01	1480.5	1480	22120010	HexNAc2Hex2FucNeuAc2Na
AVAVTLQSH	180417_15	1	1	1	0	0	11040	31.5	802.674	3	2406.01	1480.5	1480	22120010	HexNAc2Hex2FucNeuAc2Na
AVAVTLQSH	180417_15	1	1	1	0	0	10733	30.95	802.674	3	2406.01	1480.5	1480	22120010	HexNAc2Hex2FucNeuAc2Na
AVAVTLQSH	180420_04	1	1	1	0	0	8391	28.32	802.674	3	2406.01	1480.5	1480	22120010	HexNAc2Hex2FucNeuAc2Na
AVAVTLQSH	180417_28	1	1	1	0	0	9553	27.77	802.674	3	2406.01	1480.5	1480	22120010	HexNAc2Hex2FucNeuAc2Na
AVAVTLQSH	180417_07	1	1	1	0	2	10015	29.97	802.674	3	2406.01	1480.5	1480	22120010	HexNAc2Hex2FucNeuAc2Na
AVAVTLQSH	180420_05	1	1	1	0	2	7826	28.77	1203.51	2	2406.01	1480.5	1480	22120010	HexNAc2Hex2FucNeuAc2Na
AVAVTLQSH	180420_13	1	1	1	0	0	8986	28.63	802.674	3	2406.01	1480.5	1480	22120010	HexNAc2Hex2FucNeuAc2Na
AVAVTLQSH	180417_29	1	1	1	0	0	8840	29.75	1203.51	2	2406.01	1480.5	1480	22120010	HexNAc2Hex2FucNeuAc2Na
AVAVTLQSH	180420_21	1	1	1	0	0	9104	29.13	802.674	3	2406.01	1480.5	1480	22120010	HexNAc2Hex2FucNeuAc2Na
AVAVTLQSH	180420_21	1	1	1	0	0	8827	28.6	802.675	3	2406.01	1480.5	1480	22120010	HexNAc2Hex2FucNeuAc2Na
AVAVTLQSH	180417_16	1	1	1	0	0	9449	30.98	1203.51	2	2406.01	1480.5	1480	22120010	HexNAc2Hex2FucNeuAc2Na
AVAVTLQSH	180417_38	1	1	1	0	0	8807	27.18	802.675	3	2406.01	1480.5	1480	22120010	HexNAc2Hex2FucNeuAc2Na
AVAVTLQSH	180420_04	1	1	1	0	0	8176	27.8	802.675	3	2406.01	1480.5	1480	22120010	HexNAc2Hex2FucNeuAc2Na
AVAVTLQSH	180420_12	1	1	1	0	0	9145	31.52	1213.51	2	2426.02	1500.51	1500	22121000	HexNAc2Hex2FucNeuAcNeuAcAc
AVAVTLQSH	180420_20	1	1	1	0	0	10713	37.32	1213.52	2	2426.02	1500.51	1500	22121000	HexNAc2Hex2FucNeuAcNeuAcAc
AVAVTLQSH	180417_05	1	1	1	0	0	11971	33.02	809.347	3	2426.03	1500.52	1500	22121000	HexNAc2Hex2FucNeuAcNeuAcAc
AVAVTLQSH	180417_14	1	1	1	0	0	9461	32.28	1213.52	2	2426.03	1500.52	1500	22121000	HexNAc2Hex2FucNeuAcNeuAcAc
AVAVTLQSH	180417_08	1	1	1	0	0	8931	31.22	1213.52	2	2426.03	1500.52	1500	22121000	HexNAc2Hex2FucNeuAcNeuAcAc
AVAVTLQSH	180417_05	1	1	1	0	0	11340	31.68	809.349	3	2426.03	1500.52	1500	22121000	HexNAc2Hex2FucNeuAcNeuAcAc
AVAVTLQSH	180420_03	1	1	1	0	0	9281	32.22	1213.52	2	2426.03	1500.52	1500	22121000	HexNAc2Hex2FucNeuAcNeuAcAc
AVAVTLQSH	180417_06	1	1	1	0	0	11562	38.8	1213.52	2	2426.03	1500.52	1500	22121000	HexNAc2Hex2FucNeuAcNeuAcAc
AVAVTLQSH	180417_27	1	1	1	0	0	9701	33.13	1213.52	2	2426.03	1500.52	1500	22121000	HexNAc2Hex2FucNeuAcNeuAcAc
AVAVTLQSH	180420_19_i	1	1	1	0	0	12438	37.6	809.35	3	2426.03	1500.52	1500	22121000	HexNAc2Hex2FucNeuAcNeuAcAc
AVAVTLQSH	180422_04	1	1	1	0	0	11811	37.35	1213.52	2	2426.03	1500.52	1500	22121000	HexNAc2Hex2FucNeuAcNeuAcAc
AVAVTLQSH	180417_26	1	1	1	0	0	11945	32.47	809.35	3	2426.04	1500.52	1500	22121000	HexNAc2Hex2FucNeuAcNeuAcAc
AVAVTLQSH	180420_12	1	1	1	0	0	11506	37.68	1213.52	2	2426.04	1500.53	1500	22121000	HexNAc2Hex2FucNeuAcNeuAcAc
AVAVTLQSH	180422_02	1	1	1	0	0	11985	37.9	1213.52	2	2426.04	1500.53	1500	22121000	HexNAc2Hex2FucNeuAcNeuAcAc
AVAVTLQSH	180417_26	1	1	1	0	0	15518	39.38	809.351	3	2426.04	1500.53	1500	22121000	HexNAc2Hex2FucNeuAcNeuAcAc
AVAVTLQSH	180420_19_i	1	1	1	0	0	9636	31.23	809.351	3	2426.04	1500.53	1500	22121000	HexNAc2Hex2FucNeuAcNeuAcAc
AVAVTLQSH	180422_01	1	1	1	0	0	13087	38.08	809.351	3	2426.04	1500.53	1500	22121000	HexNAc2Hex2FucNeuAcNeuAcAc
AVAVTLQSH	180420_03	1	1	1	0	0	8885	31.08	1213.52	2	2426.04	1500.53	1500	22121000	HexNAc2Hex2FucNeuAcNeuAcAc
AVAVTLQSH	180417_06	1	1	1	0	0	9097	31.98	1213.52	2	2426.04	1500.53	1500	22121000	HexNAc2Hex2FucNeuAcNeuAcAc
AVAVTLQSH	180417_16	1	1	1	0	0	9921	32.13	1213.52	2	2426.04	1500.53	1500	22121000	HexNAc2Hex2FucNeuAcNeuAcAc
AVAVTLQSH	180417_15	1	1	1	0	0	11531	32.43	809.352	3	2426.04	1500.53	1500	22121000	HexNAc2Hex2FucNeuAcNeuAcAc
AVAVTLQSH	180417_06	1	1	1	0	0	11750	39.32	1213.52	2	2426.04	1500.53	1500	22121000	HexNAc2Hex2FucNeuAcNeuAcAc
AVAVTLQSH	180420_03	1	1	1	0	0	11123	37.45	1213.52	2	2426.04	1500.53	1500	22121000	HexNAc2Hex2FucNeuAcNeuAcAc
AVAVTLQSH	180417_06	1	1	1	0	0	9288	32.52	1213.52	2	2426.04	1500.53	1500	22121000	HexNAc2Hex2FucNeuAcNeuAcAc
AVAVTLQSH	180420_03	1	1	1	0	0	9052	31.57	1213.52	2	2426.04	1500.53	1500	22121000	HexNAc2Hex2FucNeuAcNeuAcAc
AVAVTLQSH	180417_06	1	1	1	0	0	11809	39.48	1213.53	2	2426.04	1500.53	1500	22121000	HexNAc2Hex2FucNeuAcNeuAcAc
AVAVTLQSH	180420_03	1	1	1	0	0	11319	38	1213.53	2	2426.04	1500.53	1500	22121000	HexNAc2Hex2FucNeuAcNeuAcAc
AVAVTLQSH	180417_14	1	1	1	0	0	12061	39.12	1213.53	2	2426.04	1500.53	1500	22121000	HexNAc2Hex2FucNeuAcNeuAcAc
AVAVTLQSH	180417_06	1	1	1	0	0	8807	31.13	1213.53	2	2426.04	1500.53	1500	22121000	HexNAc2Hex2FucNeuAcNeuAcAc
AVAVTLQSH	180422_02	1	1	1	0	0	9574	31.77	1213.53	2	2426.05	1500.54	1500	22121000	HexNAc2Hex2FucNeuAcNeuAcAc
AVAVTLQSH	180420_12	1	1	1	0	0	9091	31.37	1213.53	2	2426.05	1500.54	1500	22121000	HexNAc2Hex2FucNeuAcNeuAcAc
AVAVTLQSH	180420_20	1	1	1	0	0	8572	31.22	1213.53	2	2426.05	1500.54	1500	22121000	HexNAc2Hex2FucNeuAcNeuAcAc
AVAVTLQSH	180417_27	1	1	1	0	0	12342	40.07	1213.53	2	2426.05	1500.54	1500	22121000	HexNAc2Hex2FucNeuAcNeuAcAc
AVAVTLQSH	180417_07	1	1	1	0	0	10626	31.17	816.676	3	2448.01	1522.5	1522	22121010	HexNAc2Hex2FucNeuAcNeuAcAcNa
AVAVTLQSH	180417_05	1	1	1	0	0	14903	38.82	816.676	3	2448.01	1522.5	1522	22121010	HexNAc2Hex2FucNeuAcNeuAcAcNa
AVAVTLQSH	180417_07	1	1	1	0	0	14428	38.3	816.677	3	2448.02	1522.51	1522	22121010	HexNAc2Hex2FucNeuAcNeuAcAcNa
AVAVTLQSH	180417_28	1	1	1	0	0	10177	28.88	816.678	3	2448.02	1522.51	1522	22121010	HexNAc2Hex2FucNeuAcNeuAcAcNa
AVAVTLQSH	180417_28	1	1	1	0	0	14381	36.43	816.678	3	2448.02	1522.51	1522	22121010	HexNAc2Hex2FucNeuAcNeuAcAcNa
AVAVTLQSH	180417_15	1	1	1	0	0	11509	32.38	816.679	3	2448.02	1522.51	1522	22121010	HexNAc2Hex2FucNeuAcNeuAcAcNa
AVAVTLQSH	180417_27	1	1	1	0	0	12691	40.93	1234.52	2	2468.03	1542.52	1542	22122000	HexNAc2Hex2FucNeuAcAc2
AVAVTLQSH	180422_02	1	1	1	0	0	12205	38.48	1234.52	2	2468.03	1542.52	1542	22122000	HexNAc2Hex2FucNeuAcAc2
AVAVTLQSH	180420_19_i	1	1	1	0	0	12529	37.82	823.351	3	2468.04	1542.53	1542	22122000	HexNAc2Hex2FucNeuAcAc2
AVAVTLQSH	180417_27	1	1	1	0	0	12427	40.27	1234.52	2	2468.04	1542.53	1542	22122000	HexNAc2Hex2FucNeuAcAc2
AVAVTLQSH	180417_37	1	1	1	0	0	13311	39.53	1234.52	2	2468.04	1542.53	1542	22122000	HexNAc2Hex2FucNeuAcAc2
AVAVTLQSH	180417_14	1	1	1	0	0	10578	35.28	1234.52	2	2468.04	1542.53	1542	22122000	HexNAc2Hex2FucNeuAcAc2
AVAVTLQSH	180420_20	1	1	1	0	0	11023	38.2	1234.53	2	2468.04	1542.53	1542	22122000	HexNAc2Hex2FucNeuAcAc2
AVAVTLQSH	180420_19_i	1	1	1	0	0	10722	33.67	823.353	3	2468.04	1542.53	1542	22122000	HexNAc2Hex2FucNeuAcAc2
AVAVTLQSH	180420_19_i	1	1	1	0	0	12757	38.37	823.353	3	2468.04	1542.53	1542	22122000	HexNAc2Hex2FucNeuAcAc2
AVAVTLQSH	180417_13	1	1	1	0	0	15719	39.75	823.353	3	2468.05	1542.54	1542	22122000	HexNAc2Hex2FucNeuAcAc2
AVAVTLQSH	180417_05	1	1	1	0	0	12481	34.02	823.354	3	2468.05	1542.54	1542	22122000	HexNAc2Hex2FucNeuAcAc2
AVAVTLQSH	180417_05	1	1	1	0	0	14817	38.63	823.354	3	2468.05	1542.54	1542	22122000	HexNAc2Hex2FucNeuAcAc2
AVAVTLQSH	180417_26	1	1	1	0	0	15977	40.27	823.354	3	2468.05	1542.54	1542	22122000	HexNAc2Hex2FucNeuAcAc2
AVAVTLQSH	180417_05	1	1	1	0	0	15228	39.45	823.354	3	2468.05	1542.54	1542	22122000	HexNAc2Hex2FucNeuAcAc2
AVAVTLQSH	180420_29	1	1	1	0	0	11847	38.32	1234.53	2	2468.05	1542.54	1542	22122000	HexNAc2Hex2FucNeuAcAc2
AVAVTLQSH	180420_19_i	1	1	1	0	0	12996	38.92	823.354	3	2468.05	1542.54	1542	22122000	HexNAc2Hex2FucNeuAcAc2
AVAVTLQSH	180420_02	1	1	1	0	0	13363	38.32	823.354	3	2468.05	1542.54	1542	22122000	HexNAc2Hex2FucNeuAcAc2
AVAVTLQSH	180417_05	1	1	1	0	0	15486	39.98	823.354	3	2468.05	1542.54	1542	22122000	HexNAc2Hex2FucNeuAcAc2
AVAVTLQSH	180420_11	1	1	1	0	0	13501	38.13	823.354	3	2468.05	1542.54	1542	22122000	HexNAc2Hex2FucNeuAcAc2
AVAVTLQSH	180417_36	1	1	1	0	0	14462	39.37	823.355	3	2468.05	1542.54	1542	22122000	HexNAc2Hex2FucNeuAcAc2
AVAVTLQSH	180417_14	1	1	1	0	0	12564	40.35	1234.53	2	2468.05	1542.54	1542	22122000	HexNAc2Hex2FucNeuAcAc2
AVAVTLQSH	180417_06	1	1	1	0	0	11926	39.8	1234.53	2	2468.05	1542.54	1542	22122000	HexNAc2Hex2FucNeuAcAc2
AVAVTLQSH	180420_12	1	1	1	0	0	11808	38.48	1234.53	2	2468.05	1542.54	1542	22122000	HexNAc2Hex2FucNeuAcAc2
AVAVTLQSH	180417_14	1	1	1	0	0	12360	39.83	1234.53	2	2468.05	1542.54	1542	22122000	HexNAc2Hex2FucNeuAcAc2
AVAVTLQSH	180420_03	1	1	1	0	0	11449	38.38	1234.53	2	2468.05	1542.54	1542	22122000	HexNAc2Hex2FucNeuAcAc2
AVAVTLQSH	180417_06	1	1	1	0	0	11534	38.73	1234.53	2	2468.05	1542.54	1542	22122000	HexNAc2Hex2FucNeuAcAc2
AVAVTLQSH	180420_12	1	1	1	0	0	9969	33.62	1234.53	2	2468.05	1542.54	1542	22122000	HexNAc2Hex2FucNeuAcAc2
AVAVTLQSH	180417_16	1	1	1	0	0	13248	39.77	1234.53	2	2468.05	1542.54	1542	22122000	HexNAc2Hex2FucNeuAcAc2
AVAVTLQSH	180417_06	1	1	1	0	0	9958	34.38	1234.53	2	2468.06	1542.55	1542	22122000	HexNAc2Hex2FucNeuAcAc2
AVAVTLQSH	180420_20	1	1	1	0	0	10806	37.58	1234.53	2	2468.06	1542.55	1542	22122000	HexNAc2Hex2FucNeuAcAc2
AVAVTLQSH	180422_02	1	1	1	0	0	12213	38.5	1234.53	2	2468.06	1542.55	1542	22122000	HexNAc2Hex2FucNeuAcAc2
AVAVTLQSH	180417_27	1	1	1	0	0	12684	40.9	1234.53	2	2468.06	1542.55	1542	22122000	HexNAc2Hex2FucNeuAcAc2
AVAVTLQSH	180417_06	1	1	1	0	0	12112	40.32	1234.53	2	2468.06	1542.55	1542	22122000	HexNAc2Hex2FucNeuAcAc2
AVAVTLQSH	180420_05	1	1	1	0	0	8453	30.48	1286.04	2	2571.07	1645.56	1645	22031000	HexNAc2Hex2NeuAc2NeuAcAc
AVAVTLQSH	180417_23	1	1	1	0	0	10521	32.6	1286.04	2	2571.07	1645.56	1645	22031000	HexNAc2Hex2NeuAc2NeuAcAc
AVAVTLQSH	180417_15	1	1	1	0	0	13073	35.27	857.695	3	2571.07	1645.56	1645	22031000	HexNAc2Hex2NeuAc2NeuAcAc
AVAVTLQSH	180417_07	1	1	1	0	0	11461	32.77	857.695	3	2571.07	1645.56	1645	22031000	HexNAc2Hex2NeuAc2NeuAcAc
AVAVTLQSH	180420_14	1	1	1	0	0	10059	32.85	1286.04	2	2571.08	1645.57	1645	22031000	HexNAc2Hex2NeuAc2NeuAcAc
AVAVTLQSH	180417_08	1	1	1	0	0	9761	33.32	1286.04	2	2571.08	1645.57	1645	22031000	HexNAc2Hex2NeuAc2NeuAcAc
AVAVTLQSH	180420_12	1	1	1	0	0	8696	30.28	1302.05	2	2603.1	1677.59	1677	33020000	HexNAc3Hex3NeuAc2
AVAVTLQSH	180417_26	1	1	1	0	0	11192	31.07	868.372	3	2603.1	1677.59	1677	33020000	HexNAc3Hex3NeuAc2
AVAVTLQSH	180417_06	1	1	1	0	0	8695	30.78	1302.06	2	2603.1	1677.59	1677	33020000	HexNAc3Hex3NeuAc2
AVAVTLQSH	180420_03	1	1	1	0	0	8503	30	1302.06	2	2603.11	1677.6	1677	33020000	HexNAc3Hex3NeuAc2
AVAVTLQSH	180420_03	1	1	1	0	0	8527	30.07	1302.06	2	2603.11	1677.6	1677	33020000	HexNAc3Hex3NeuAc2
AVAVTLQSH	180420_19_i	1	1	1	0	2	9130	30.03	868.374	3	2603.11	1677.6	1677	33020000	HexNAc3Hex3NeuAc2
AVAVTLQSH	180417_15	1	1	1	0	0	10809	31.08	868.375	3	2603.11	1677.6	1677	33020000	HexNAc3Hex3NeuAc2
AVAVTLQSH	180417_15	1	1	1	0	0	17029	42.7	871.699	3	2613.08	1687.57	1687	22032000	HexNAc2Hex2NeuAcNeuAcAc2
AVAVTLQSH	180420_05	1	1	1	0	0	11907	39.37	1307.05	2	2613.09	1687.58	1687	22032000	HexNAc2Hex2NeuAcNeuAcAc2
AVAVTLQSH	180417_07	1	1	1	0	0	16150	41.52	871.702	3	2613.09	1687.58	1687	22032000	HexNAc2Hex2NeuAcNeuAcAc2
AVAVTLQSH	180417_13	1	1	1	0	0	9700	27.9	887.719	3	2661.14	1735.63	1735	43110000	HexNAc4Hex3FucNeuAc
AVAVTLQSH	180417_07	1	1	1	0	0	9544	29.07	917.054	3	2749.15	1823.64	1823	33120000	HexNAc3Hex3FucNeuAc2
AVAVTLQSH	180420_05	1	1	1	0	0	7557	28.02	1375.08	2	2749.15	1823.64	1823	33120000	HexNAc3Hex3FucNeuAc2
AVAVTLQSH	180417_15	1	1	1	0	0	10423	30.37	917.059	3	2749.16	1823.65	1823	33120000	HexNAc3Hex3FucNeuAc2
AVAVTLQSH	180420_04	1	1	1	0	0	8152	27.75	917.06	3	2749.17	1823.66	1823	33120000	HexNAc3Hex3FucNeuAc2
AVAVTLQSH	180420_13	1	1	1	0	0	8709	28.12	924.385	3	2771.14	1845.63	1845	33120010	HexNAc3Hex3FucNeuAc2Na
AVAVTLQSH	180420_05	1	1	1	0	0	7544	27.98	1448.11	2	2895.21	1969.7	1969	33220000	HexNAc3Hex3Fuc2NeuAc2
AVAVTLQSH	180417_07	1	1	1	0	0	9478	28.95	965.742	3	2895.21	1969.7	1969	33220000	HexNAc3Hex3Fuc2NeuAc2
AVAVTLQSH	180417_06	1	1	1	0	0	8439	29.97	1448.11	2	2895.21	1969.7	1969	33220000	HexNAc3Hex3Fuc2NeuAc2
AVAVTLQSH	180420_13	1	1	1	0	0	8693	28.08	965.743	3	2895.22	1969.71	1969	33220000	HexNAc3Hex3Fuc2NeuAc2
AVAVTLQSH	180417_15	1	1	1	0	0	10330	30.18	965.747	3	2895.23	1969.72	1969	33220000	HexNAc3Hex3Fuc2NeuAc2
AVAVTLQSH	180420_04	1	1	1	0	0	8113	27.67	965.747	3	2895.23	1969.72	1969	33220000	HexNAc3Hex3Fuc2NeuAc2
AVAVTLQSH	180417_15	1	1	1	0	0	10280	30.07	973.07	3	2917.19	1991.68	1991	33220010	HexNAc3Hex3Fuc2NeuAc2Na
AVAVTLQSH	180422_03	1	1	1	0	0	7963	28.3	973.07	3	2917.2	1991.68	1991	33220010	HexNAc3Hex3Fuc2NeuAc2Na
AVAVTLQSH	180420_04	1	1	1	0	0	8070	27.57	973.071	3	2917.2	1991.69	1991	33220010	HexNAc3Hex3Fuc2NeuAc2Na
AVAVTLQSH	180420_21	1	1	1	0	0	8536	28.02	973.071	3	2917.2	1991.69	1991	33220010	HexNAc3Hex3Fuc2NeuAc2Na
AVAVTLQSH	180420_13	1	1	1	0	0	8642	27.98	973.071	3	2917.2	1991.69	1991	33220010	HexNAc3Hex3Fuc2NeuAc2Na
AVAVTLQSH	180417_07	1	1	1	0	0	9563	29.1	973.071	3	2917.2	1991.69	1991	33220010	HexNAc3Hex3Fuc2NeuAc2Na
AVAVTLQSH	180417_28	1	1	1	0	0	8897	26.55	973.072	3	2917.2	1991.69	1991	33220010	HexNAc3Hex3Fuc2NeuAc2Na
AVAVTLQSH	180417_26	1	1	1	0	0	10778	30.3	990.082	3	2968.23	2042.72	2042	44020000	HexNAc4Hex4NeuAc2
AVAVTLQSH	180422_02	1	1	1	0	0	8893	30.02	1484.62	2	2968.24	2042.73	2042	44020000	HexNAc4Hex4NeuAc2
AVAVTLQSH	180417_26	1	1	1	0	0	9700	28.28	1087.11	3	3259.33	2333.82	2333	44030000	HexNAc4Hex4NeuAc3
AVAVTLQSH	180417_05	1	1	1	0	0	9948	28.72	1087.11	3	3259.33	2333.82	2333	44030000	HexNAc4Hex4NeuAc3
AVAVTLQSH	180420_02	1	1	1	0	0	9154	28.7	1087.11	3	3259.33	2333.82	2333	44030000	HexNAc4Hex4NeuAc3
AVAVTLQSH	180420_19_i	1	1	1	0	0	8282	28.13	1087.11	3	3259.33	2333.82	2333	44030000	HexNAc4Hex4NeuAc3
AVAVTLQSH	180420_04	1	1	1	0	0	7021	25.22	1087.11	3	3259.33	2333.82	2333	44030000	HexNAc4Hex4NeuAc3
AVAVTLQSH	180417_13	1	1	1	0	0	9678	27.85	1087.12	3	3259.33	2333.82	2333	44030000	HexNAc4Hex4NeuAc3
AVAVTLQSH	180417_15	1	1	1	0	0	9586	28.83	1087.12	3	3259.35	2333.84	2333	44030000	HexNAc4Hex4NeuAc3
AVAVTLQSH	180417_13	1	1	1	0	0	10026	28.52	1106.47	3	3317.39	2391.88	2391	54120000	HexNAc5Hex4FucNeuAc2

## Sheet: Glycan Distribution (AVAVTLQSH)
The nominal masses of the glycans detected are listed in increasing order along the X axis, the scale is not linear.
The number of PSMs are indicate on the Y axis.
Labels of the same color indicate glycan families differing in the degree of O-acetylation.
The solid arrows indicate the 'normal' sialoglycans; the dotted arrows point to structures with one or two O-acetil sialic acids.
The asterisks label the Na-adducts.
